# Supplementary material for: Development of 18F-Labeled Bispyridyl Tetrazines for In Vivo Pretargeted PET Imaging
Source: MDPI journal article supplement (doi:10.3390/ph15020245), 2022-02-18

## Supporting Information

# Development of $^{18}\text{F}$ -Labeled Bispyridyl Tetrazines for In Vivo Pretargeted PET Imaging

Rocío García-Vázquez <sup>1,2,†</sup>, Jesper Tranekjær Jørgensen <sup>3,†</sup>, Klas Erik Bratteby <sup>1,2,4</sup>, Vladimir Shalgunov <sup>1,2</sup>, Lars Hvass <sup>3</sup>, Matthias M. Herth <sup>1,2,\*</sup>, Andreas Kjær <sup>3,\*</sup> and Umberto Maria Battisti <sup>1,\*</sup>

<sup>1</sup> Department of Drug Design and Pharmacology, Faculty of Health and Medical Sciences,  
University of Copenhagen, Universitetsparken 2, 2100 Copenhagen, Denmark;  
rociogv@sund.ku.dk (R.G.-V.); klas.bratteby@sund.ku.dk (K.B.);  
vladimir.shalgunov@sund.ku.dk (V.S)

<sup>2</sup> Department of Clinical Physiology, Nuclear Medicine & PET, Rigshospitalet,  
Blegdamsvej 9,  
2100 Copenhagen, Denmark

<sup>3</sup> Cluster for Molecular Imaging, Department of Biomedical Sciences, University of  
Copenhagen,  
Blegdamsvej 3, 2100 Copenhagen, Denmark; jespertj@sund.ku.dk (J.T.J.);  
lars.hvass@sund.ku.dk (L.H.)

<sup>4</sup> Department of Radiation Physics, Skåne University Hospital, Barngatan 3, 22242 Lund,  
Sweden

\* Correspondence: matthias.herth@sund.ku.dk (M.M.H.); akjaer@sund.ku.dk (A.K.);  
umberto.battisti@sund.ku.dk (U.M.B.)

† These authors contributed equally to the work.

2-Fluoroethyl 4-(1,2,4,5-tetrazin-3-yl)benzoate (3)

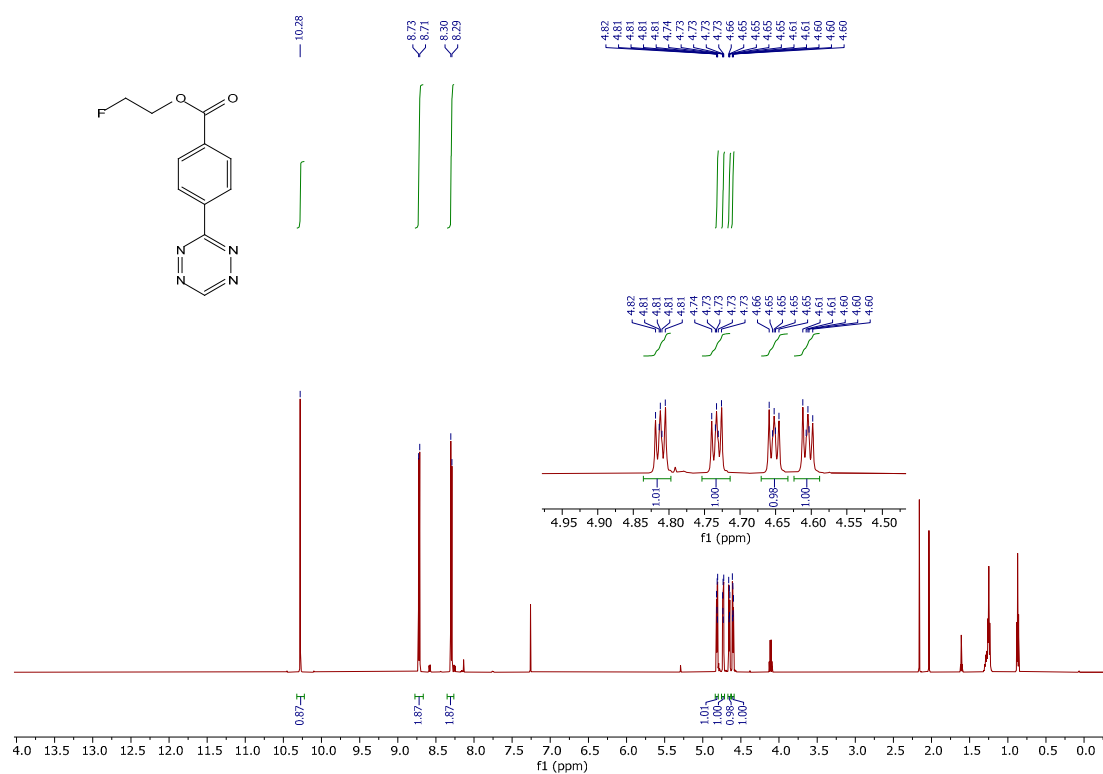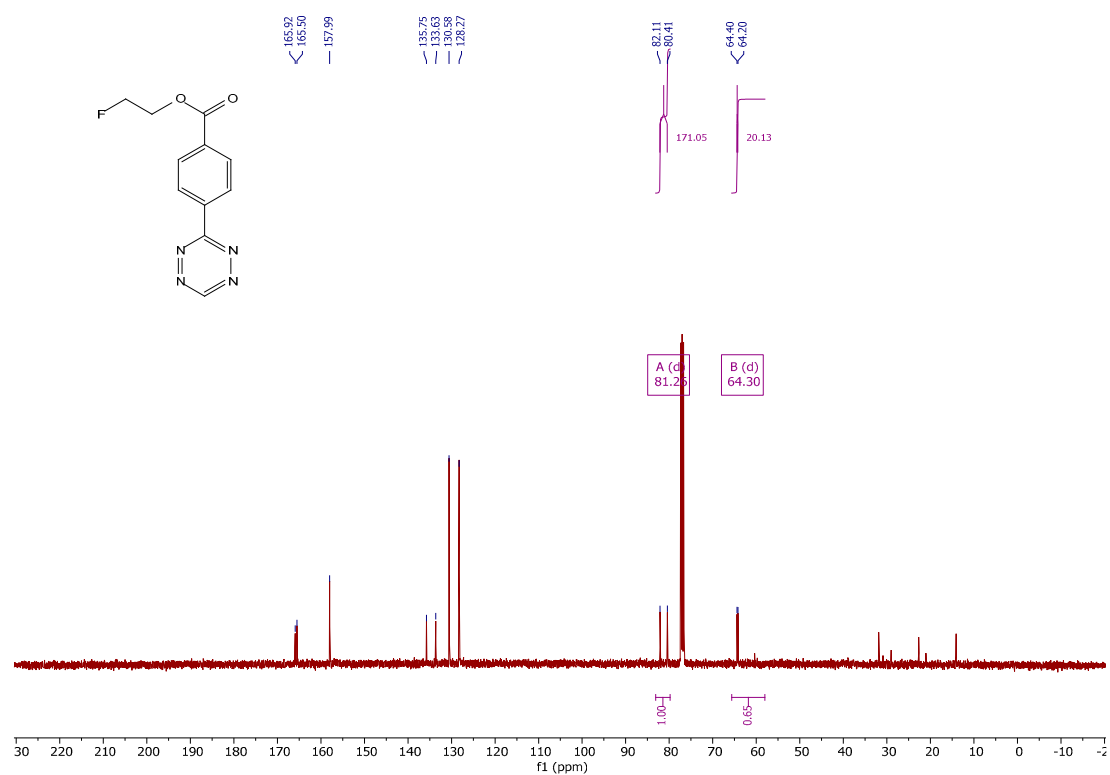

2-(((4-Nitrophenyl)sulfonyl)oxy)ethyl 4-(1,2,4,5-tetrazin-3-yl)benzoate (**3a**)

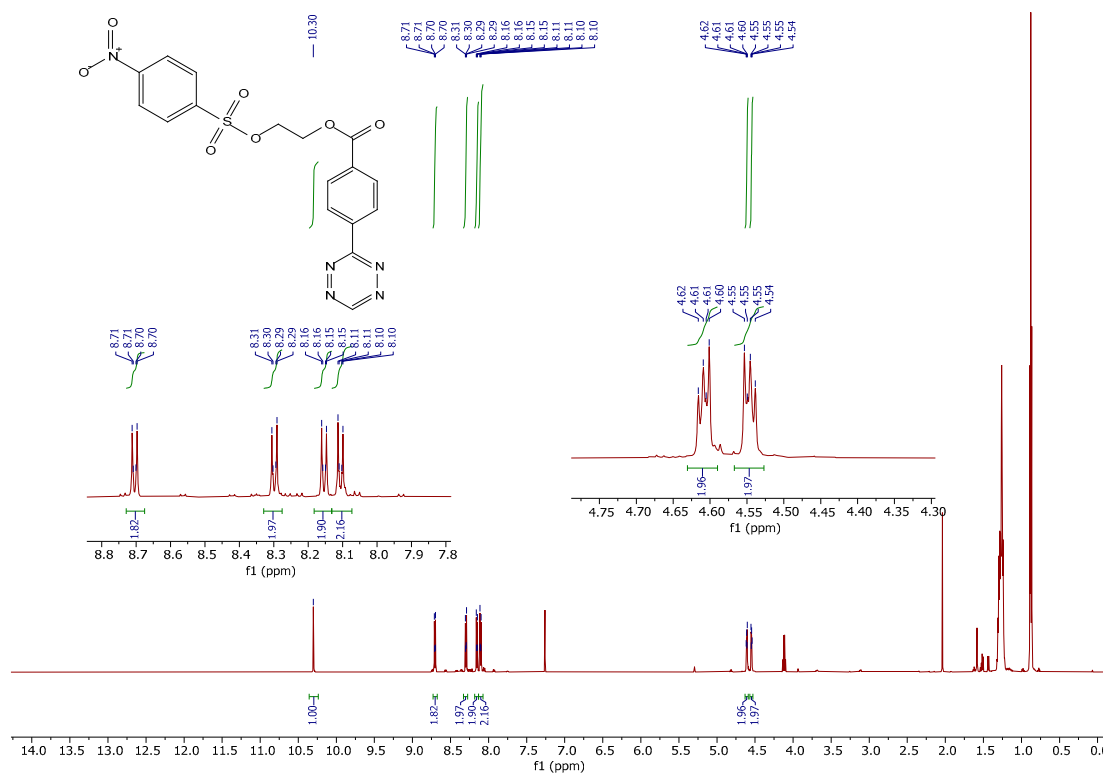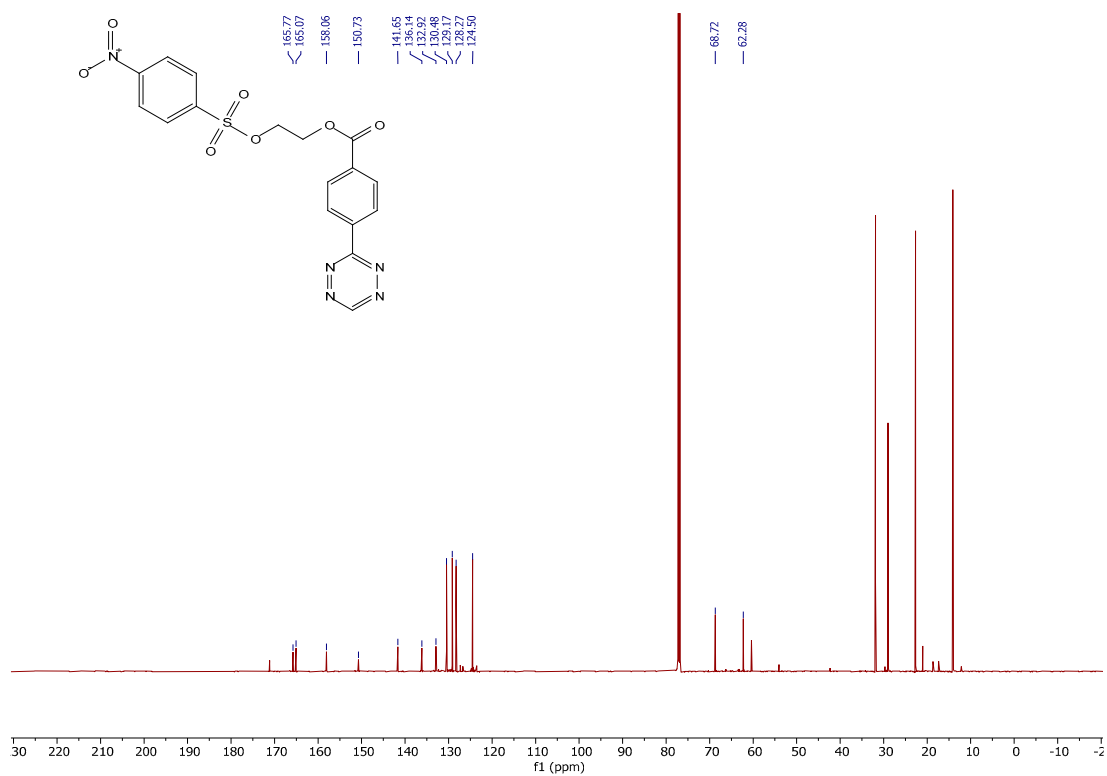

*N*-(2-fluoroethyl)-4-(1,2,4,5-tetrazin-3-yl)benzamide (4)

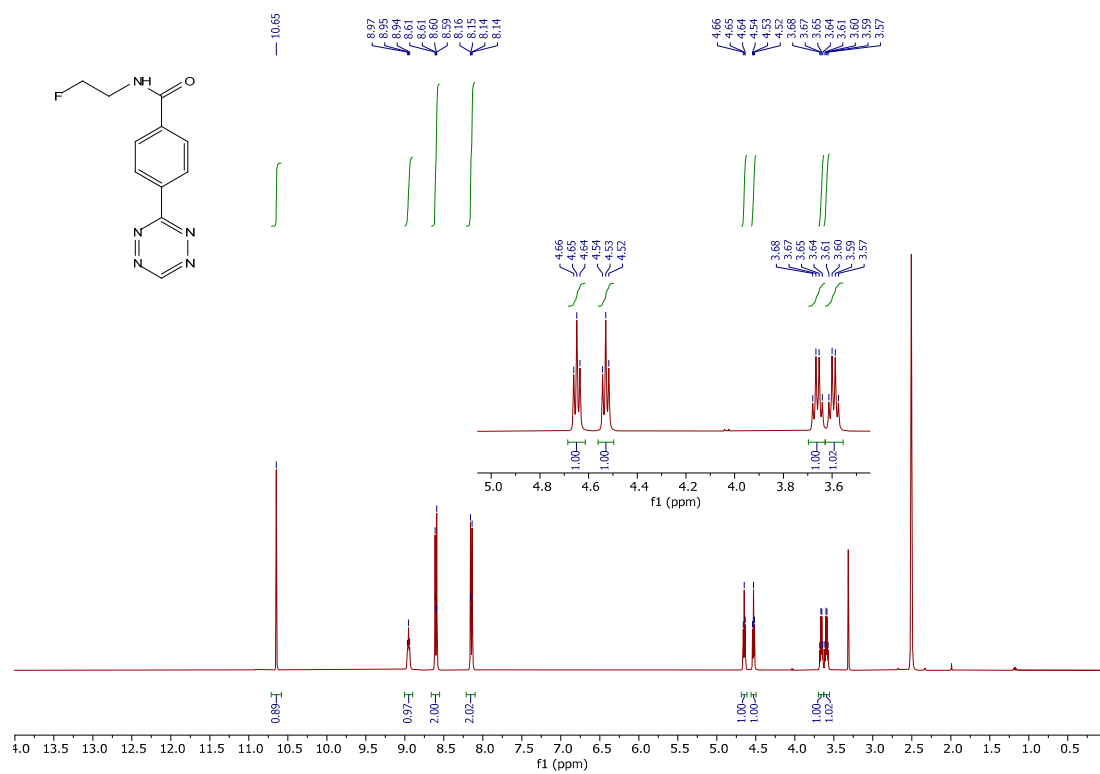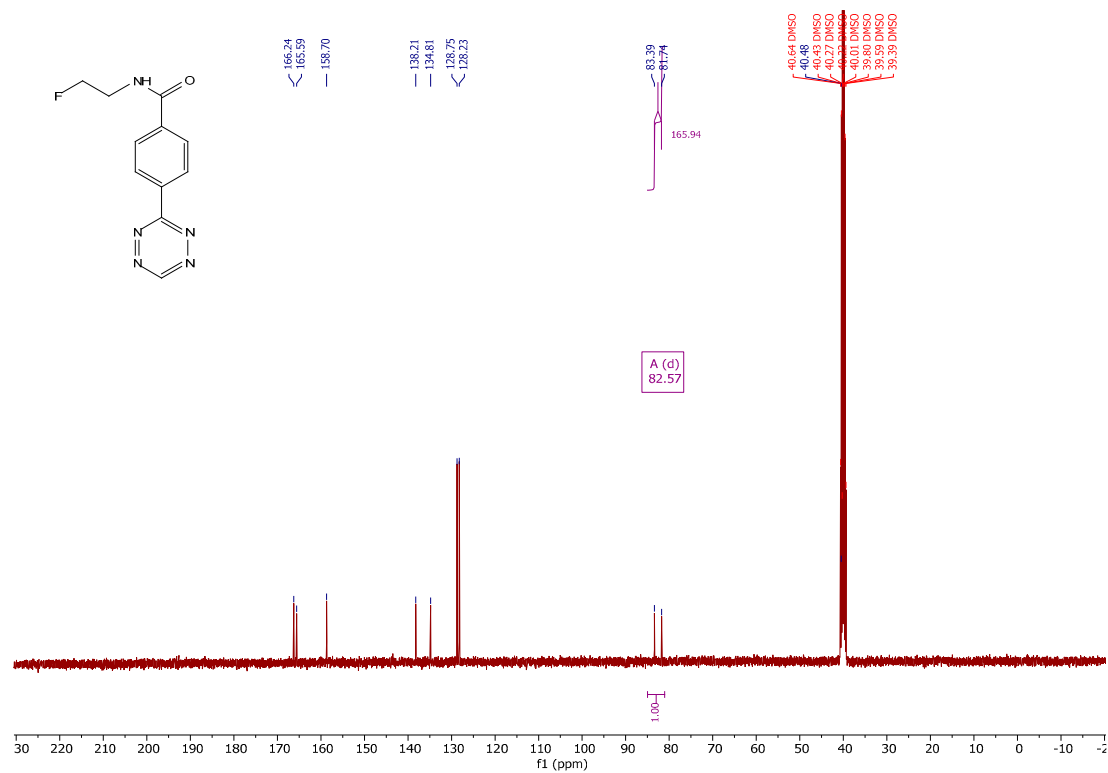

*2-Fluoroethyl 2-(4-(1,2,4,5-tetrazin-3-yl)phenyl)acetate (5)*

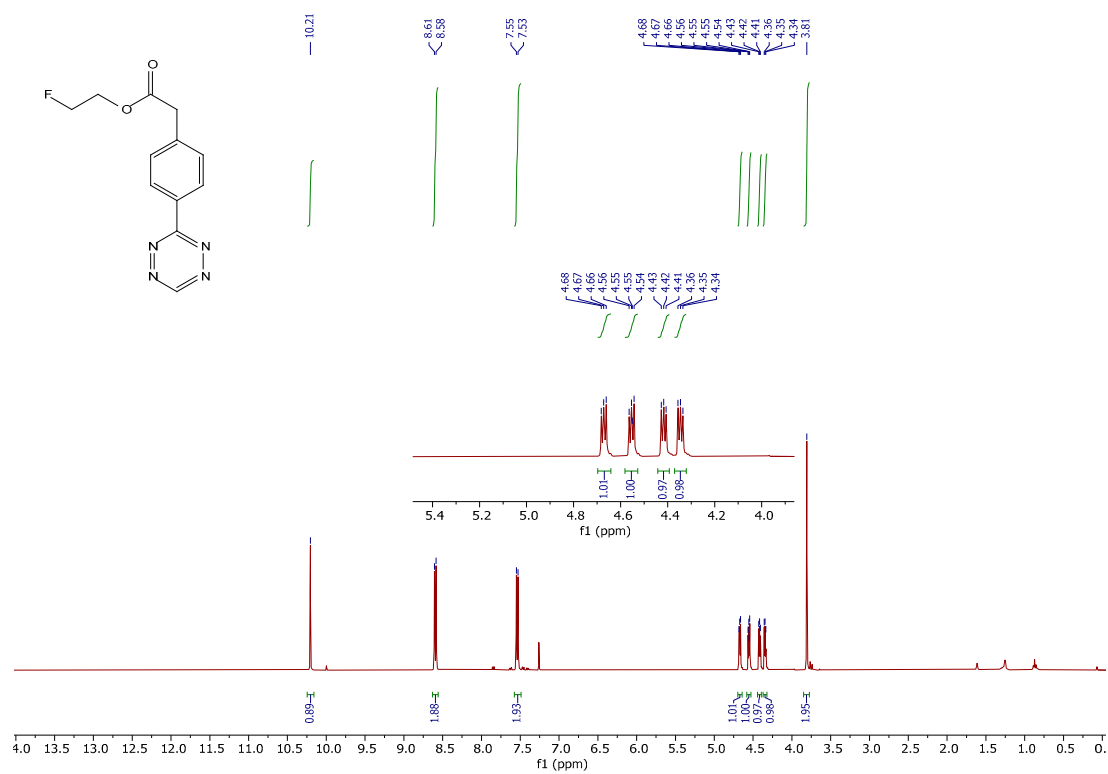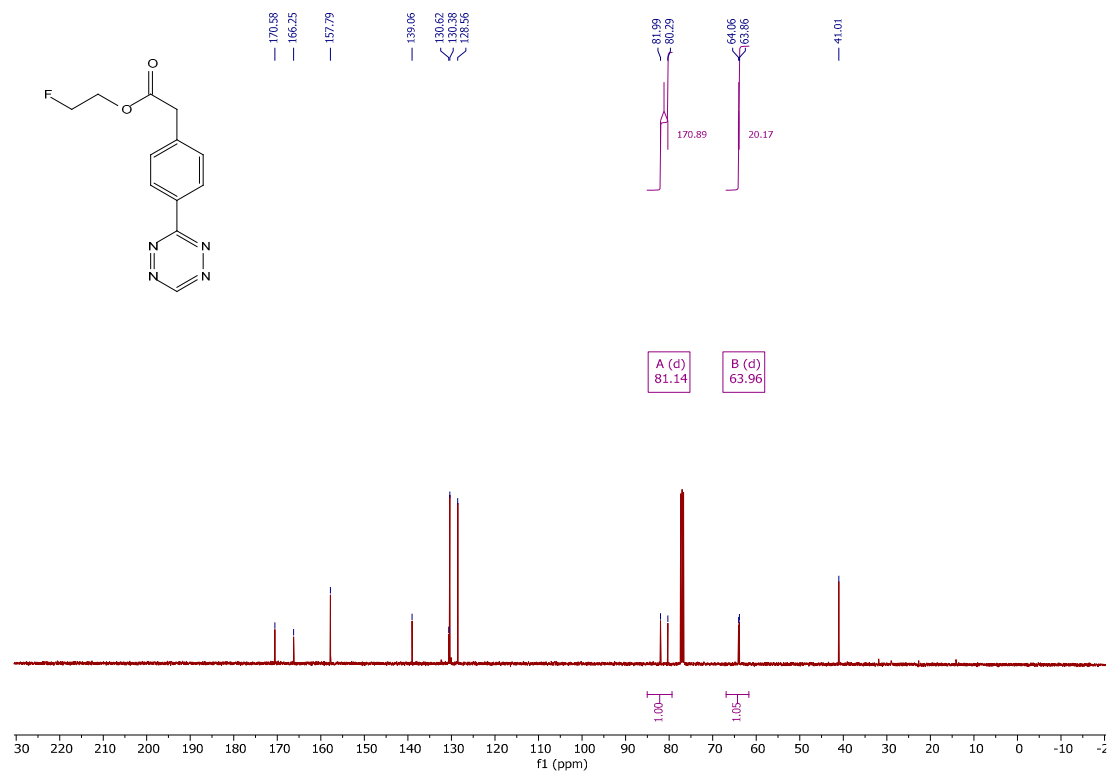

2-(((4-Nitrophenyl)sulfonyl)oxy)ethyl 2-(4-(1,2,4,5-tetrazin-3-yl)phenyl)acetate (**5a**)

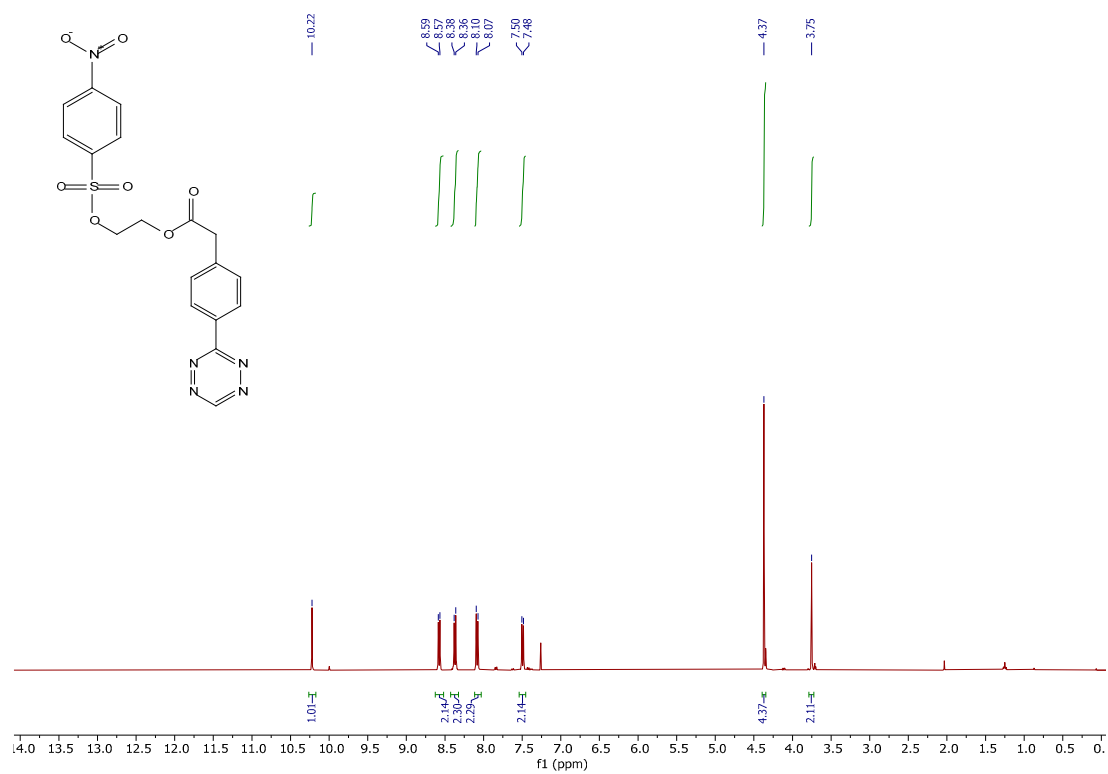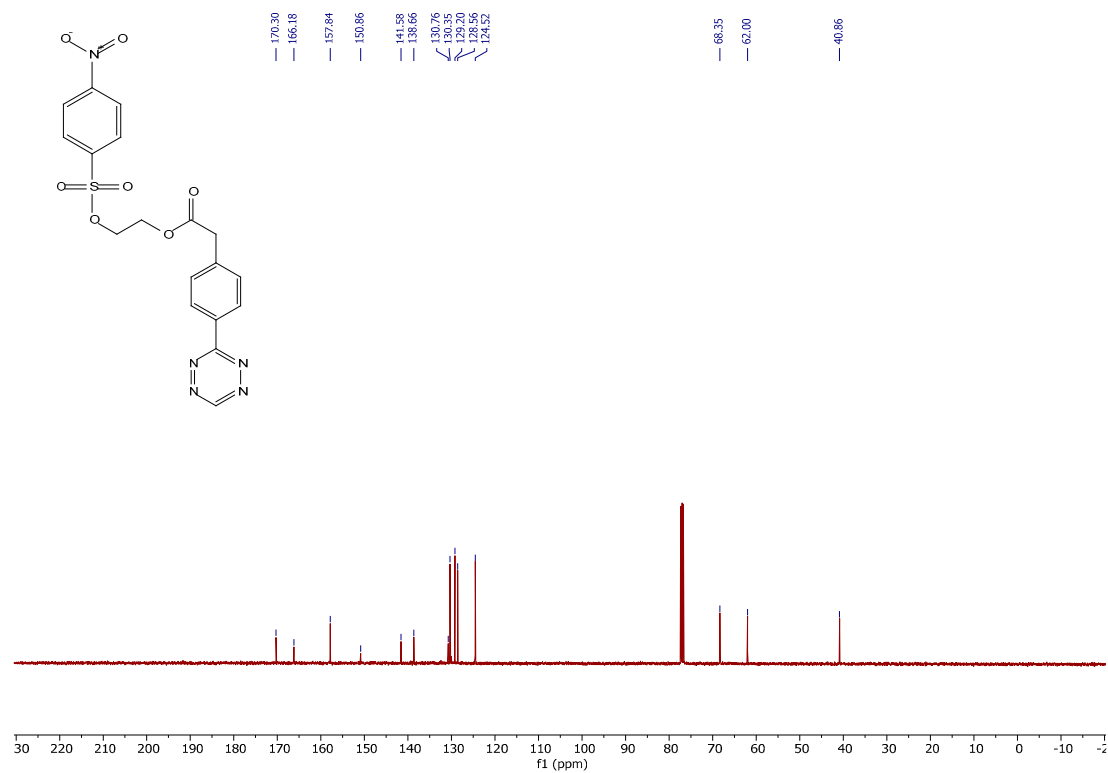

2-(4-(1,2,4,5-Tetrazin-3-yl)phenyl)-N-(2-fluoroethyl)acetamide (6)

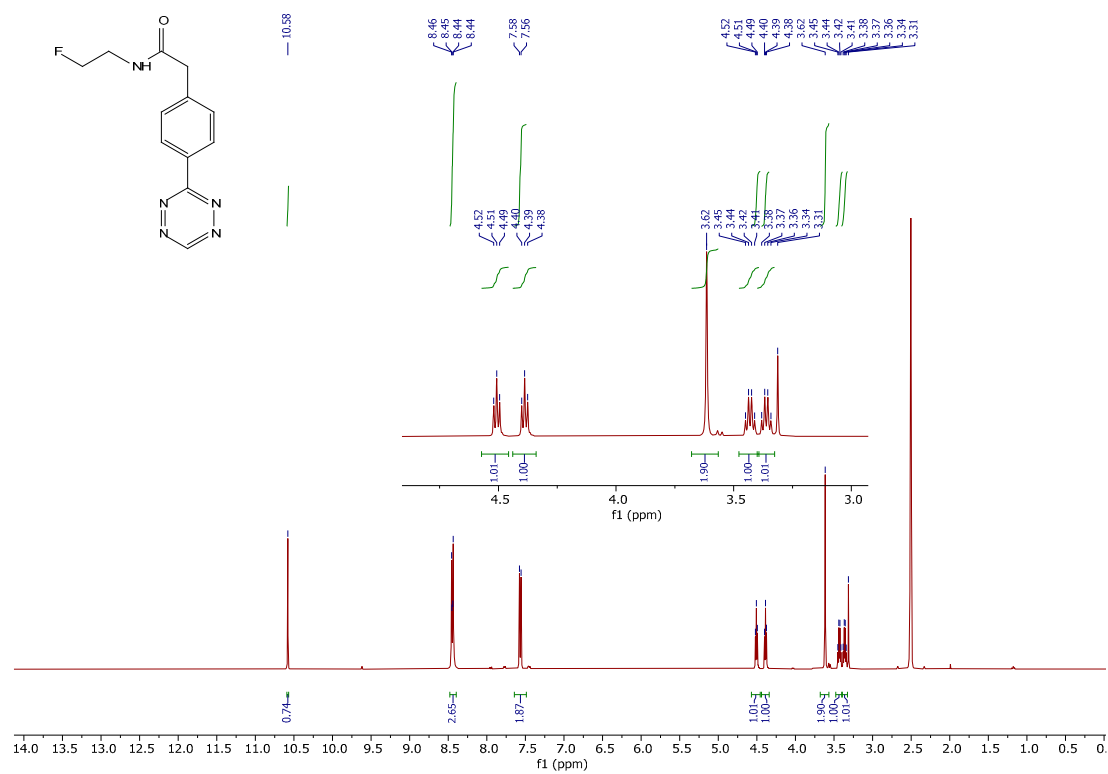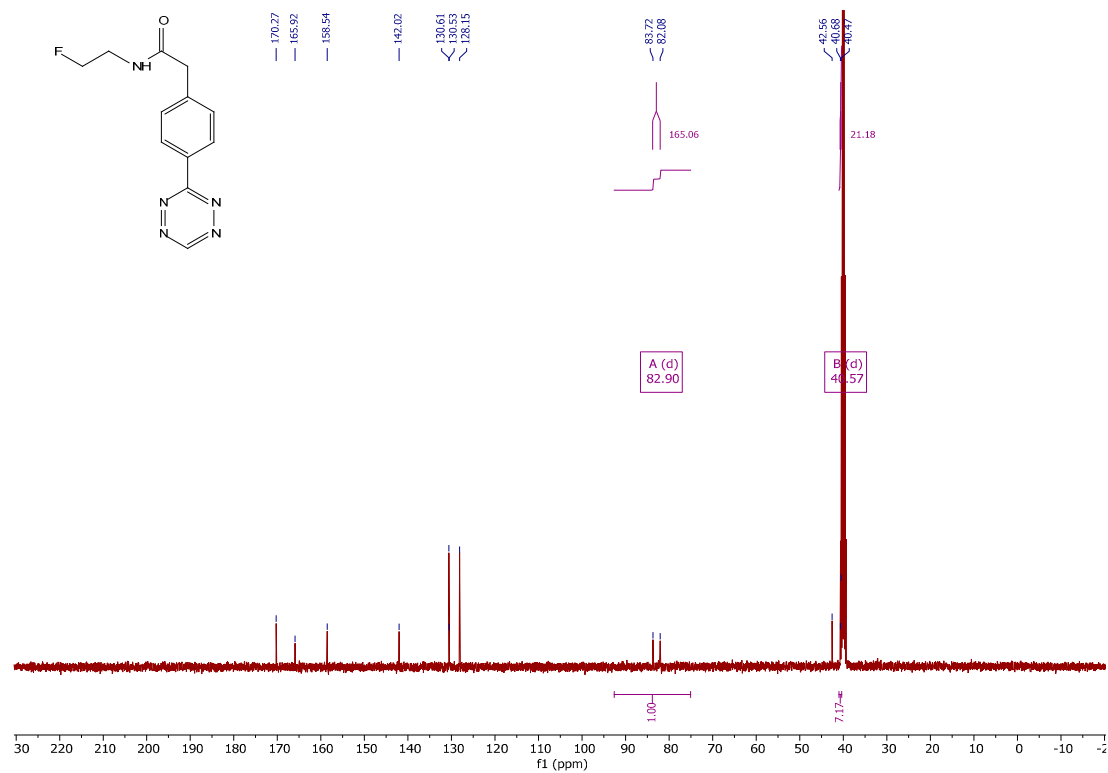

2-(2-(4-(1,2,4,5-Tetrazin-3-yl)phenyl)acetamido)ethyl 4-nitrobenzenesulfonate (**6a**)

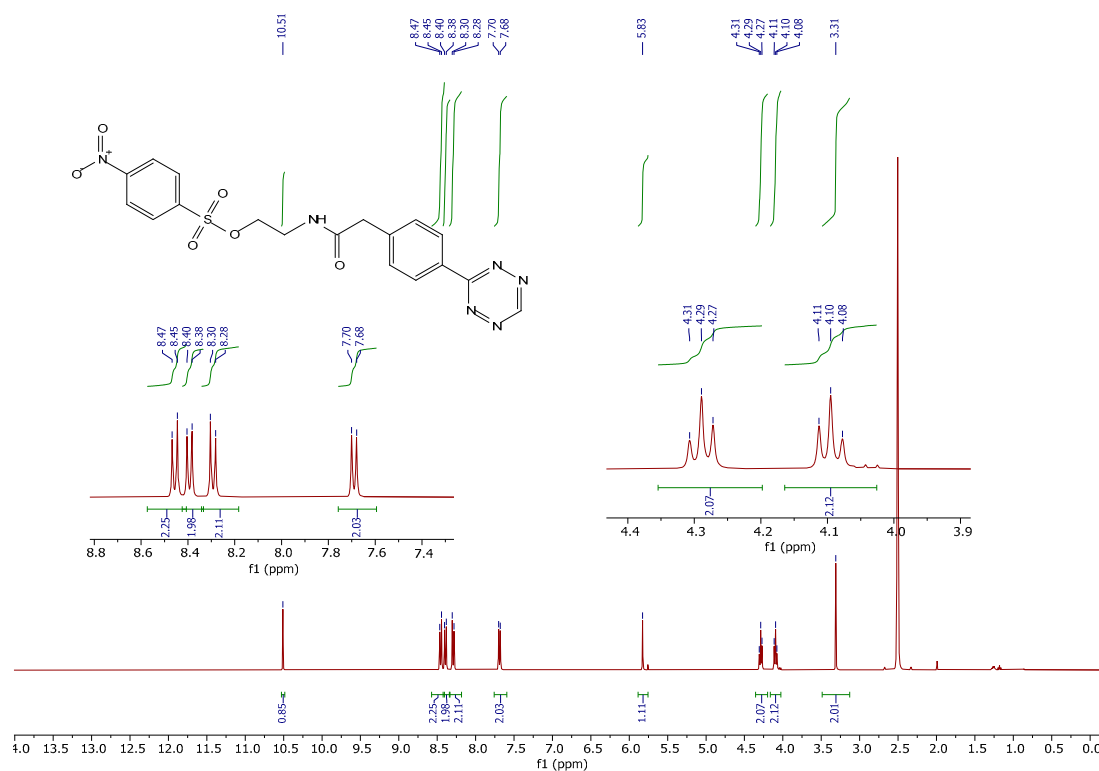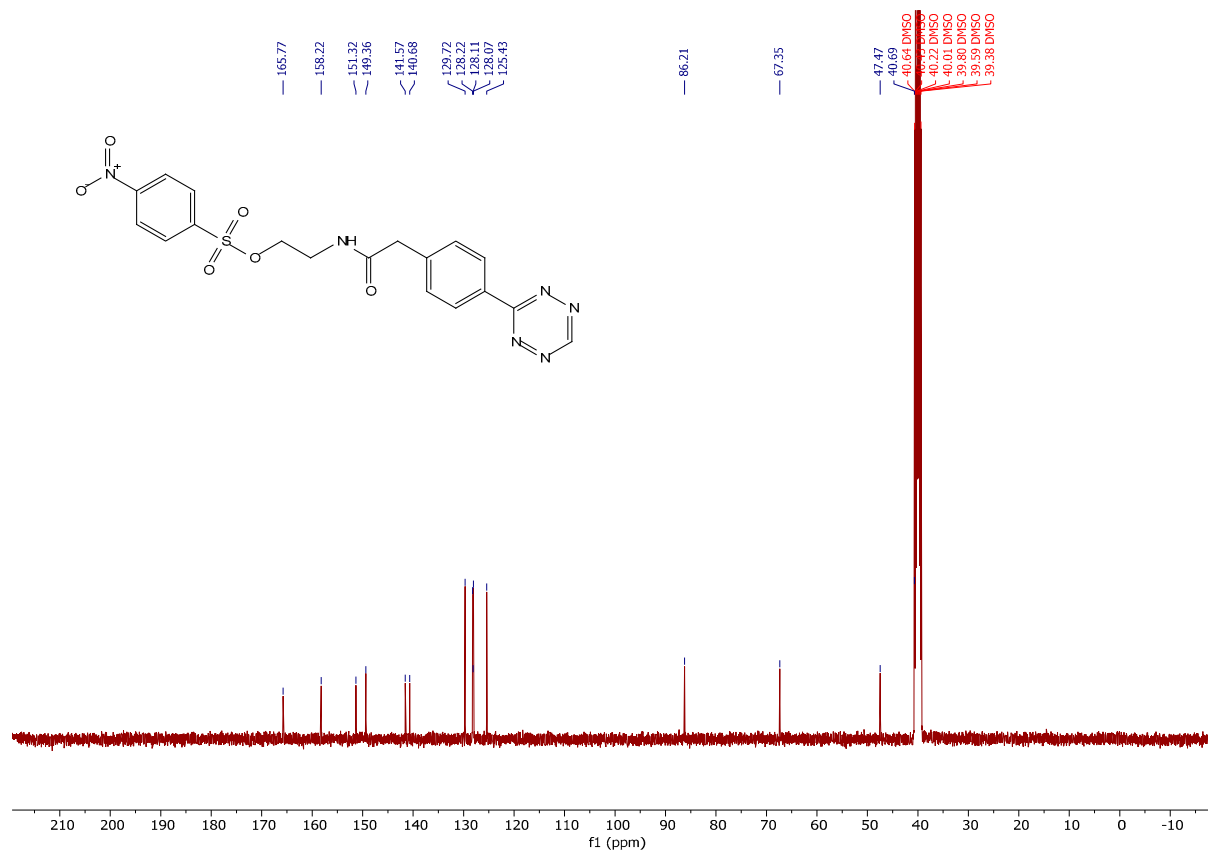



### 3-(4-(2-Fluoroethoxy)phenyl)-1,2,4,5-tetrazine (7)

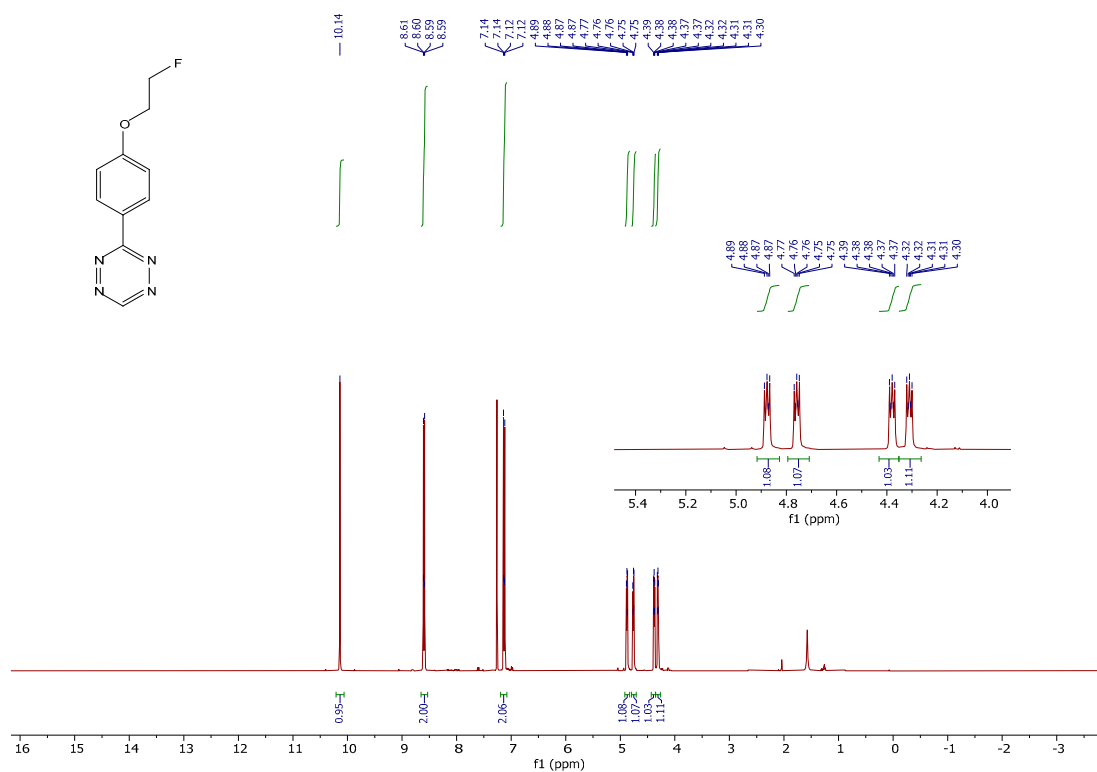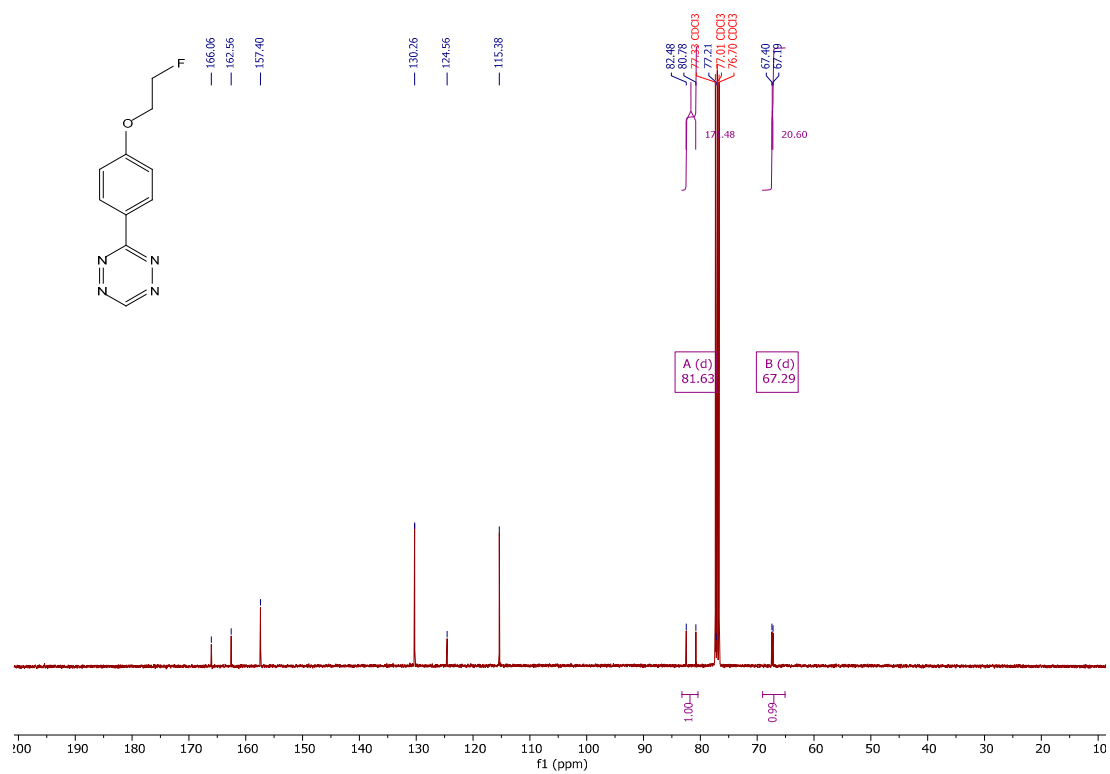

2-(4-(1,2,4,5-Tetrazin-3-yl)phenoxy)ethyl 4-nitrobenzenesulfonate (**7a**)

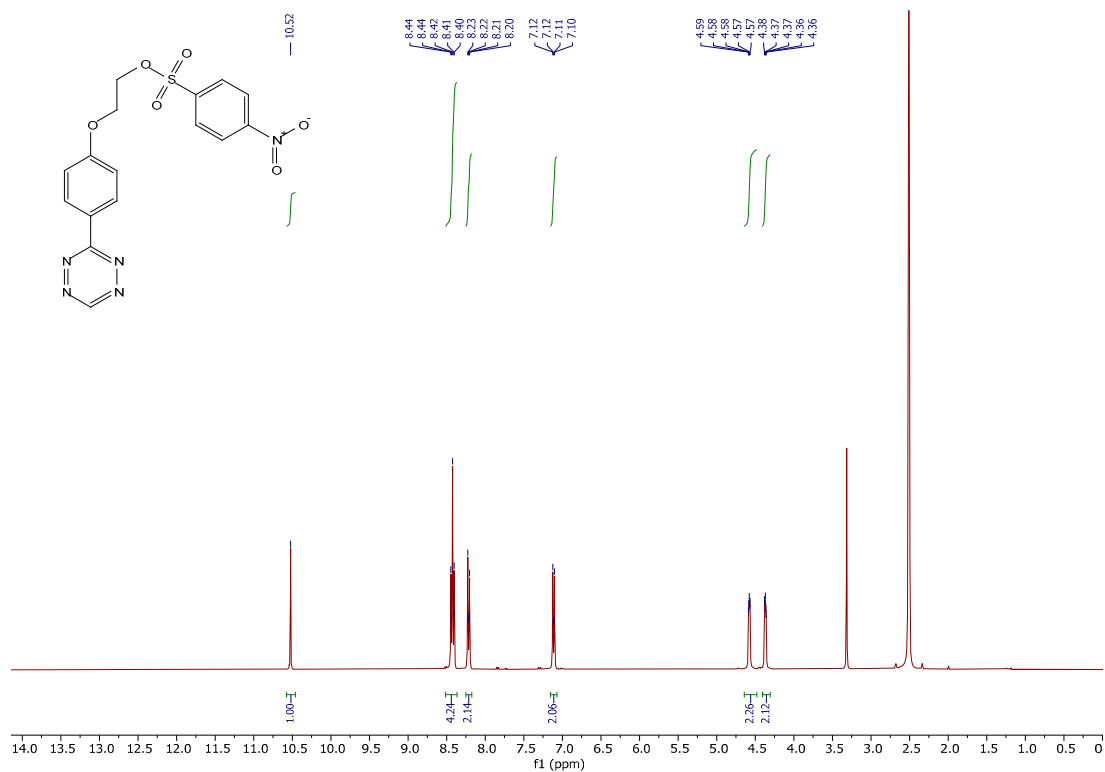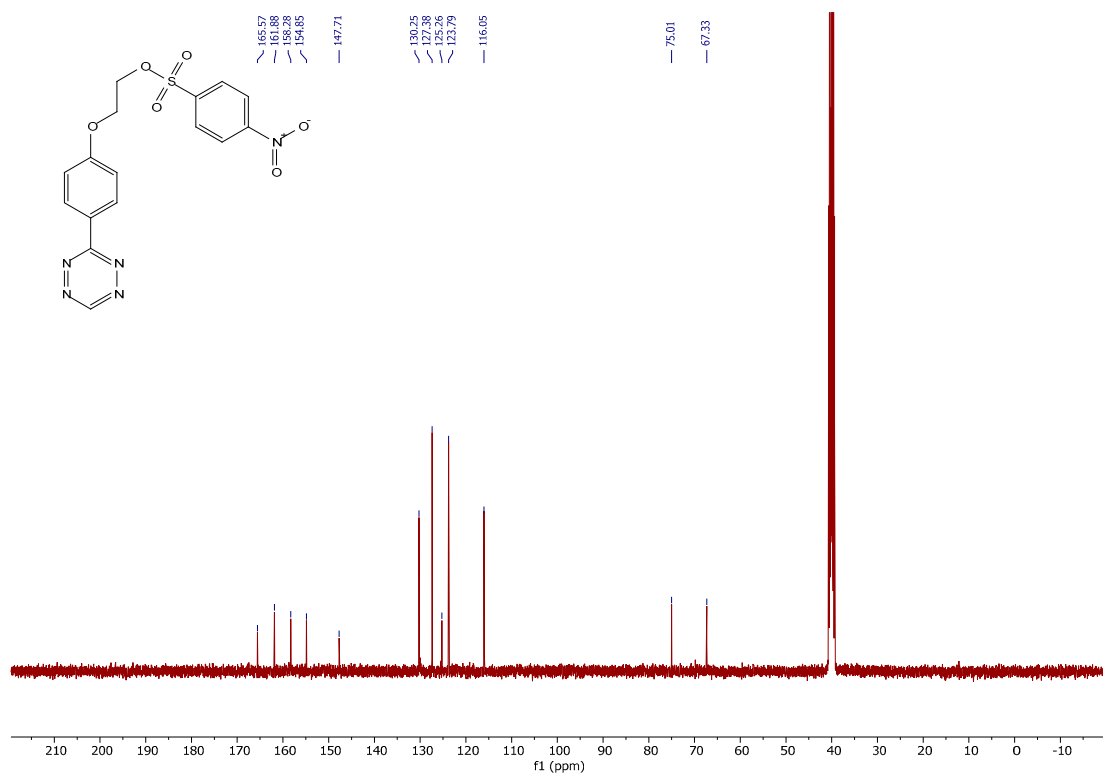

*N*-(4-(1,2,4,5-tetrazin-3-yl)benzyl)-2-fluoroethan-1-amine (9)

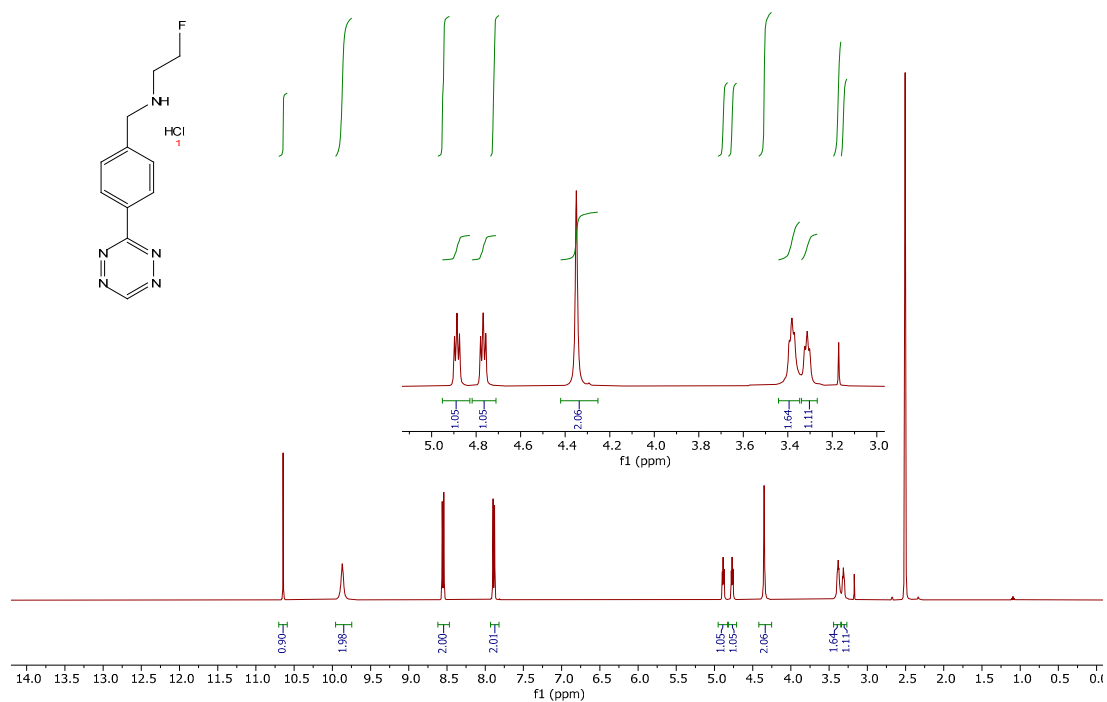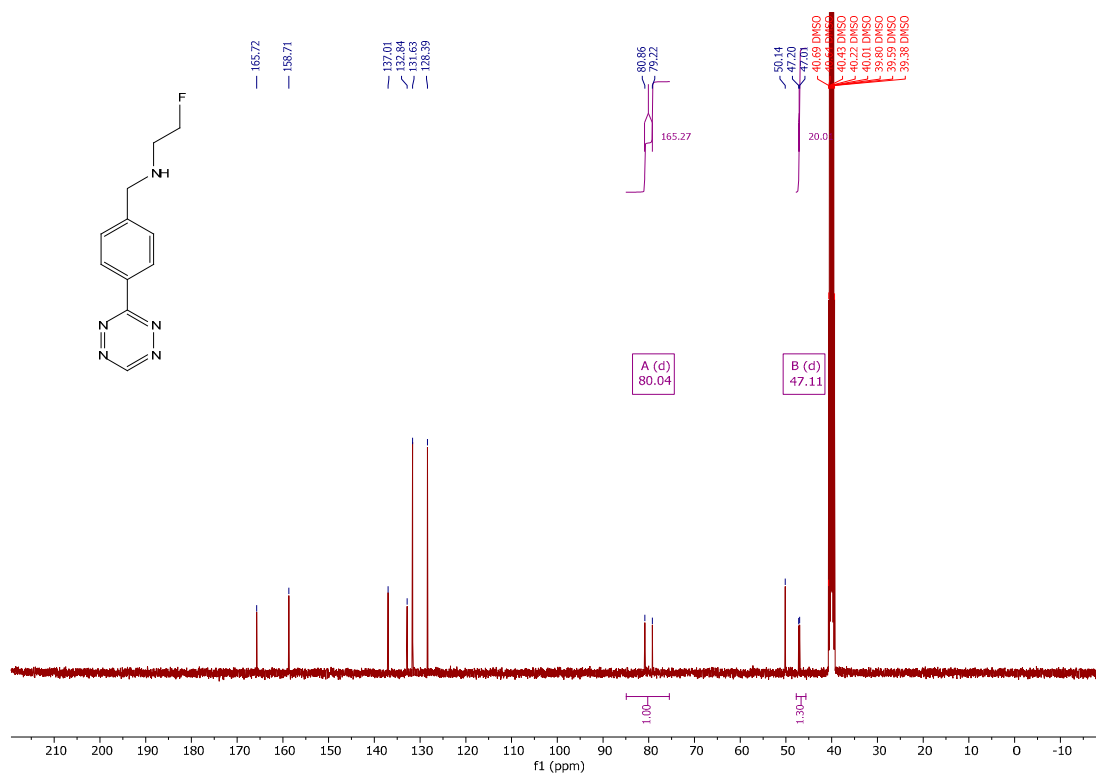

2-((4-(1,2,4,5-Tetrazin-3-yl)benzyl)(trityl)amino)ethyl 4-nitrobenzenesulfonate (**9b**)

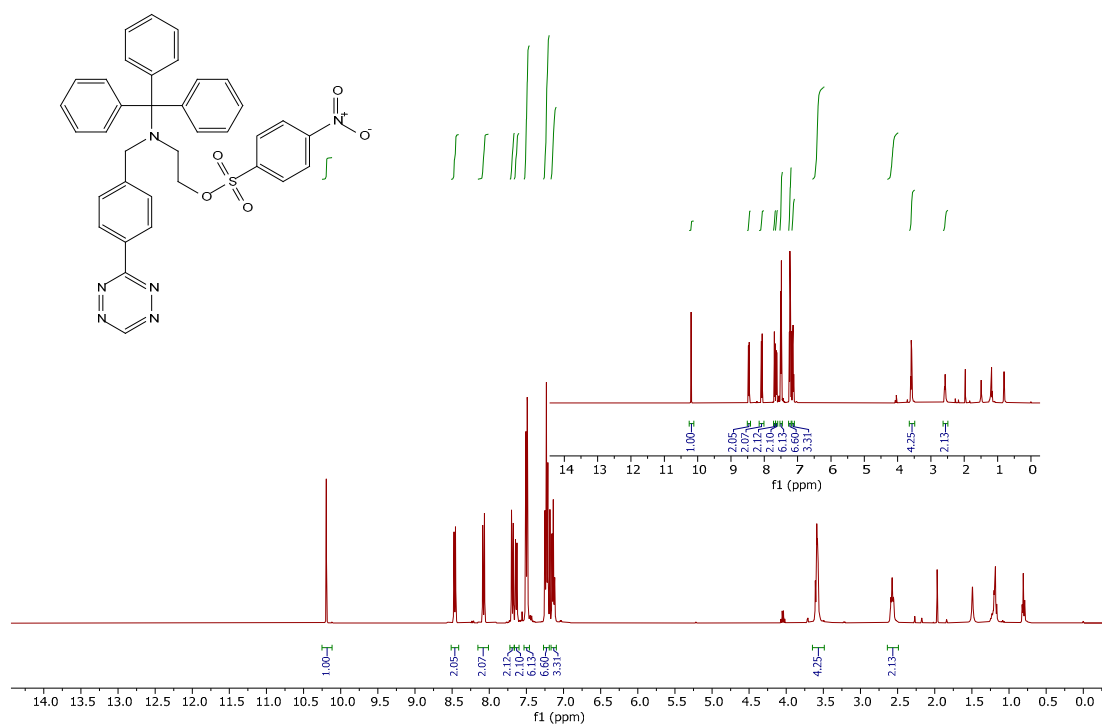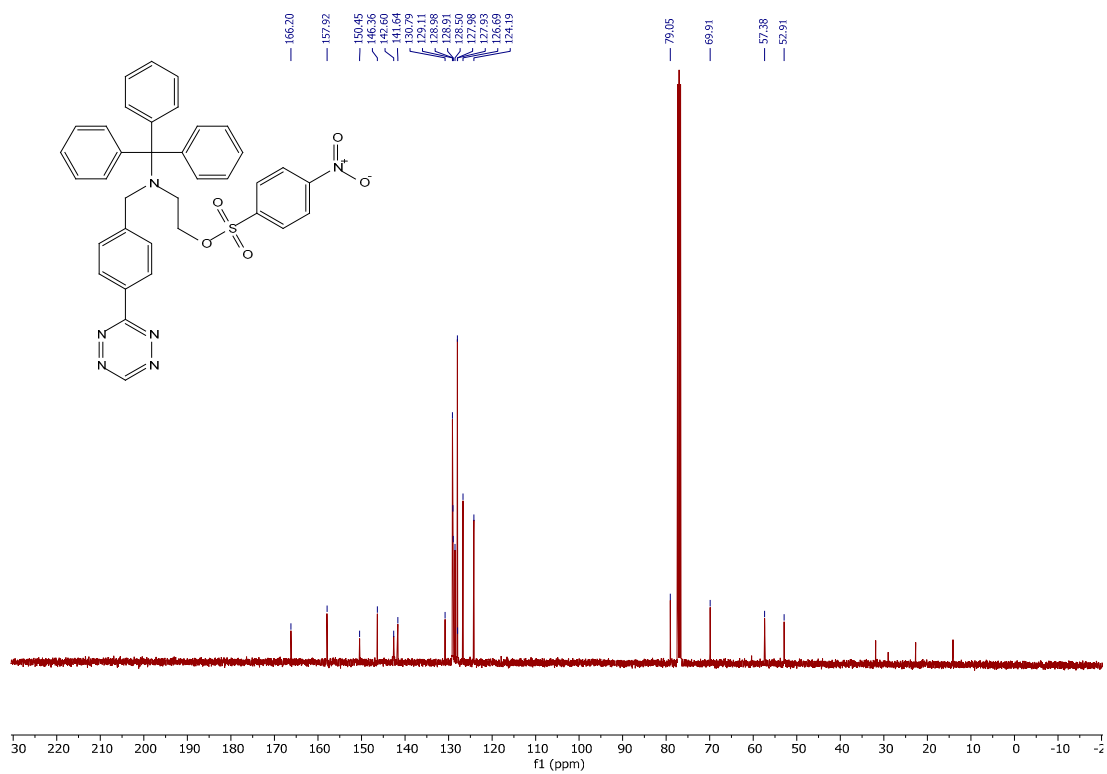

4-(1,2,4,5-tetrazin-3-yl)benzoic acid (**10**)

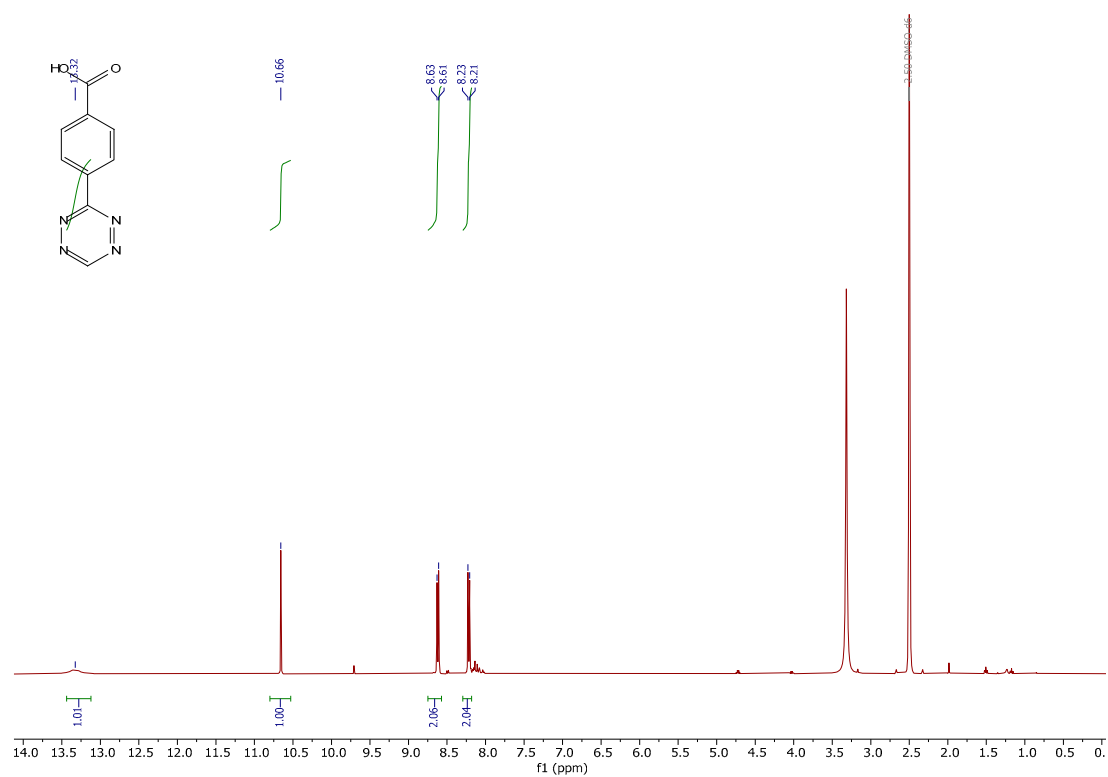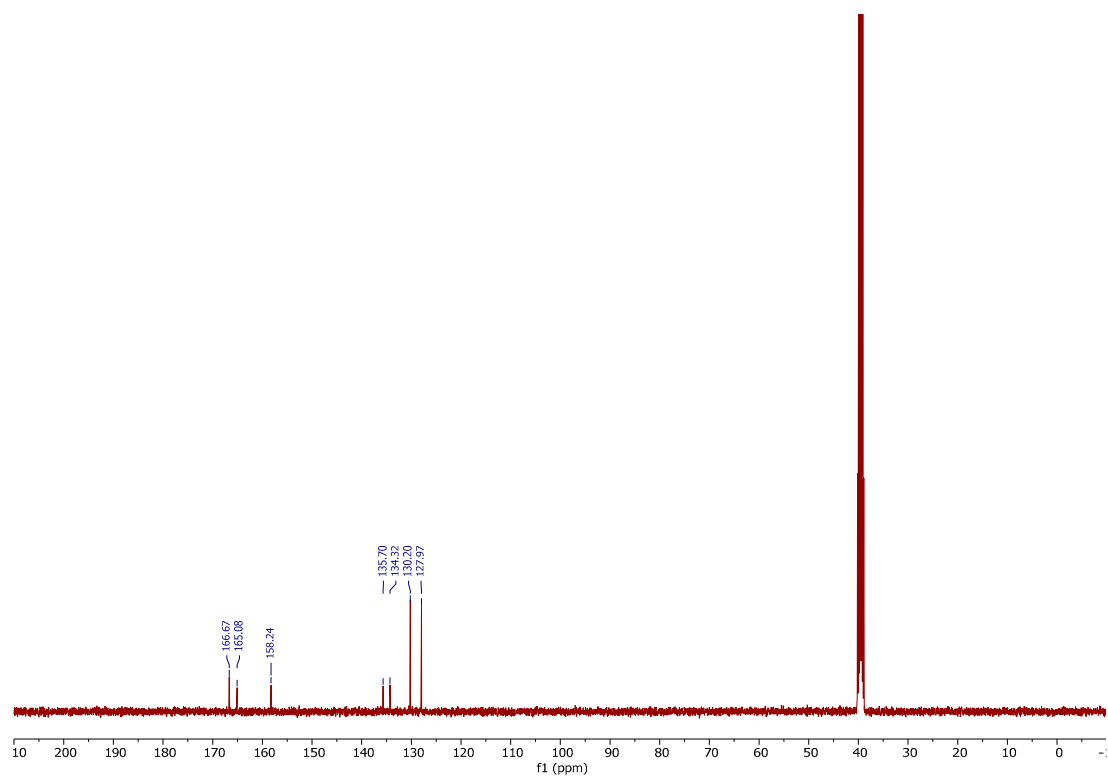

*2-Hydroxyethyl 4-(1,2,4,5-tetrazin-3-yl)benzoate (11)*

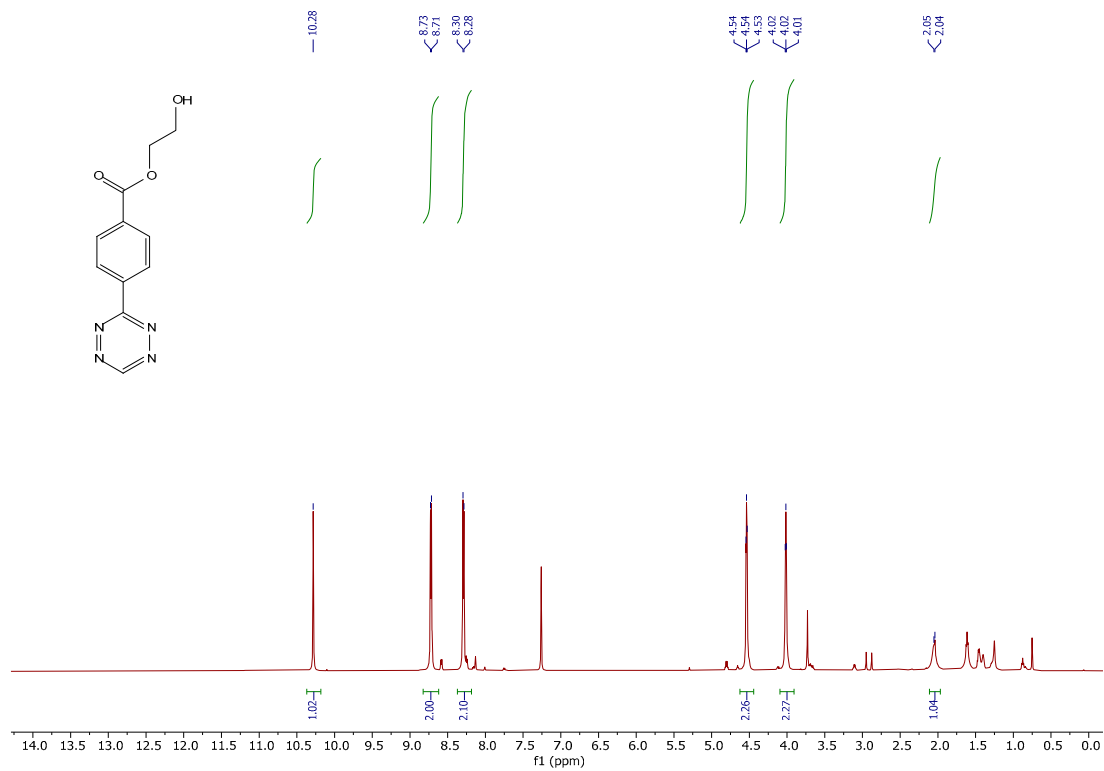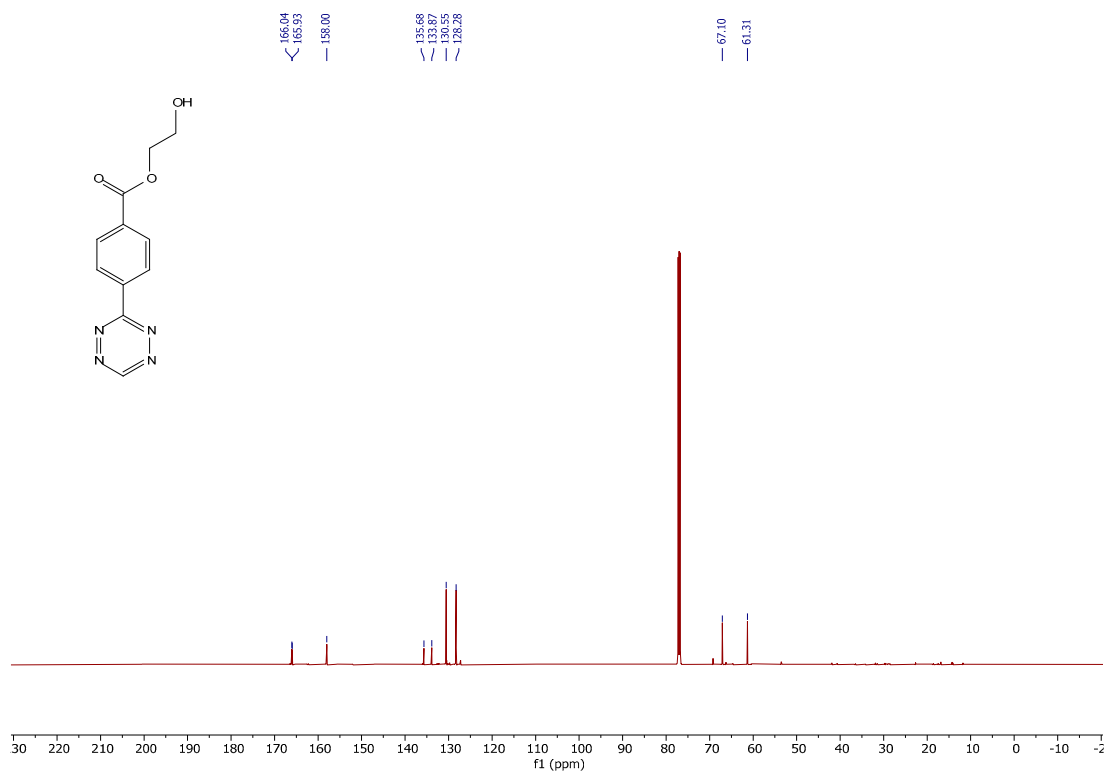

4-Cyano-N-(2-fluoroethyl)benzamide (**12**)

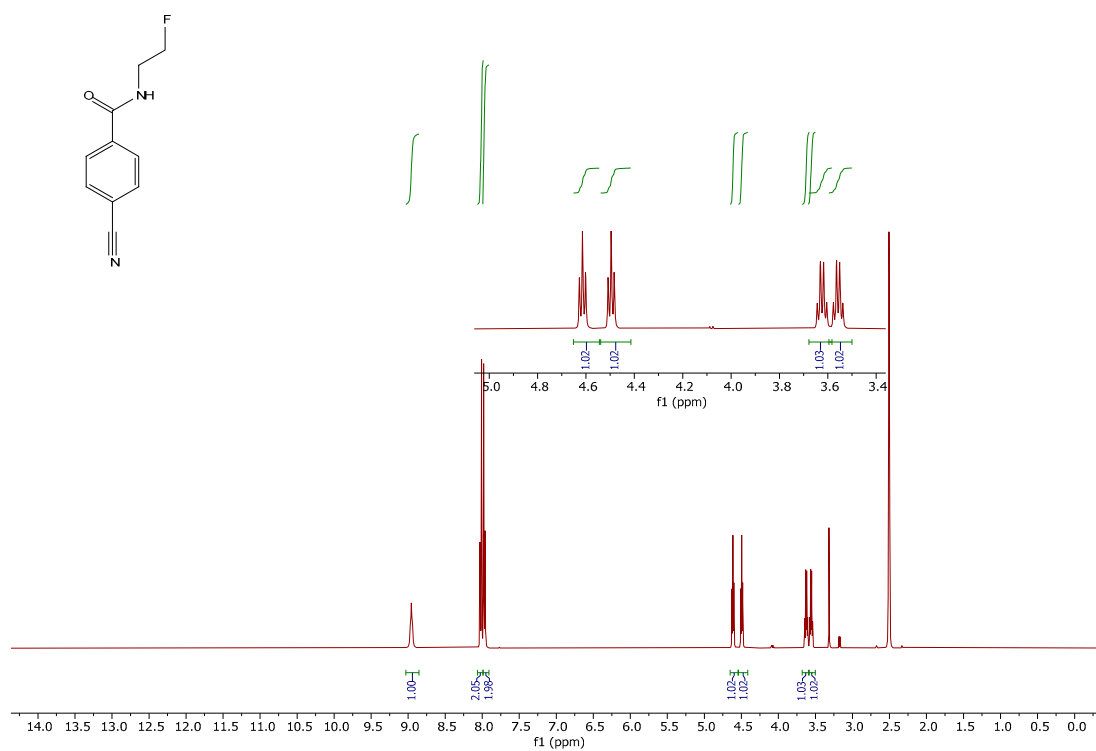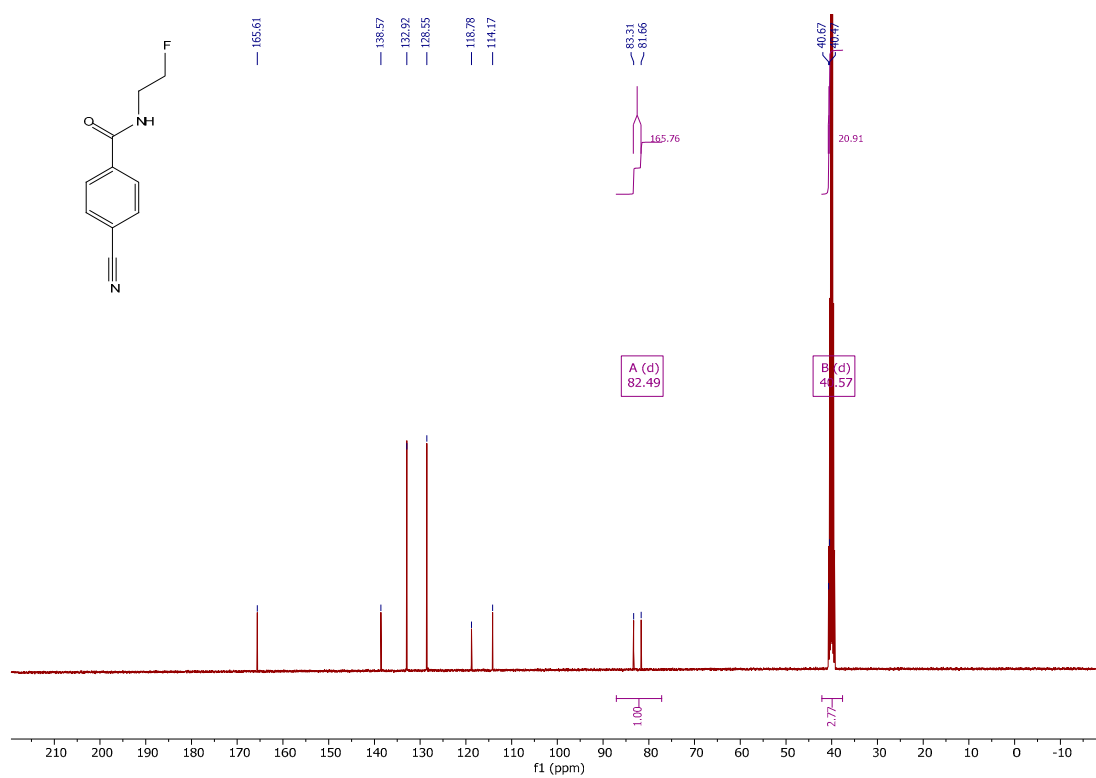

**4-Cyano-N-(2-hydroxyethyl)benzamide (13)**

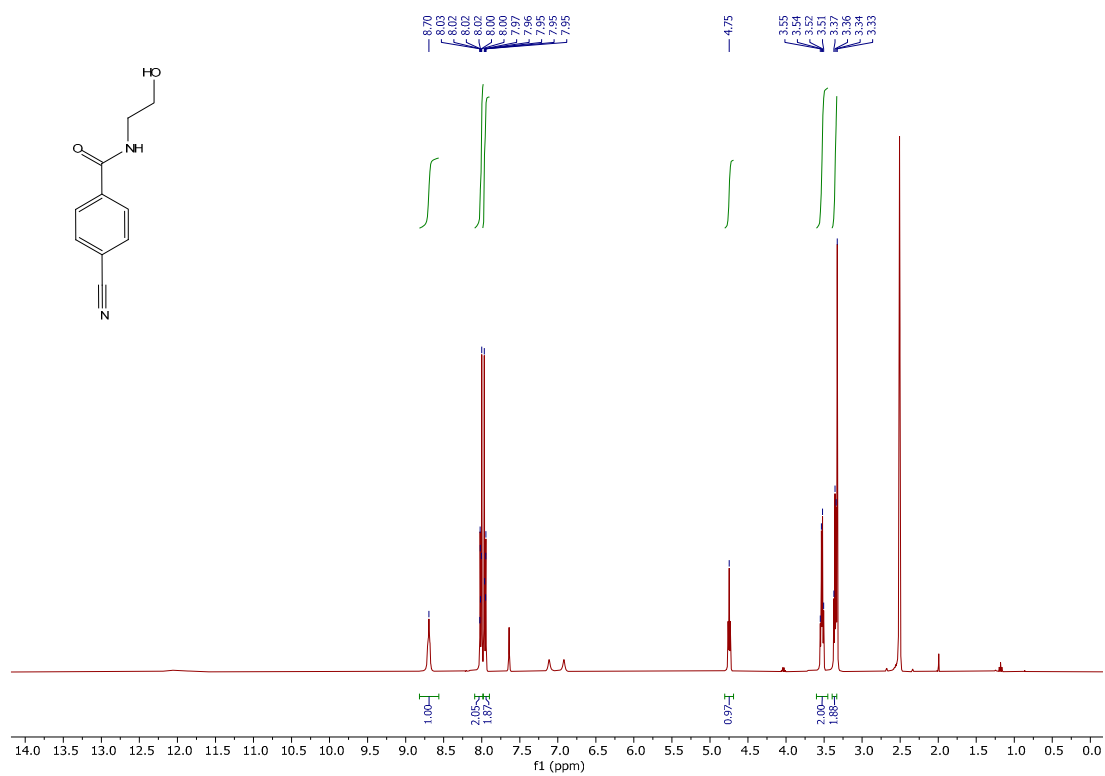



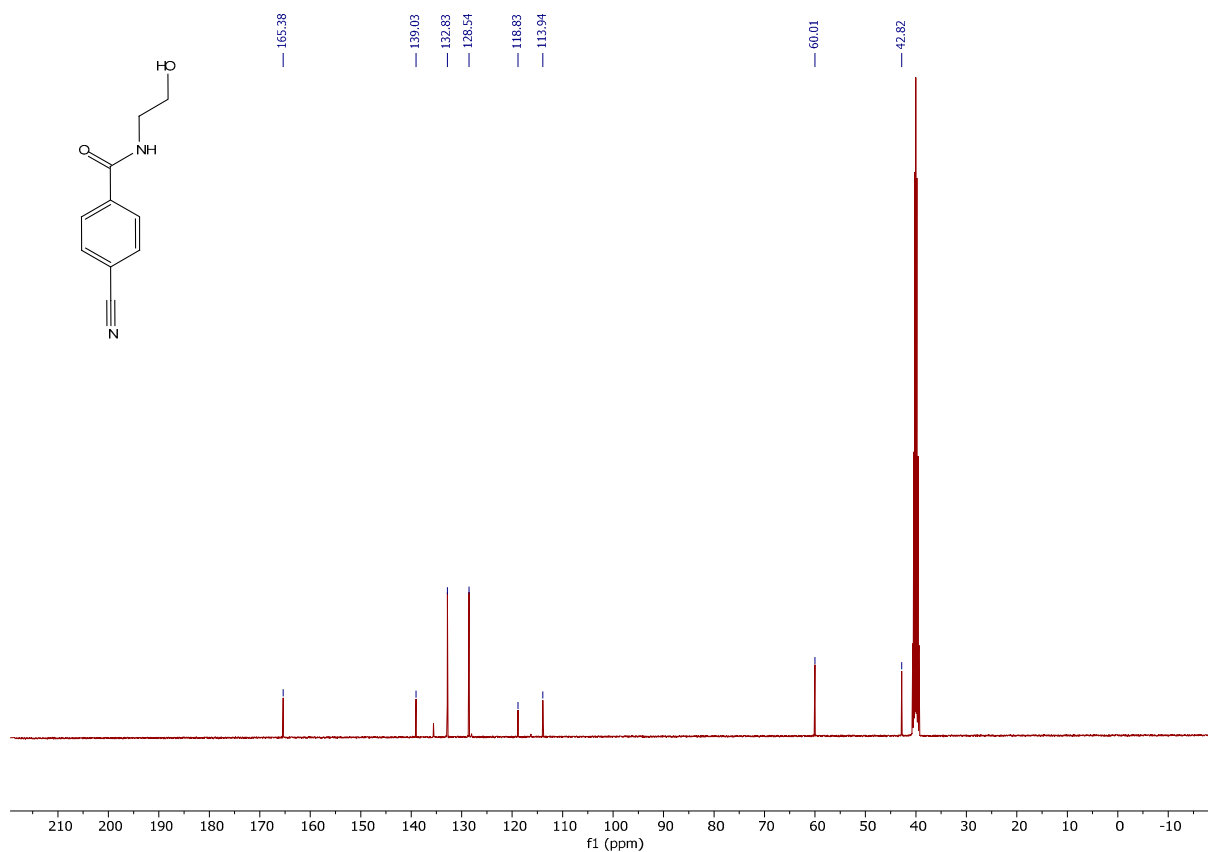

*N*-(2-hydroxyethyl)-4-(1,2,4,5-tetrazin-3-yl)benzamide (**14**)

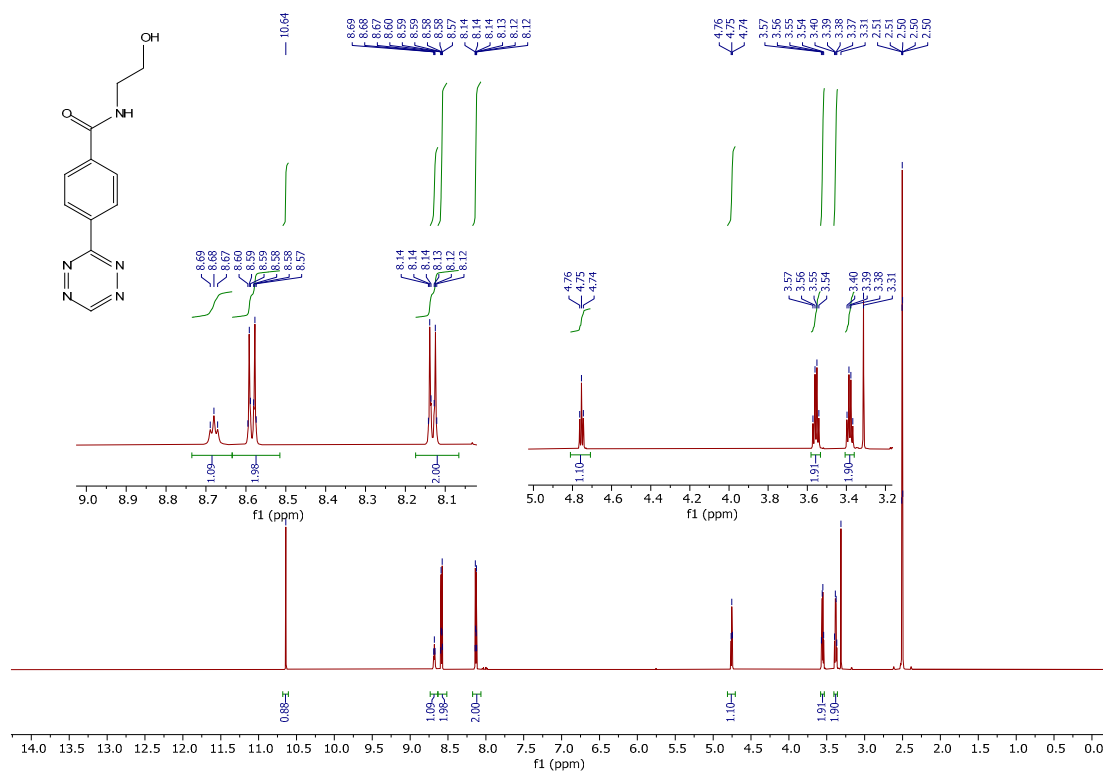

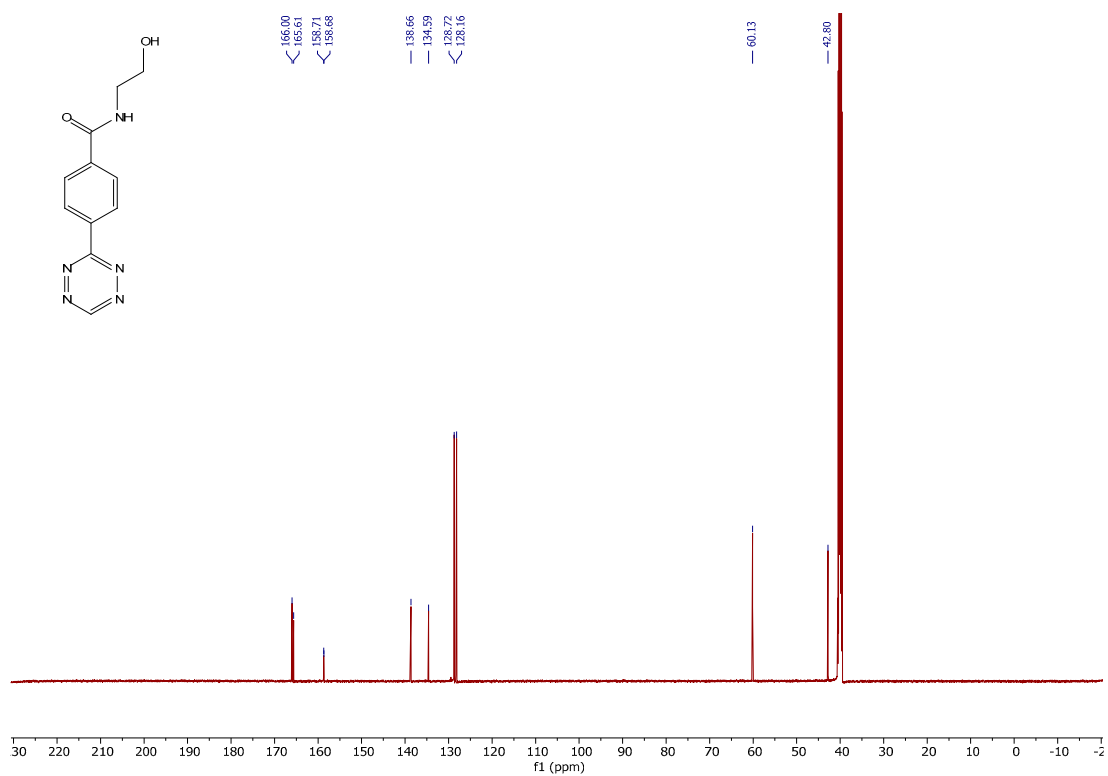

*2-(4-(1,2,4,5-Tetrazin-3-yl)phenyl)-4,5-dihydrooxazole*

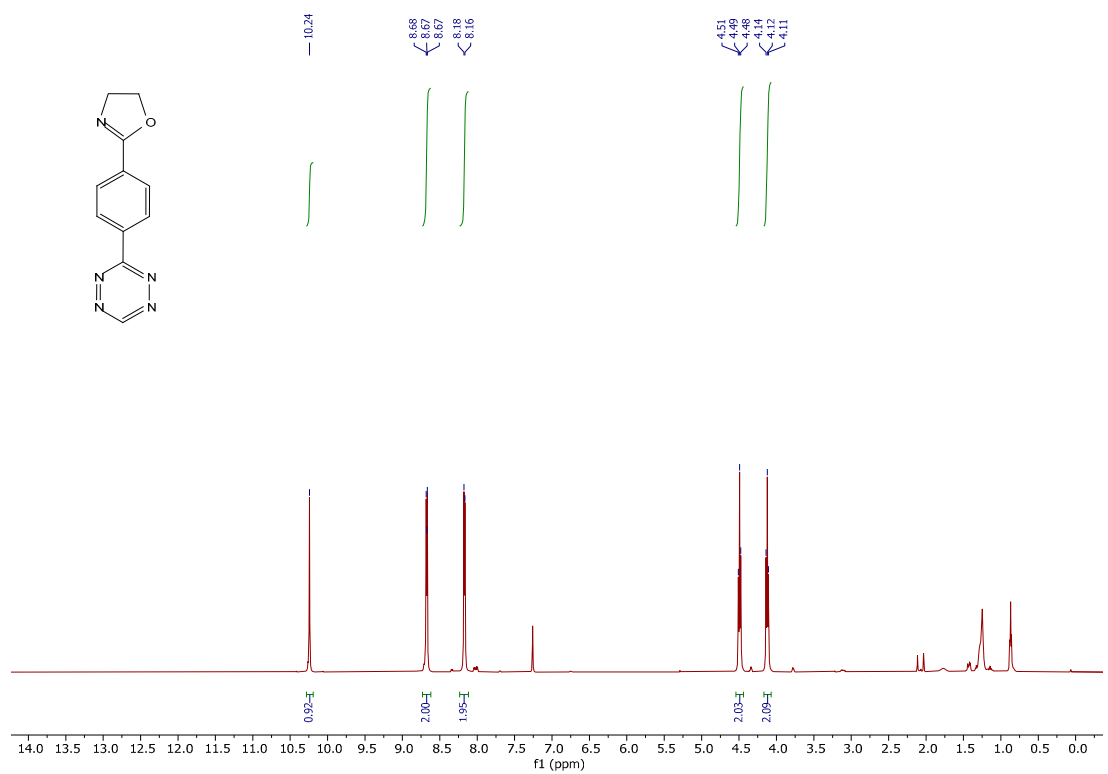

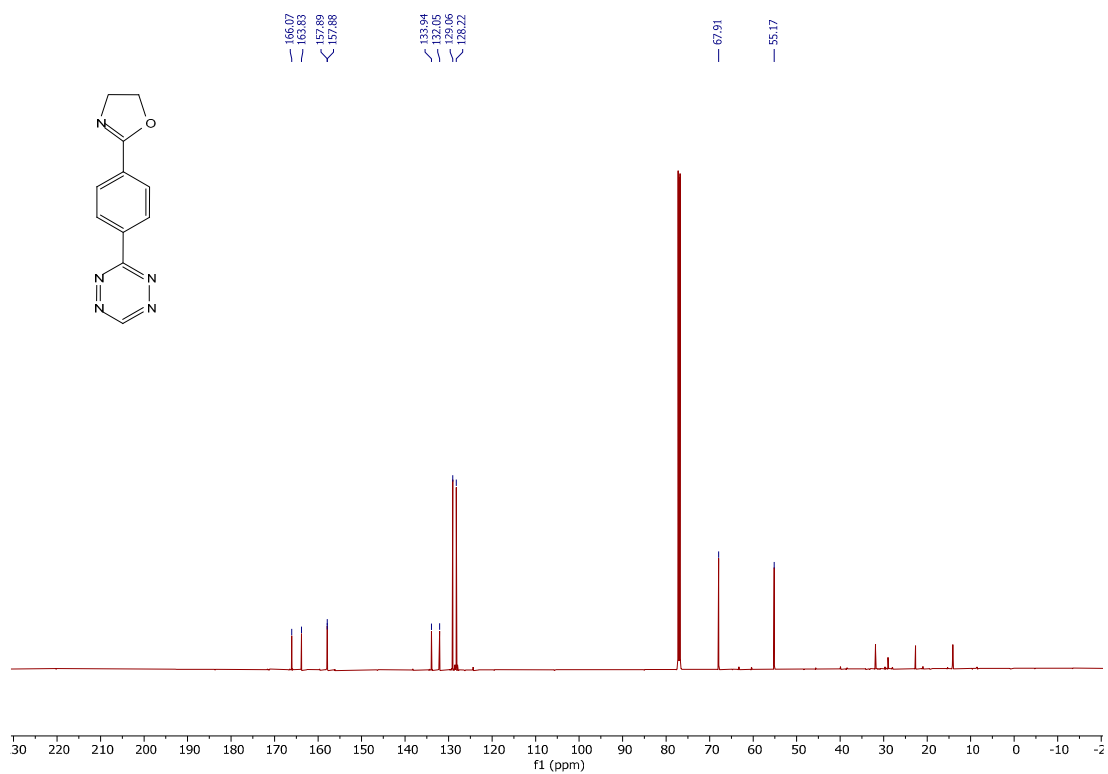

2-(4-(1,2,4,5-Tetrazin-3-yl)phenyl)acetic acid (**15**)

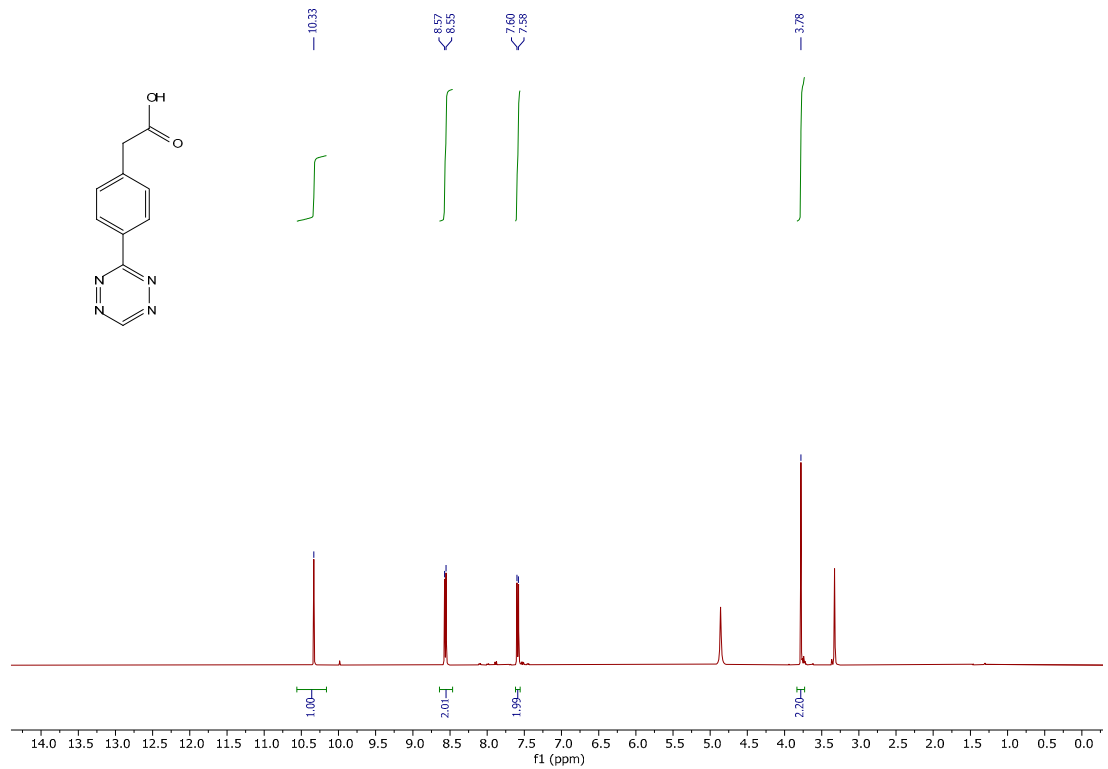

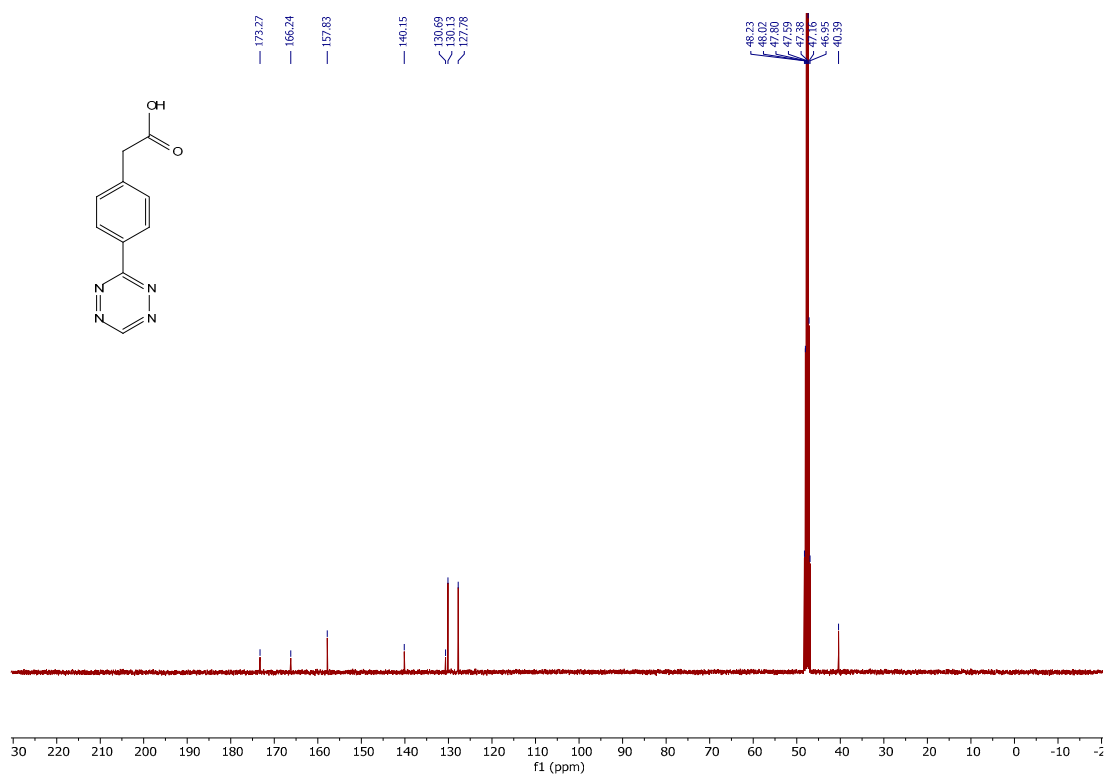

*2-Hydroxyethyl 2-(4-(1,2,4,5-tetrazin-3-yl)phenyl)acetate (16)*

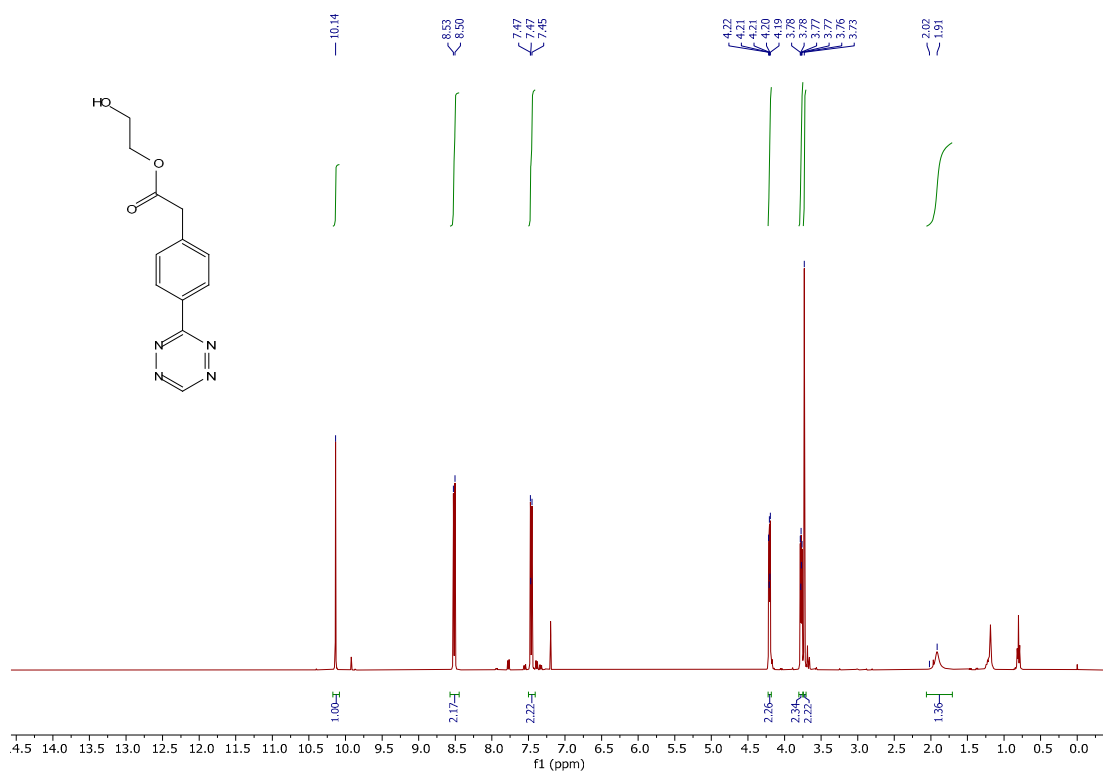

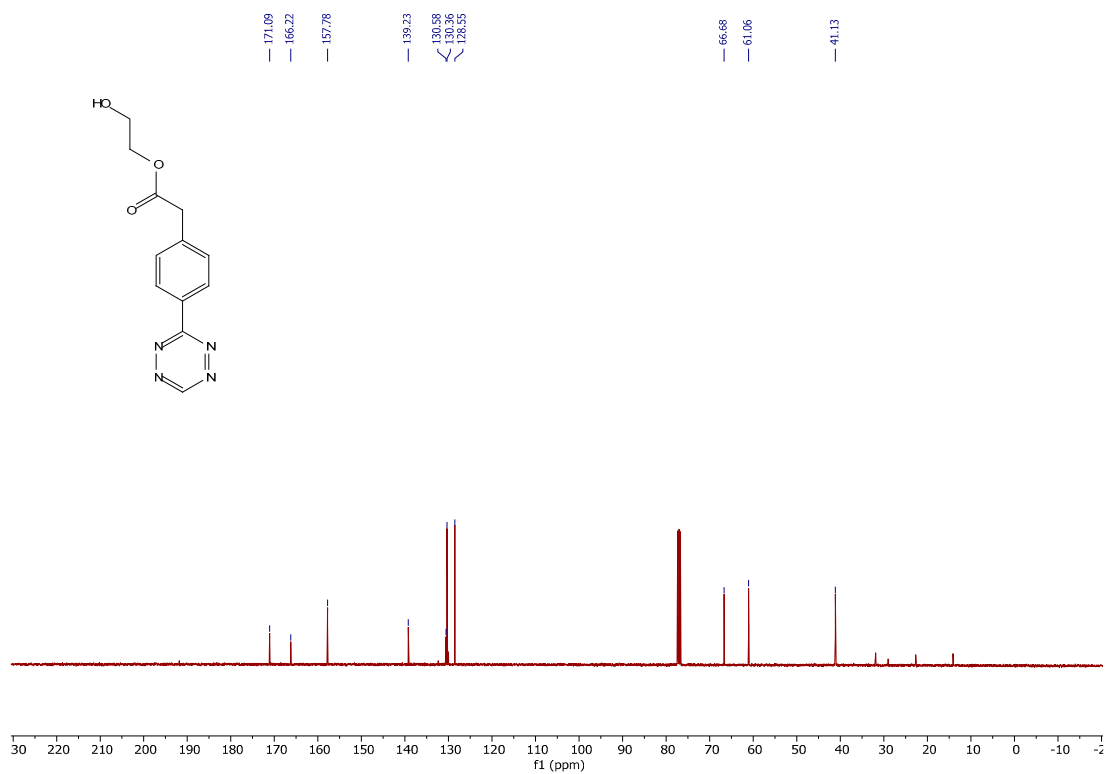

2-(4-Cyanophenyl)-N-(2-fluoroethyl)acetamide (**17**)

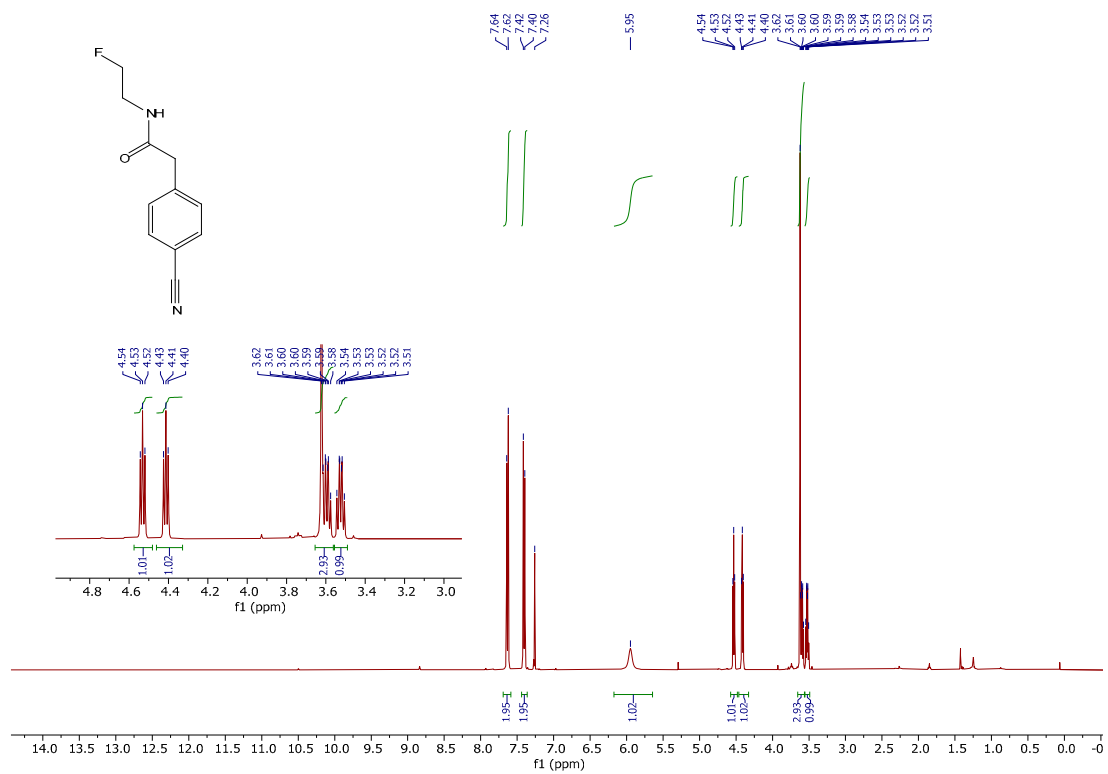



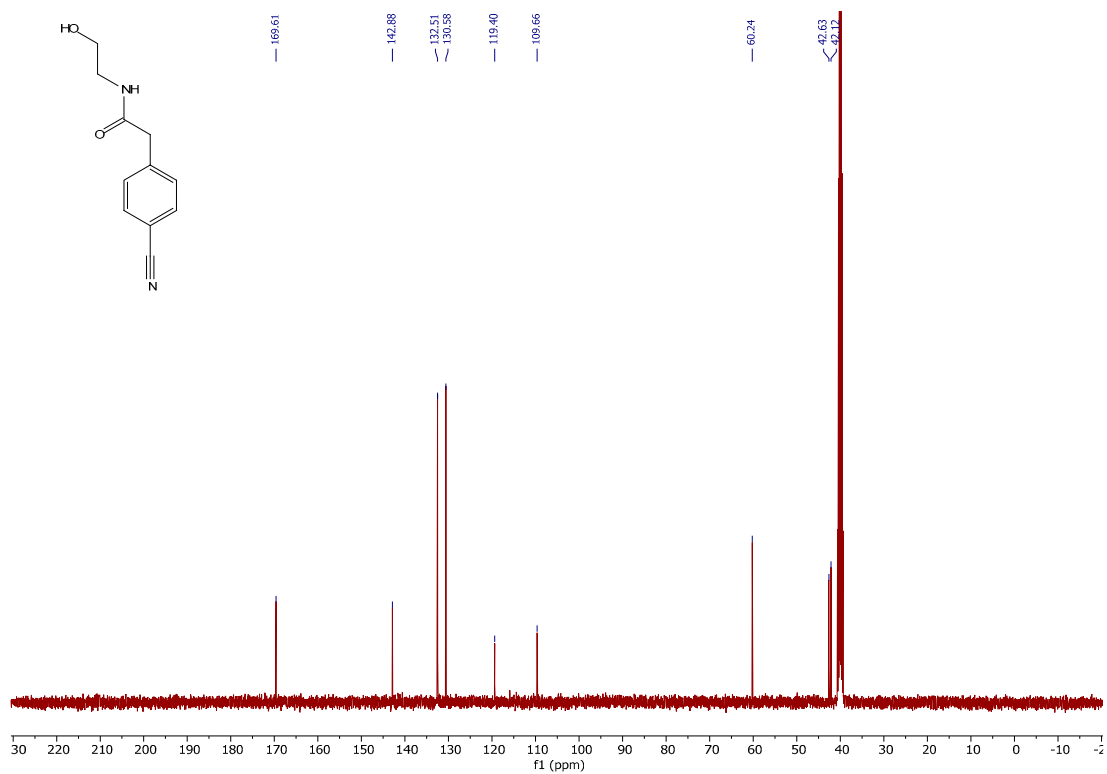

2-(4-(1,2,4,5-Tetrazin-3-yl)phenyl)-N-(2-hydroxyethyl)acetamide (19)

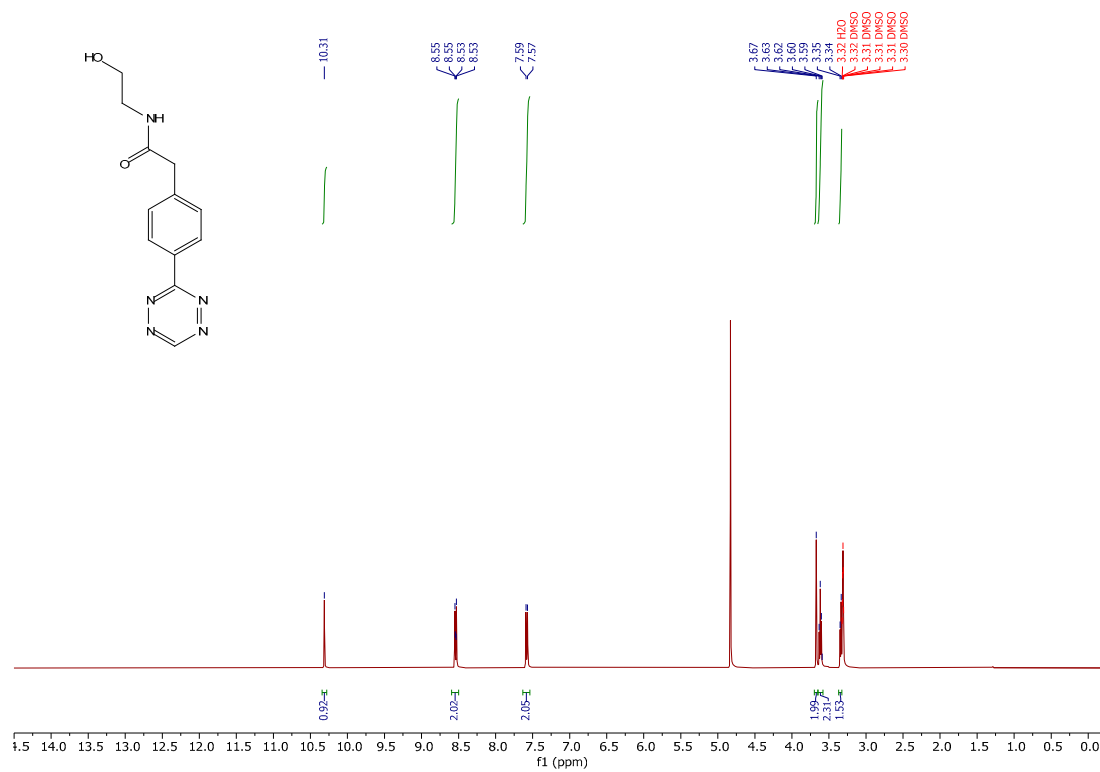

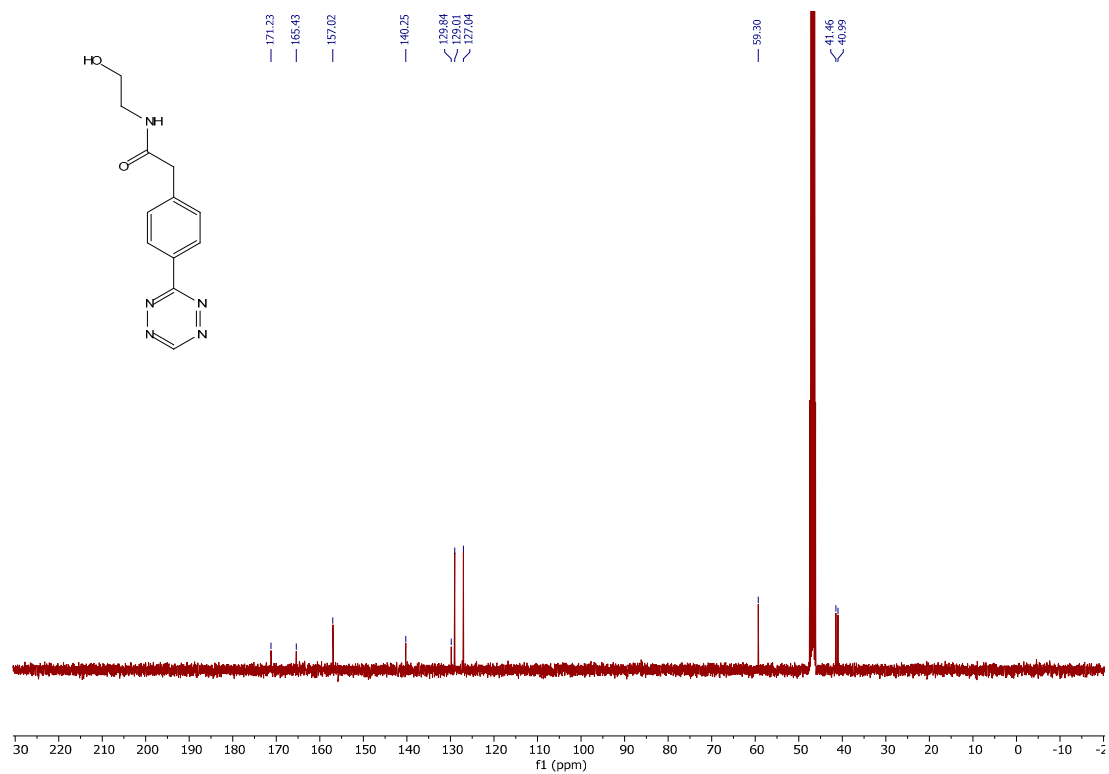

*4-(2-Fluoroethoxy)benzonitrile (20)*

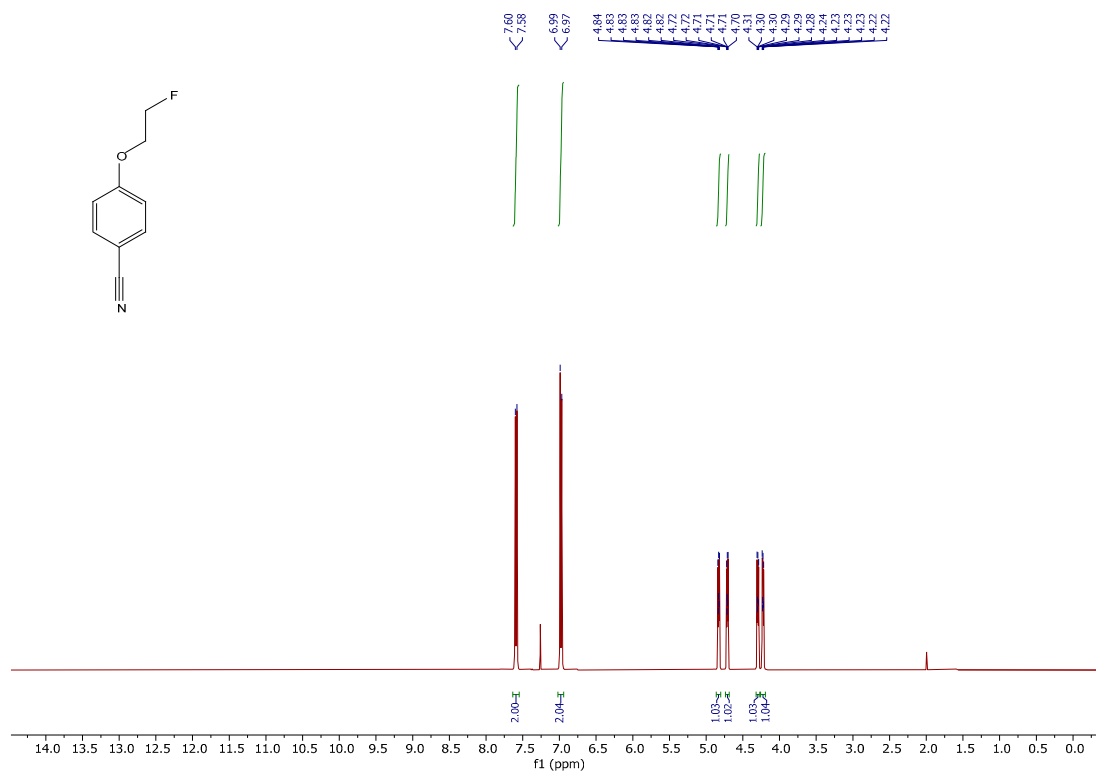



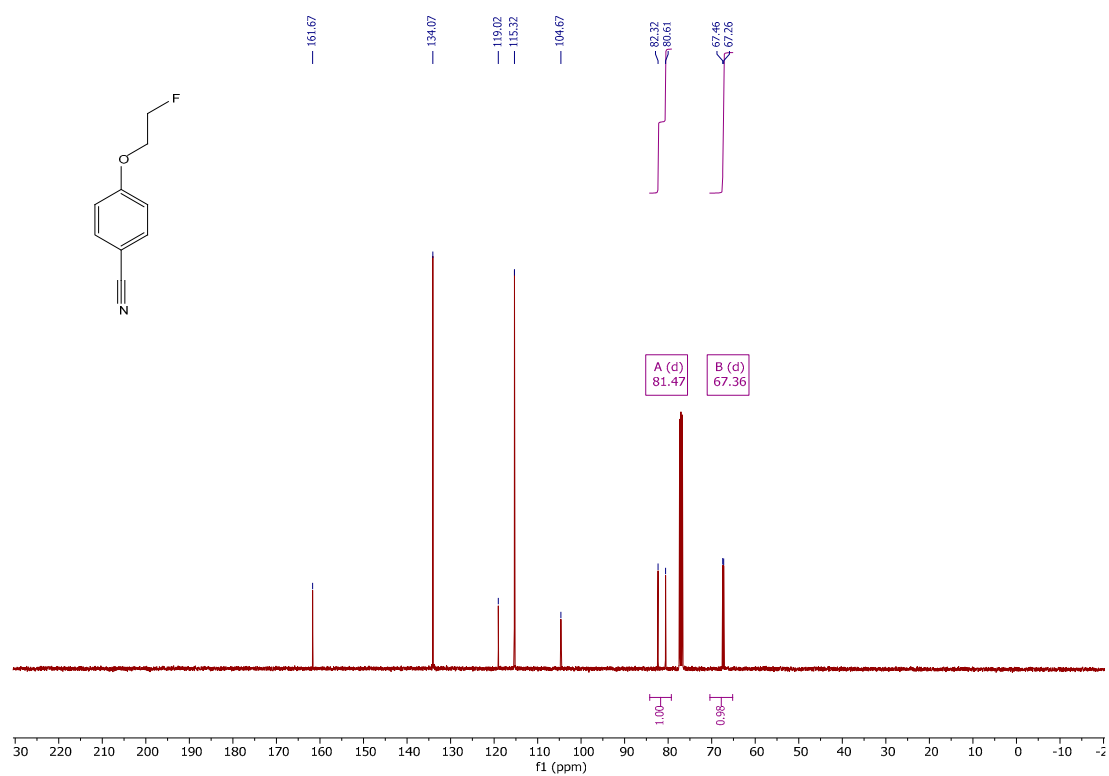

### 4-(2-Hydroxyethoxy)benzonitrile (21)

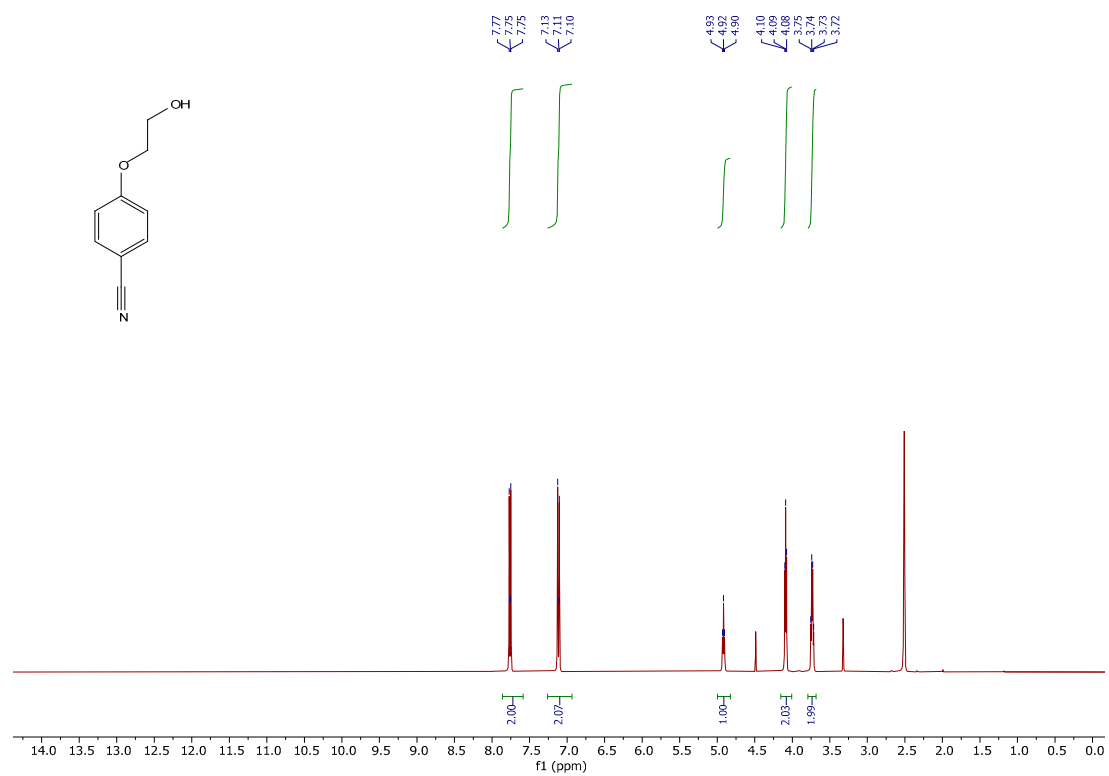

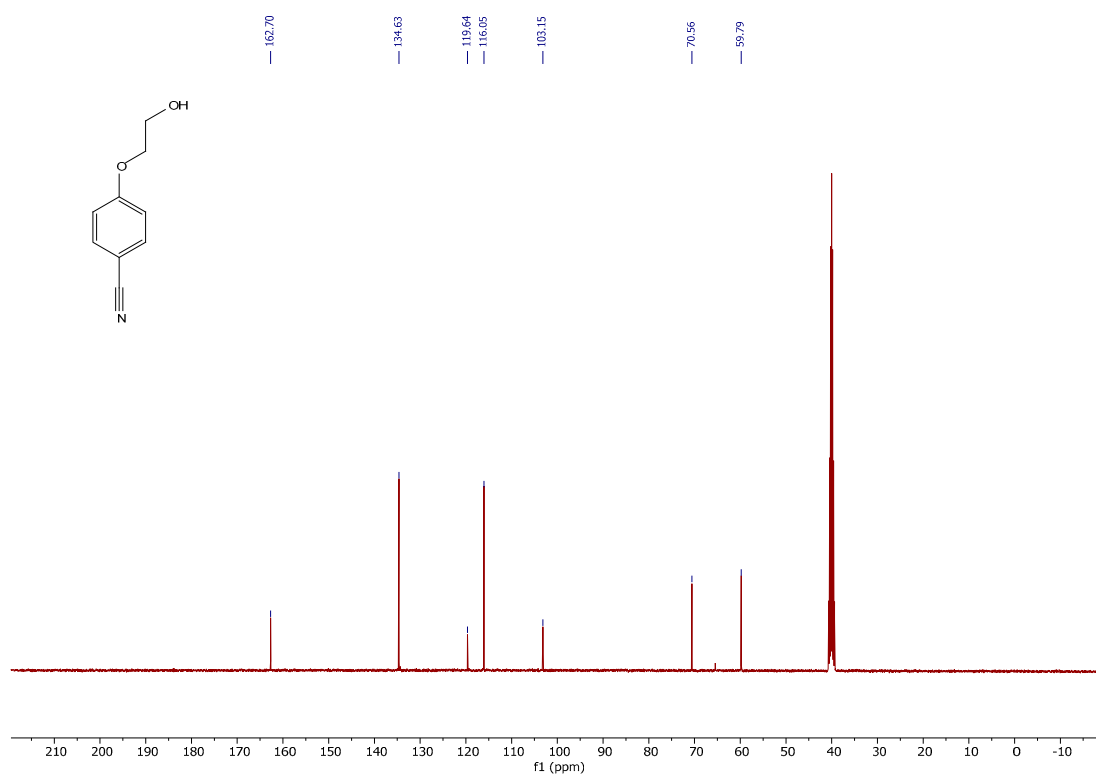

2-(4-(1,2,4,5-Tetrazin-3-yl)phenoxy)ethan-1-ol (22)

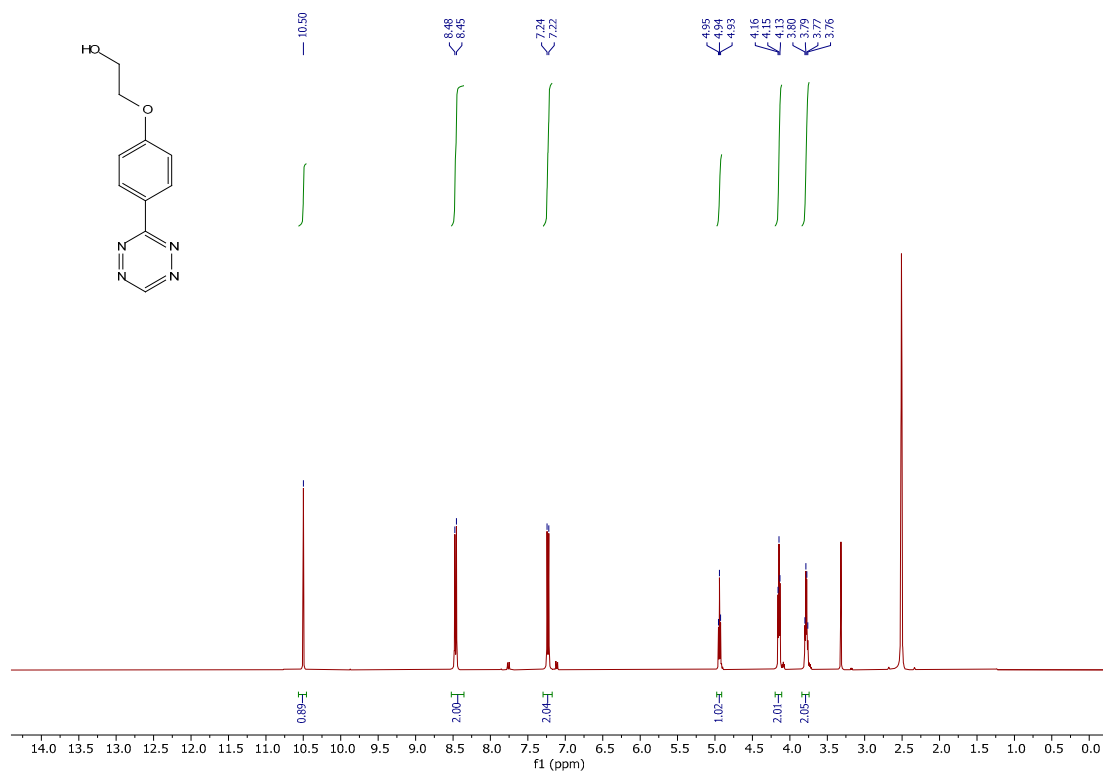

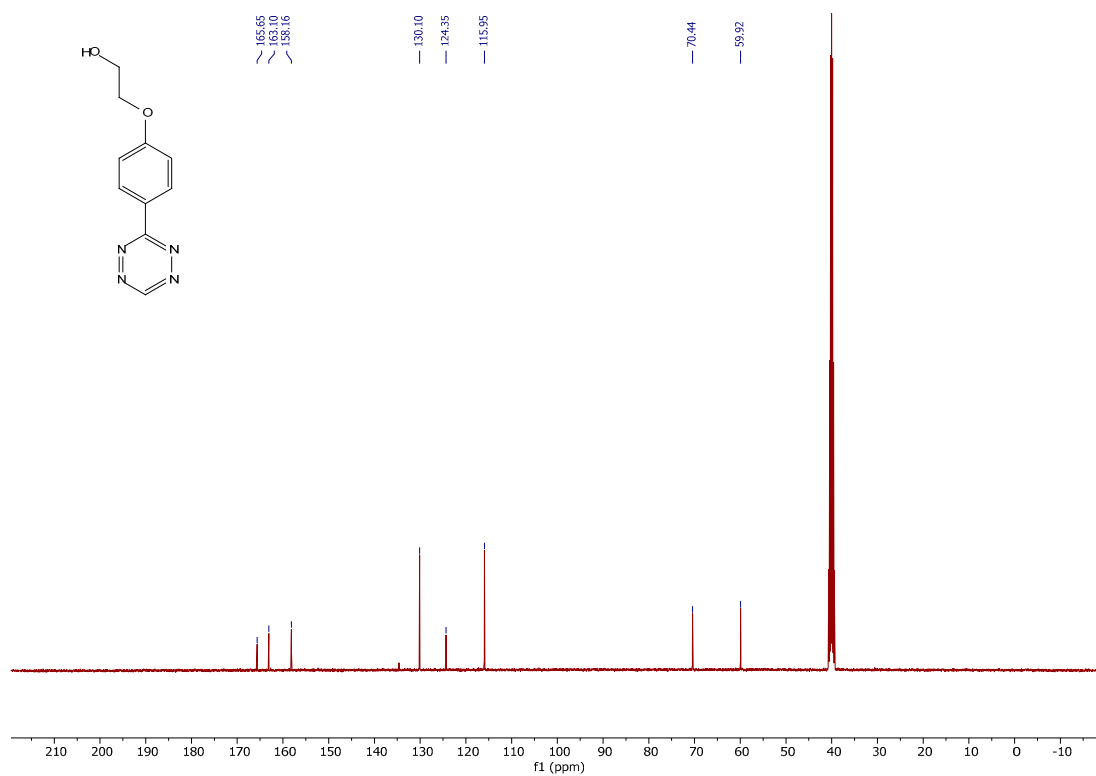

4-(((2-Fluoroethyl)amino)methyl)benzonitrile (**23**)

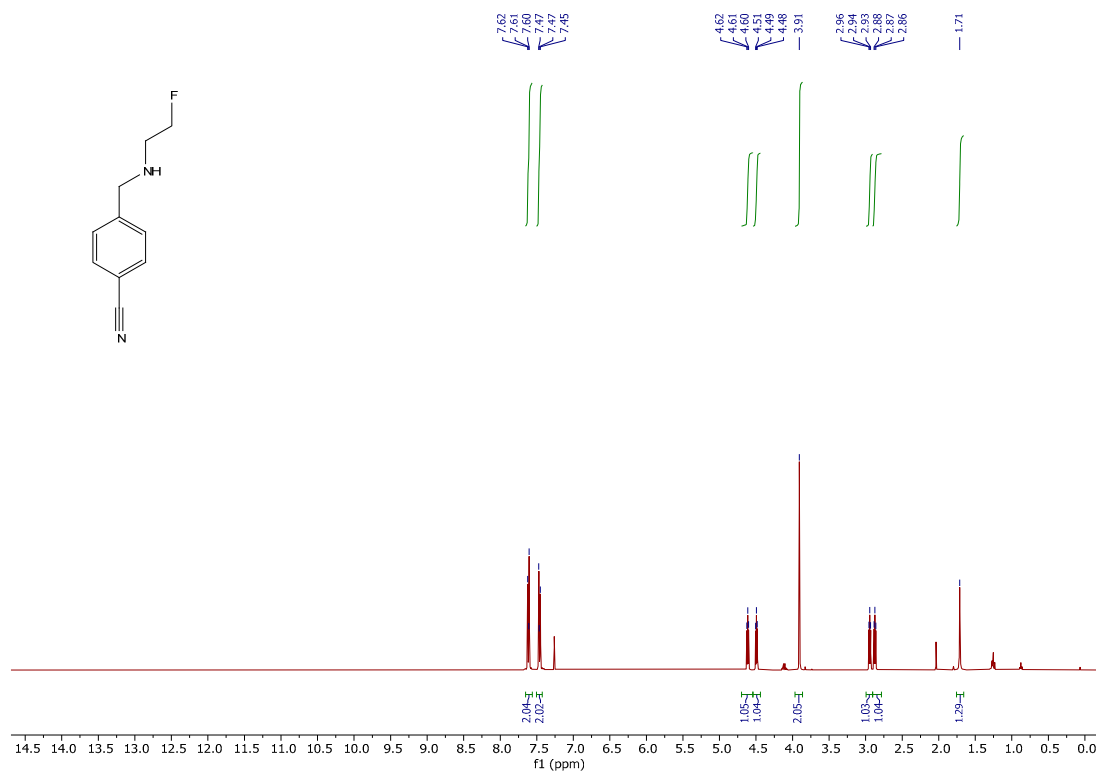

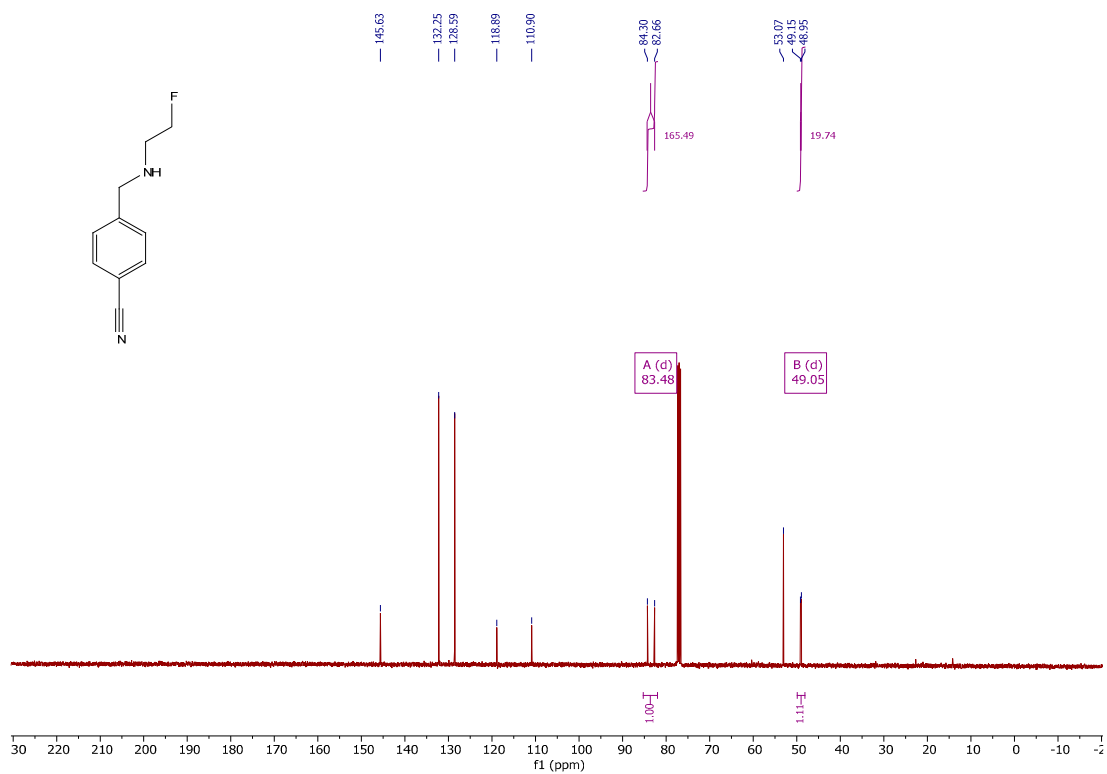

4-(((2-Hydroxyethyl)amino)methyl)benzonitrile (24)

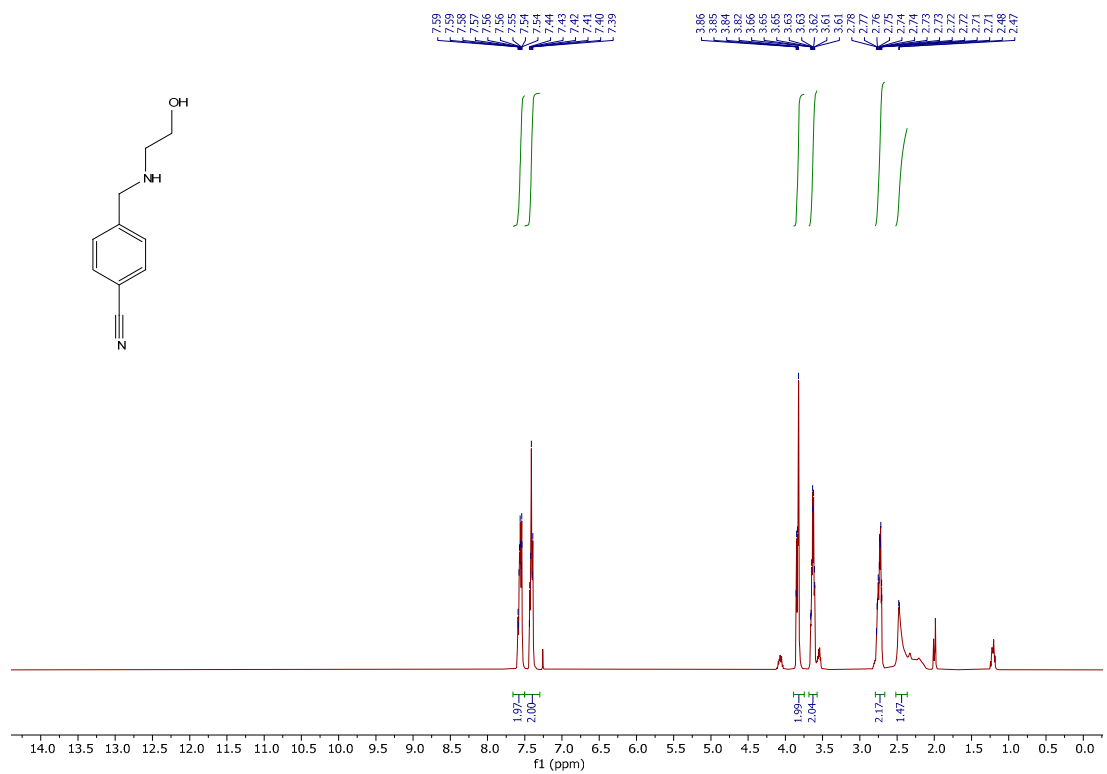

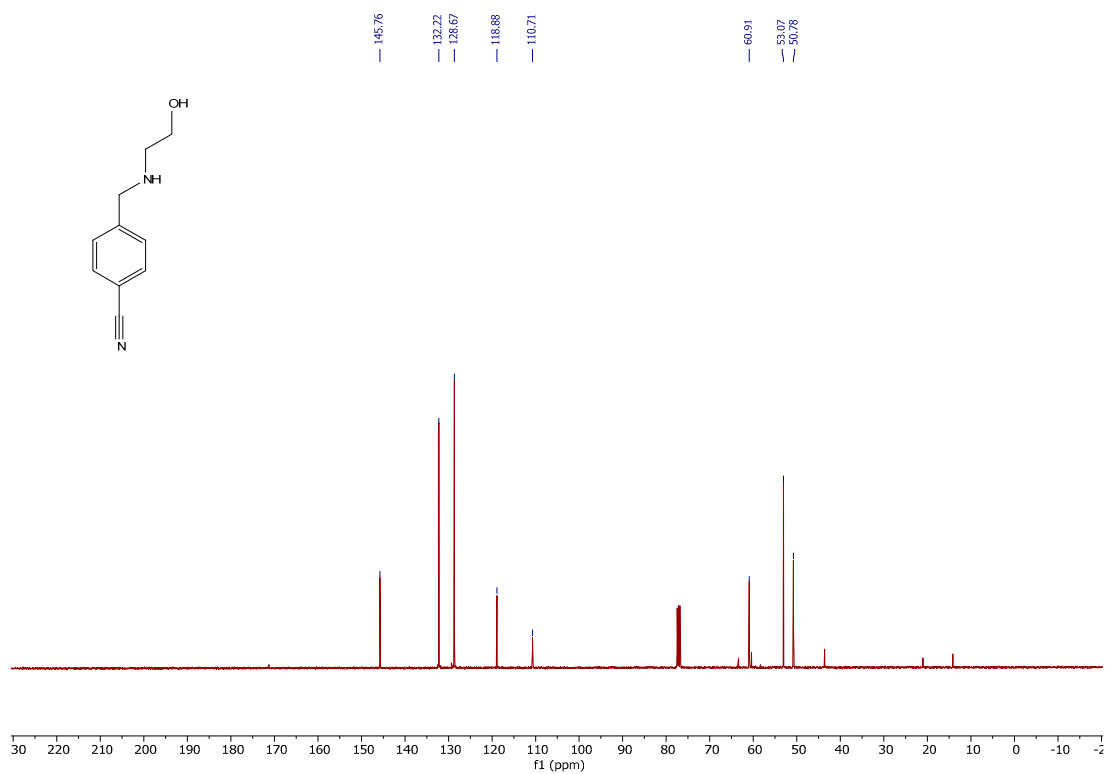

*Tert-butyl 4-cyanobenzyl(2-fluoroethyl)carbamate (25)*

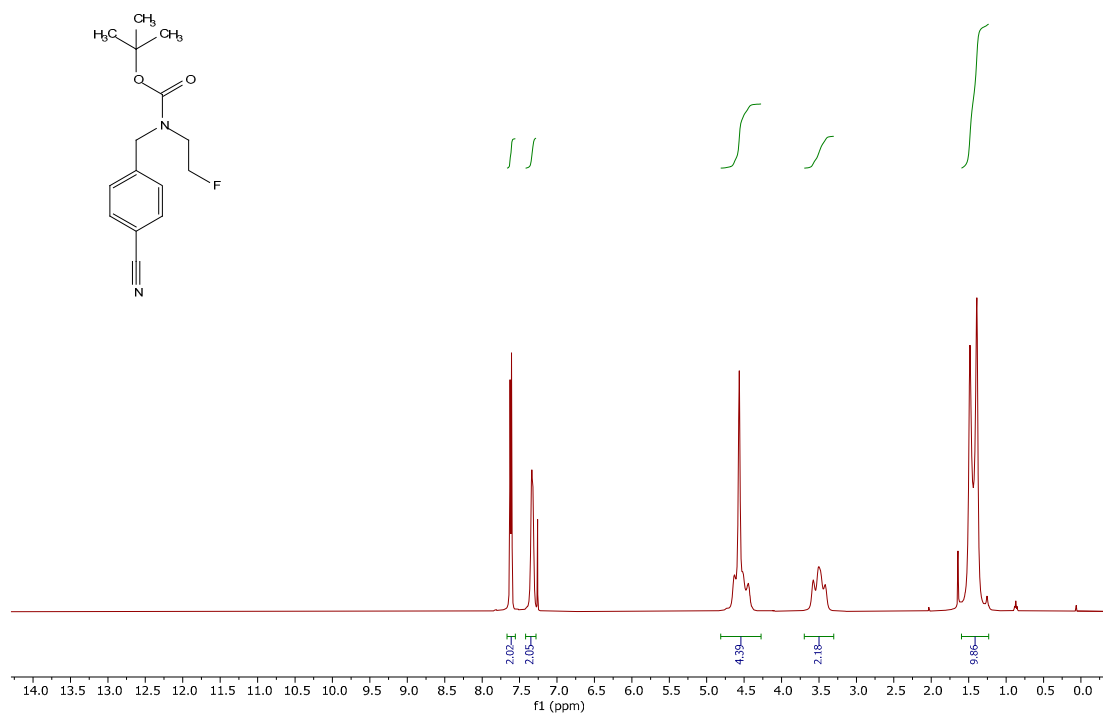

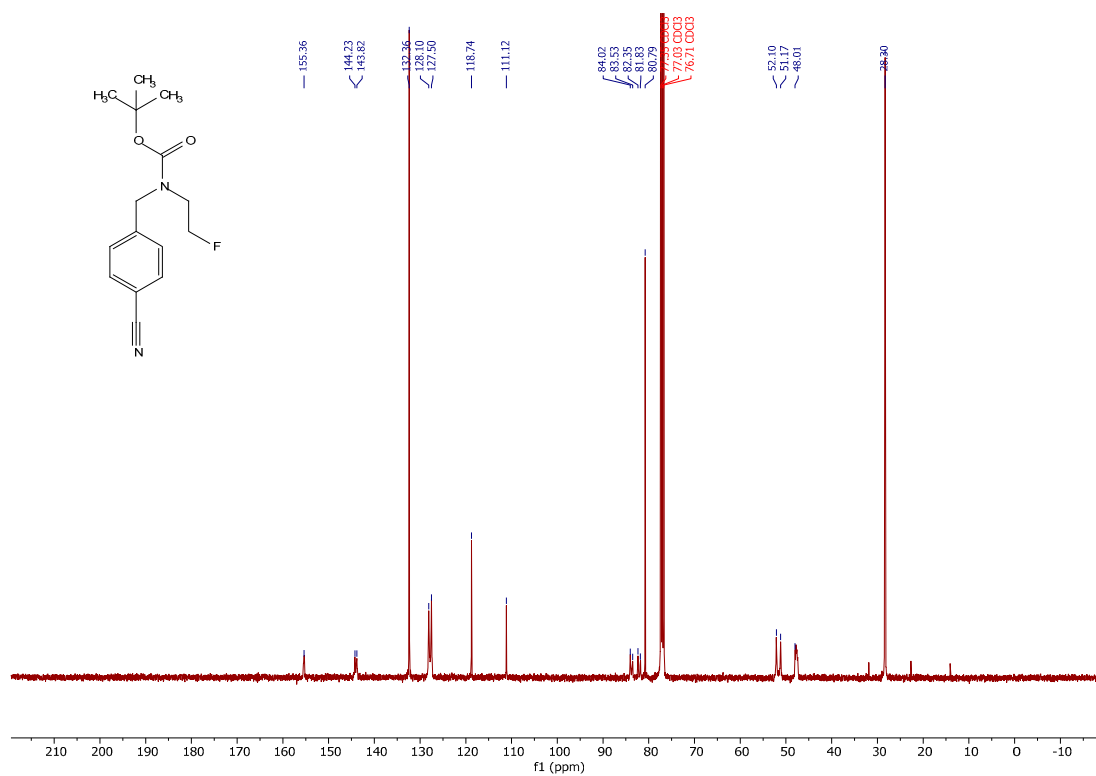

*Tert-butyl (4-cyanobenzyl)(2-hydroxyethyl)carbamate* (26)

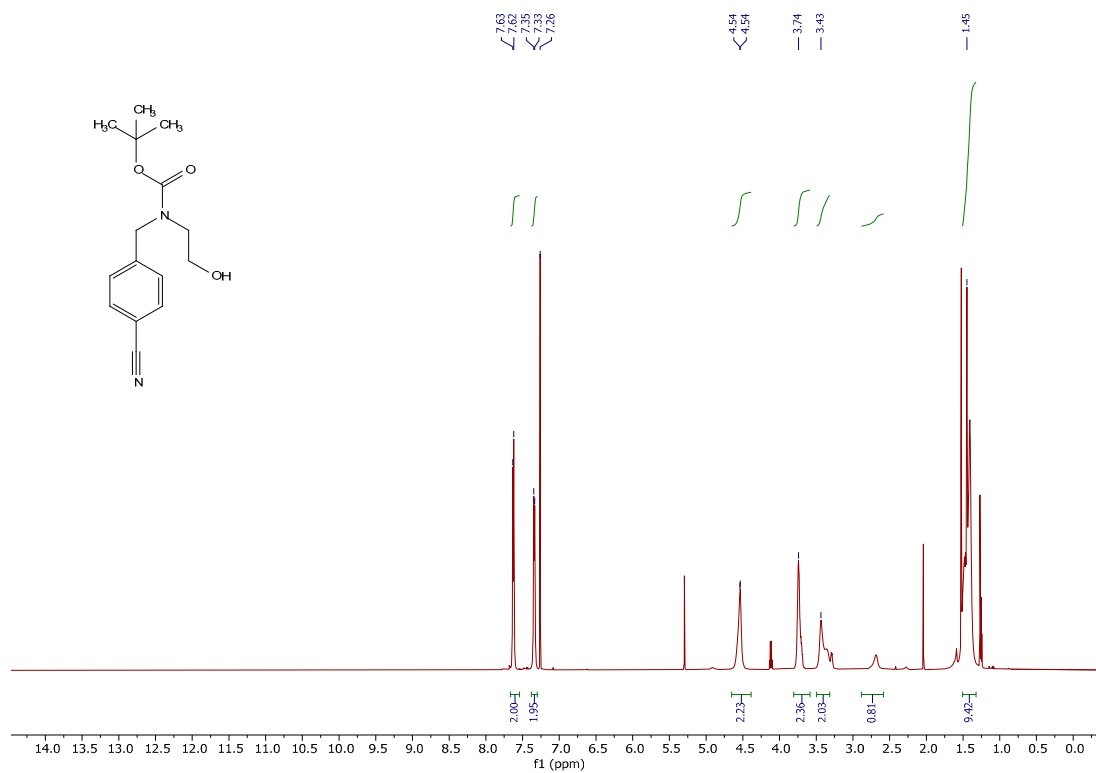

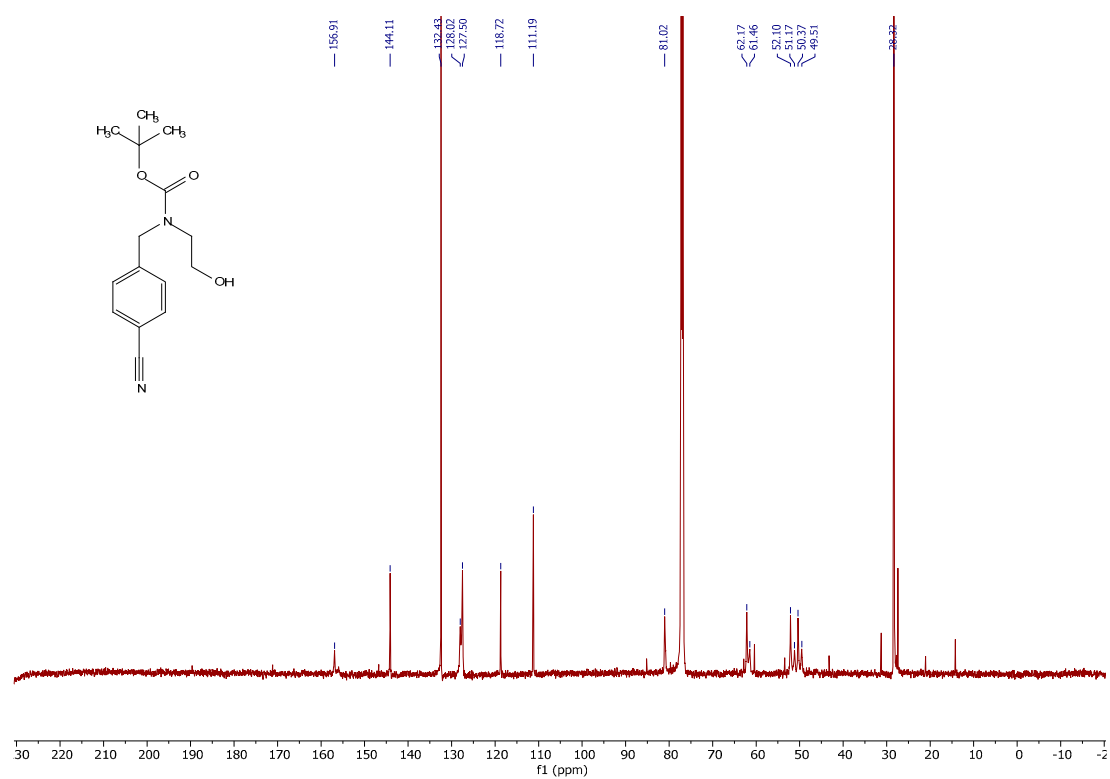

*Tert-butyl 4-(1,2,4,5-tetrazin-3-yl)benzyl(2-fluoroethyl)carbamate (27)*

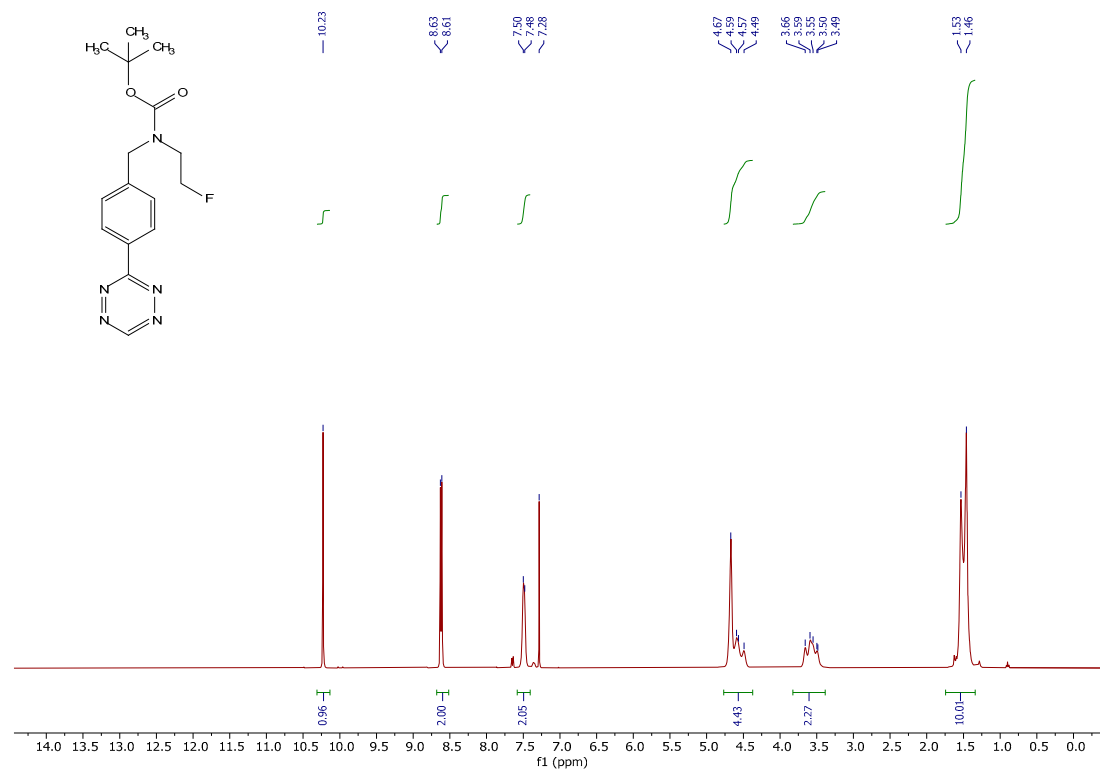

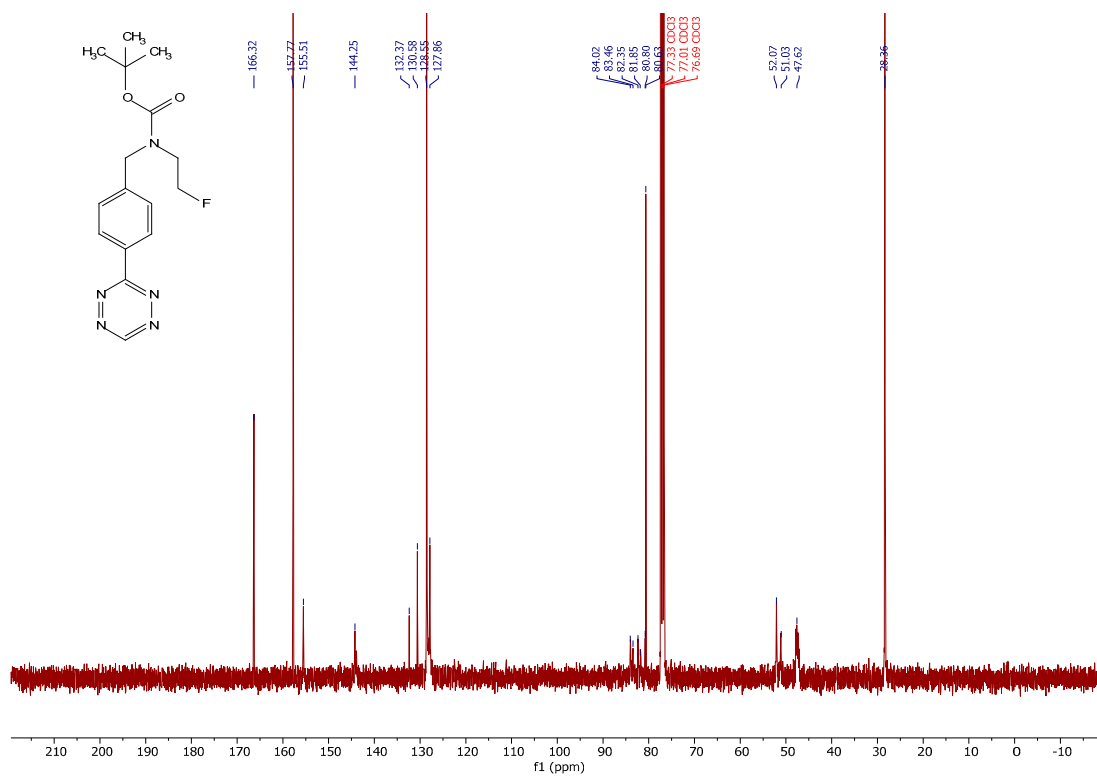

*Tert-butyl (4-(1,2,4,5-tetrazin-3-yl)benzyl)(2-hydroxyethyl)carbamate (28)*

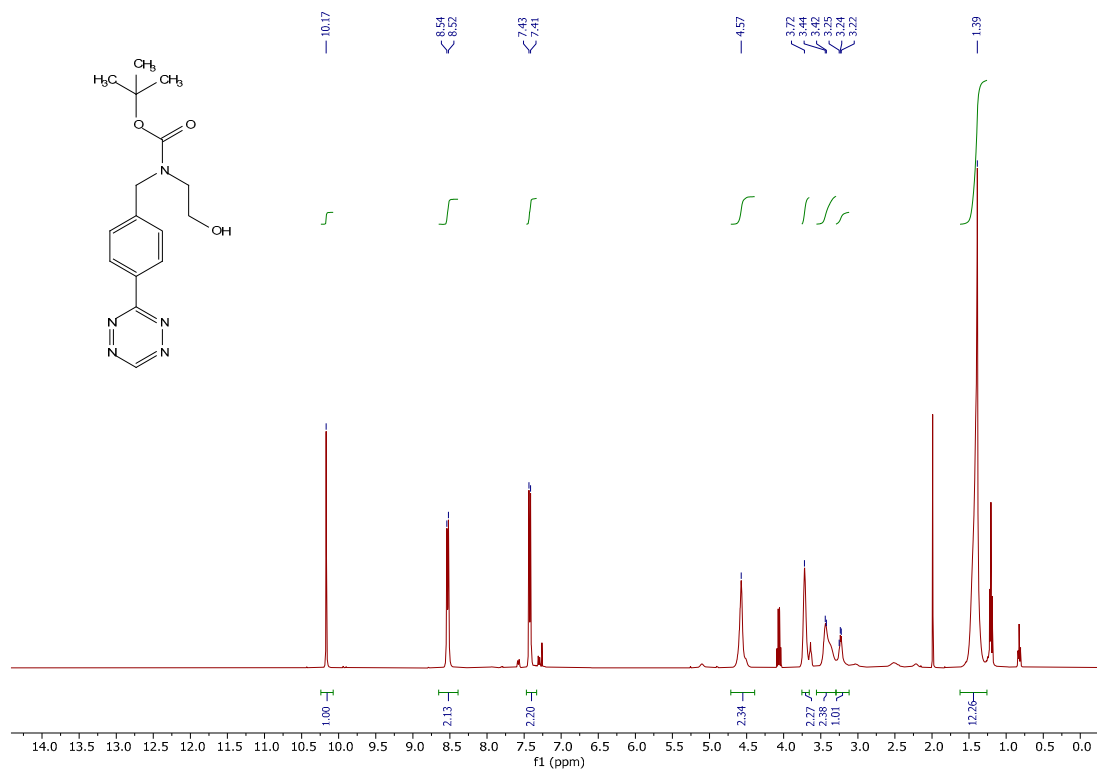



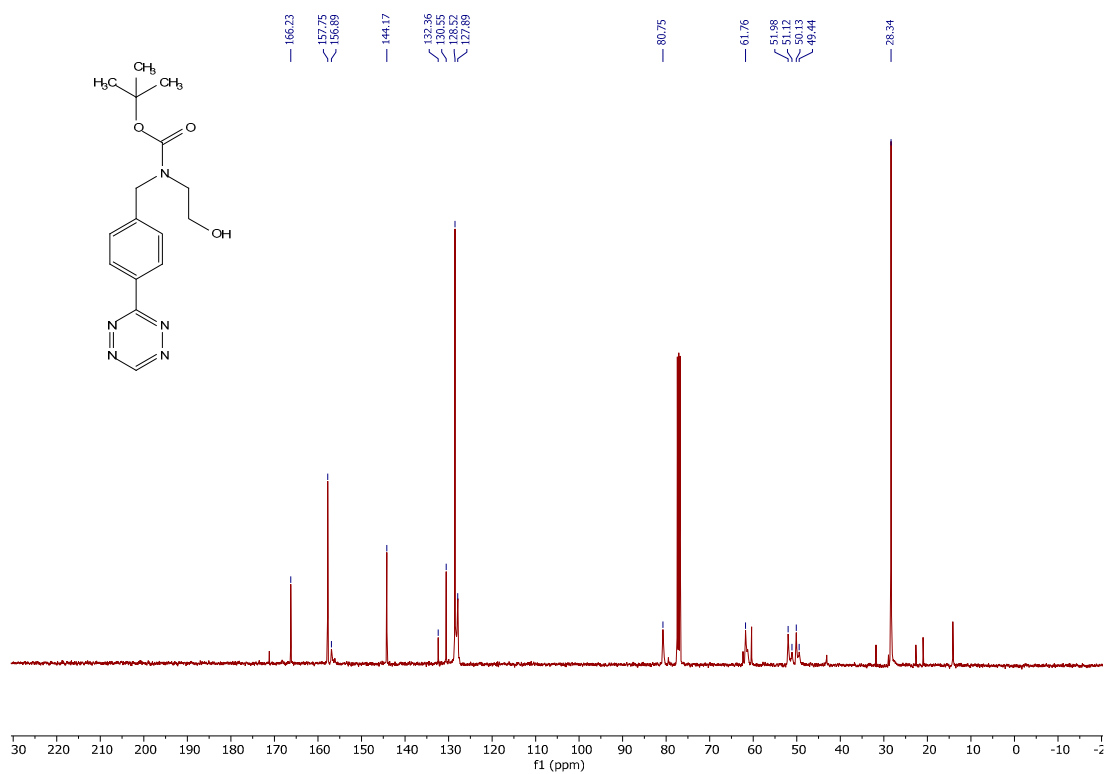

### 3-(4-(1,2,4,5-Tetrazin-3-yl)benzyl)oxazolidin-2-one

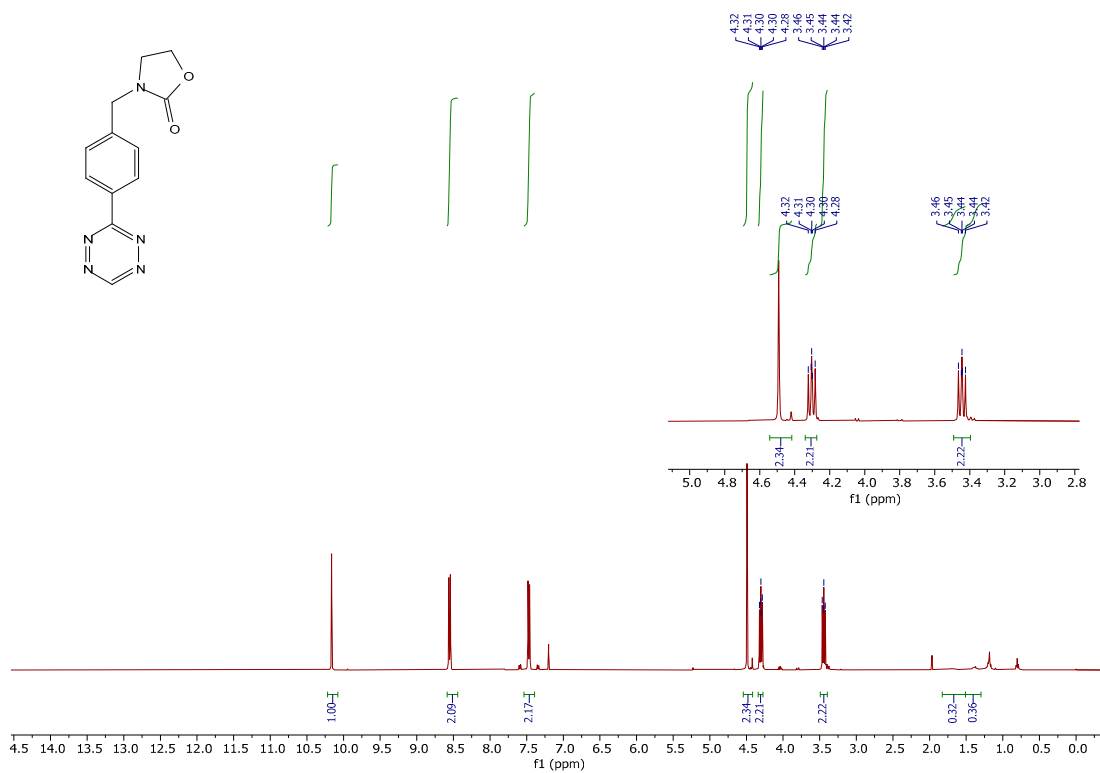

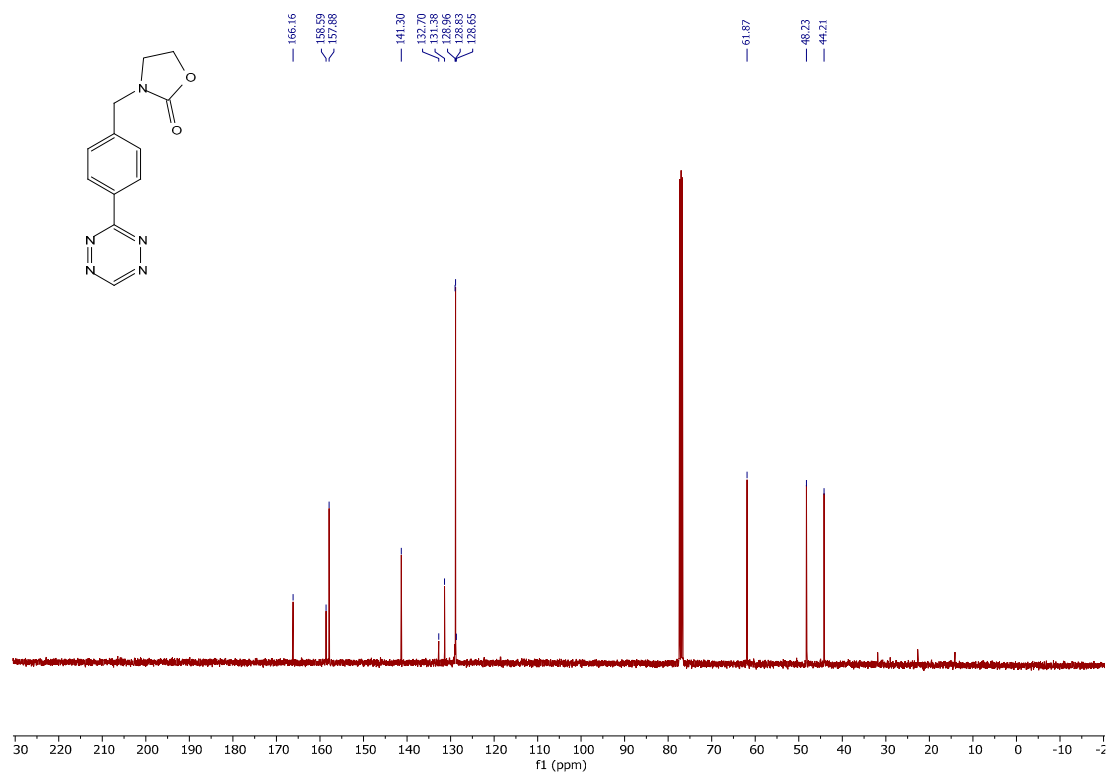

2-((4-(1,2,4,5-Tetrazin-3-yl)benzyl)amino)ethan-1-ol (29)

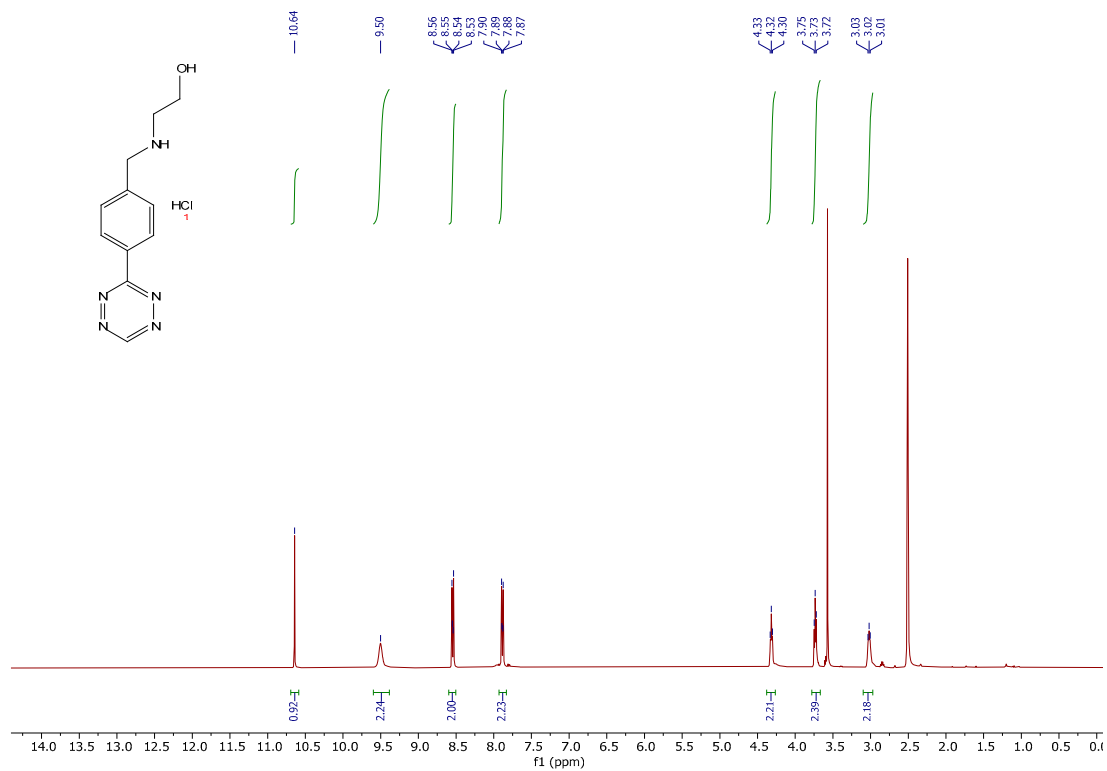

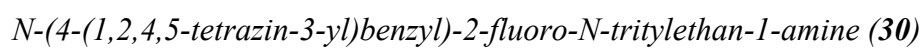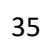

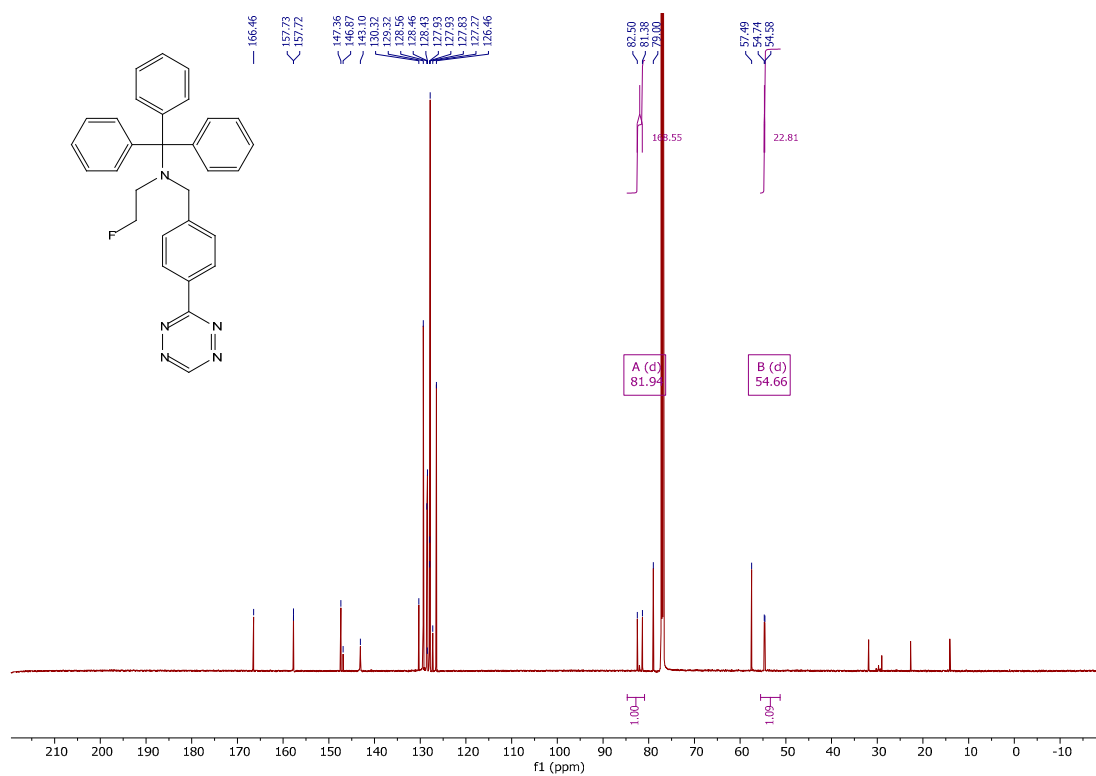

2-((4-(1,2,4,5-Tetrazin-3-yl)benzyl)(trityl)amino)ethan-1-ol (31)

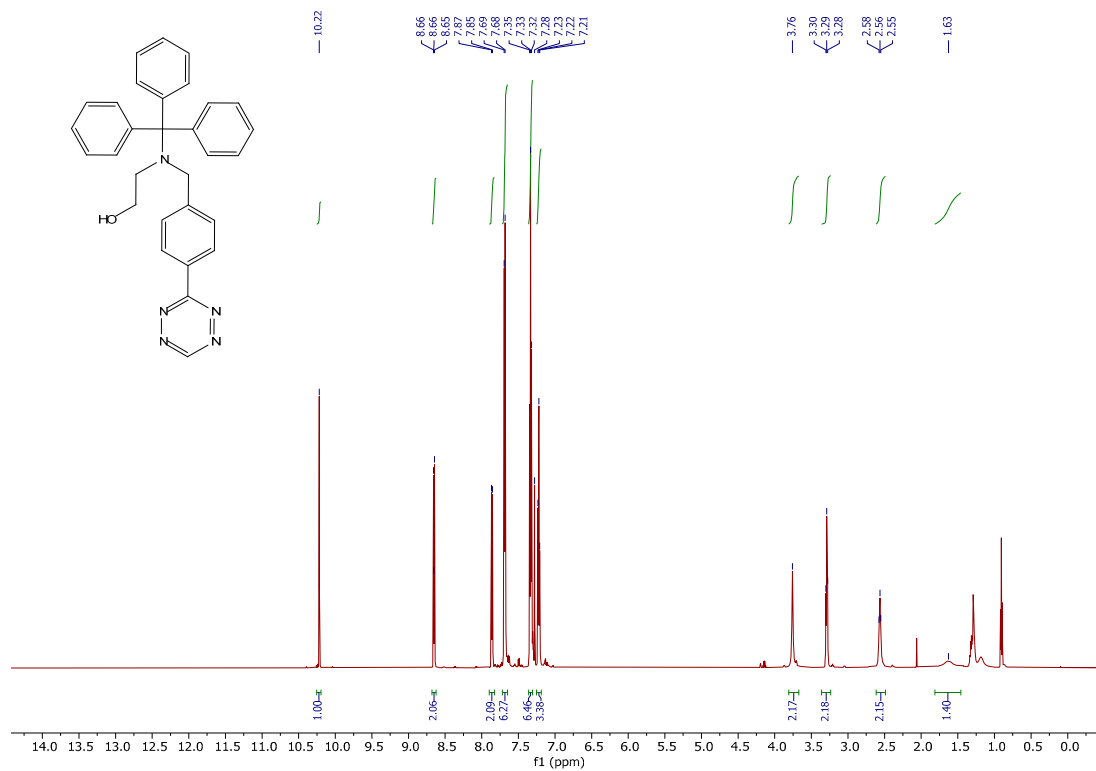

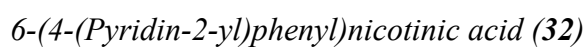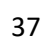

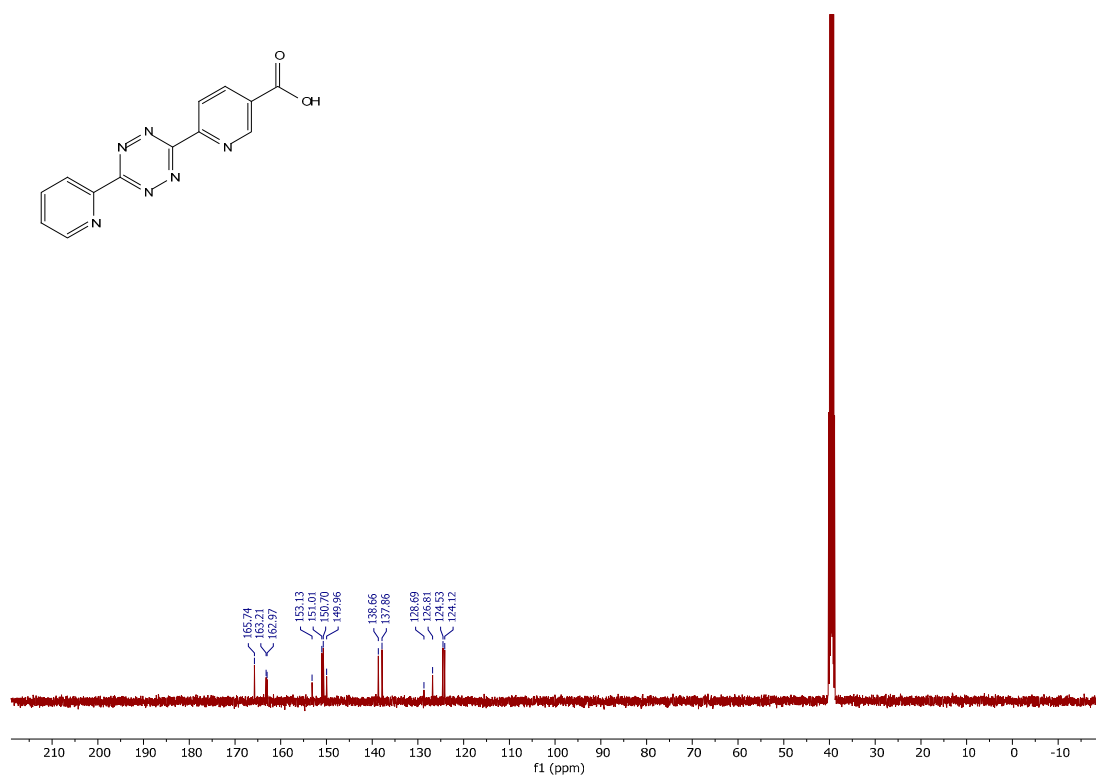

2-Fluoroethyl 6-(6-(pyridin-2-yl)-1,2,4,5-tetrazin-3-yl)nicotinate (**33**)

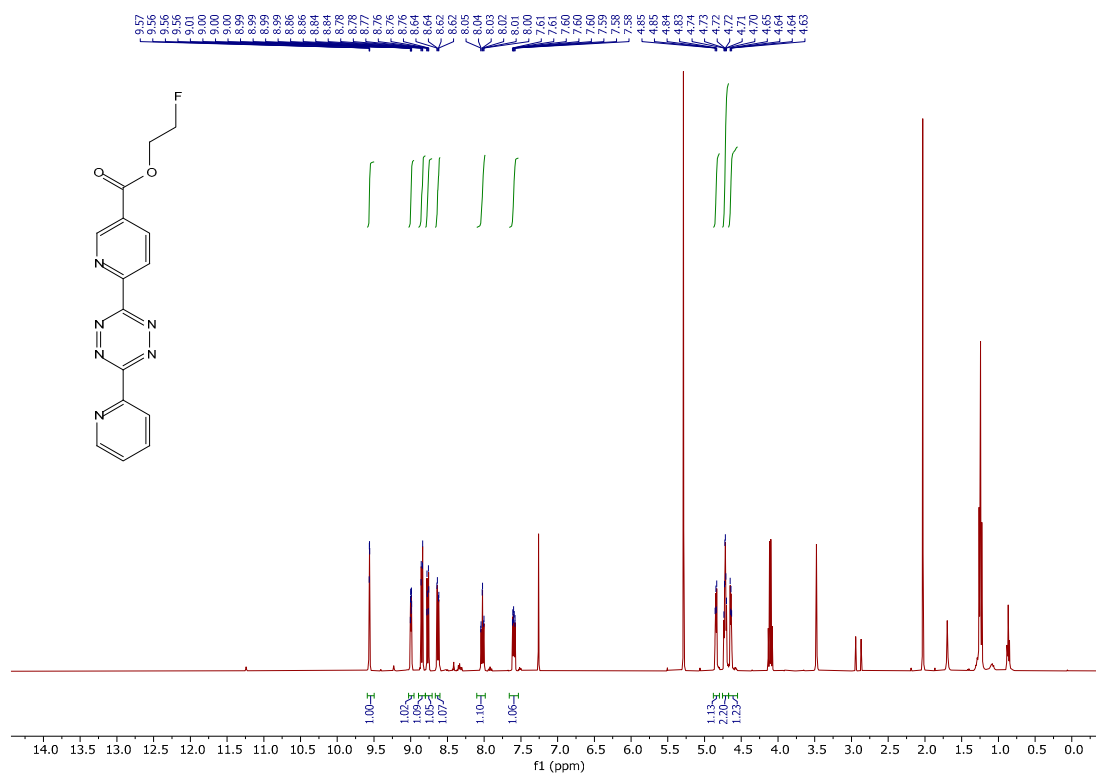

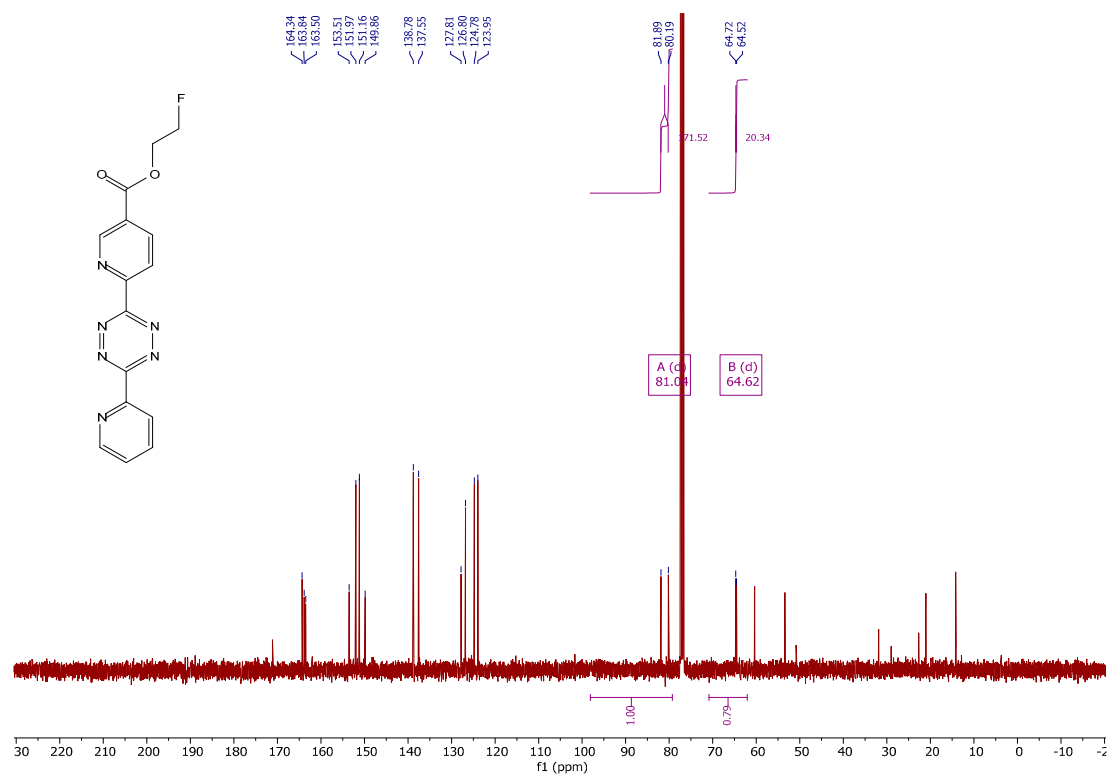

2-(((4-Nitrophenyl)sulfonyl)oxy)ethyl 6-(6-(pyridin-2-yl)-1,2,4,5-tetrazin-3-yl)nicotinate (33a)

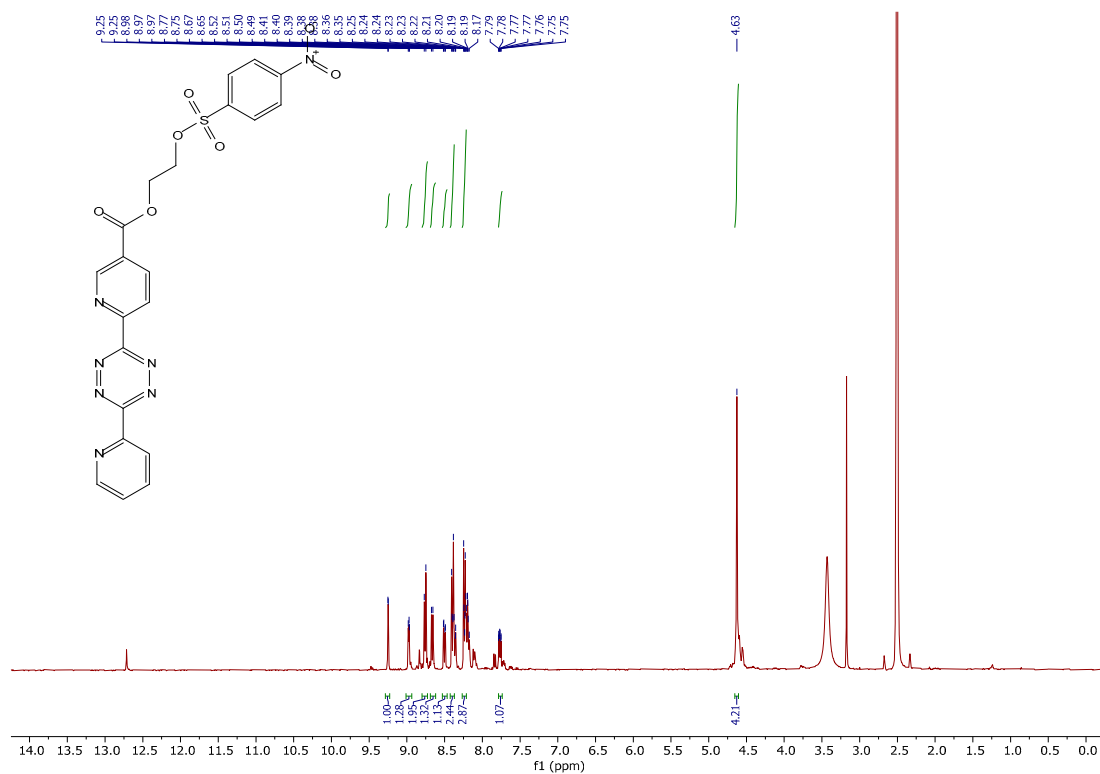

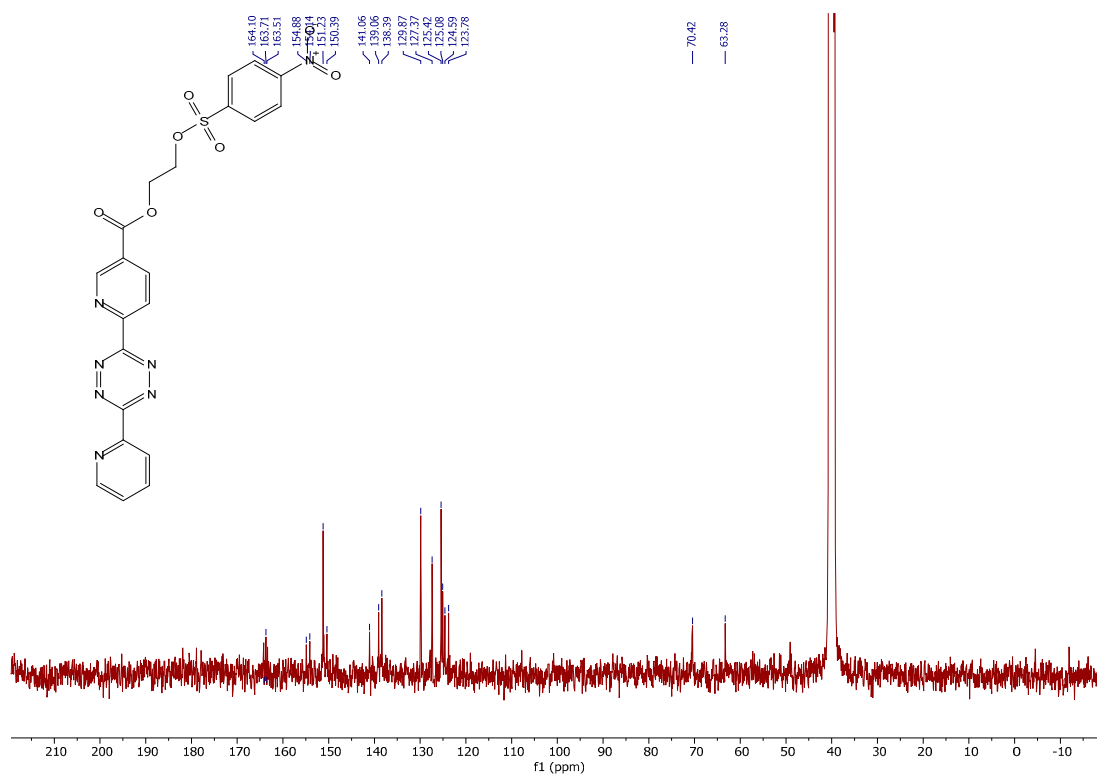

### 5-(Bromomethyl)picolinonitrile (35)

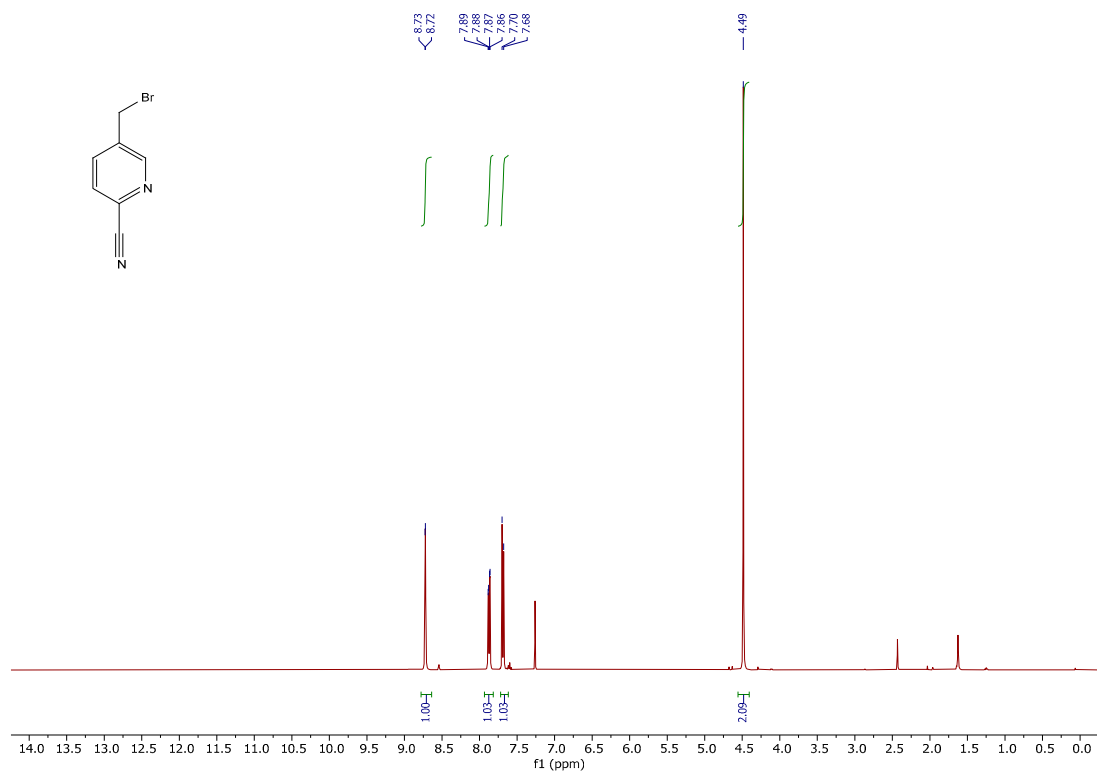



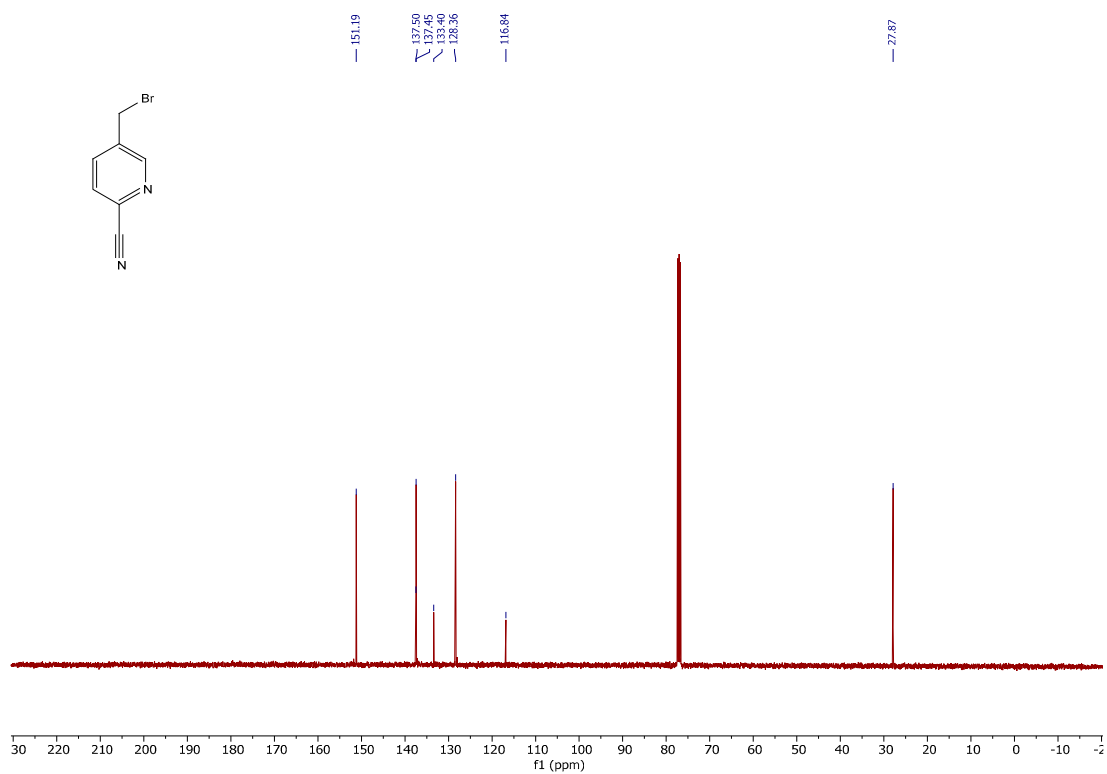

5-((2-Hydroxyethoxy)methyl)picolinonitrile (**36**)

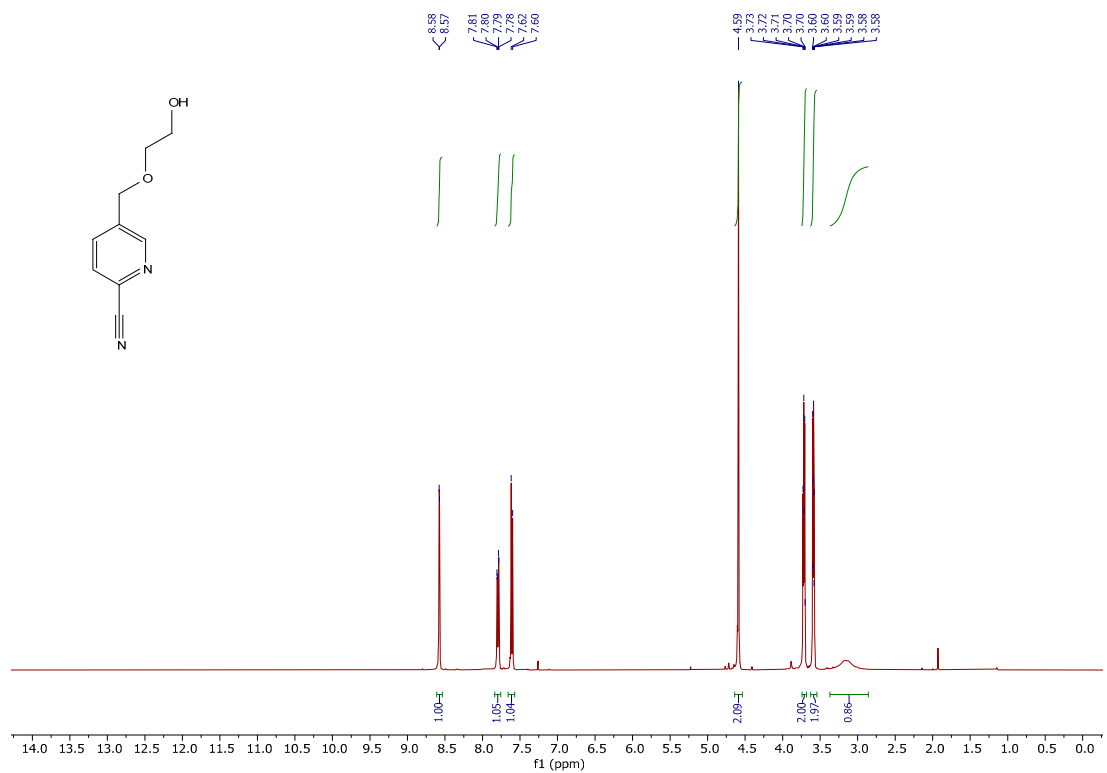

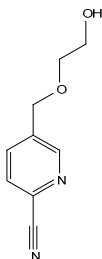[illegible]

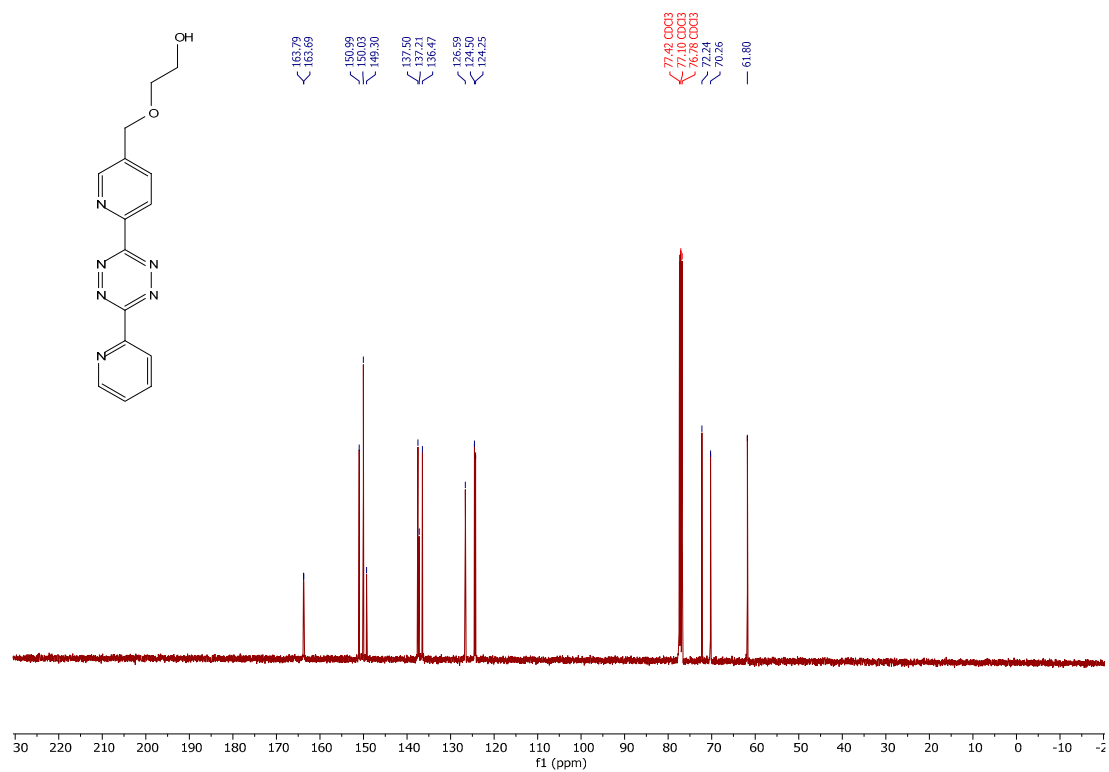

3-(5-((2-fluoroethoxy)methyl)pyridin-2-yl)-6-(pyridin-2-yl)-1,2,4,5-tetrazine (38)

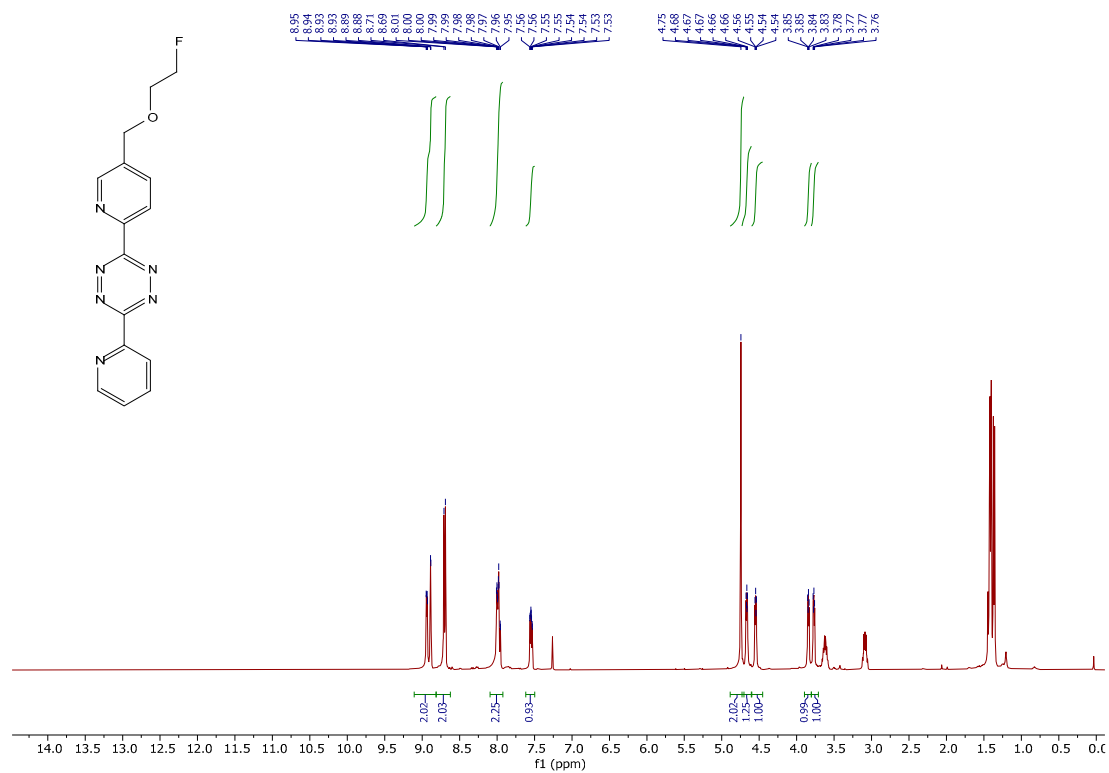

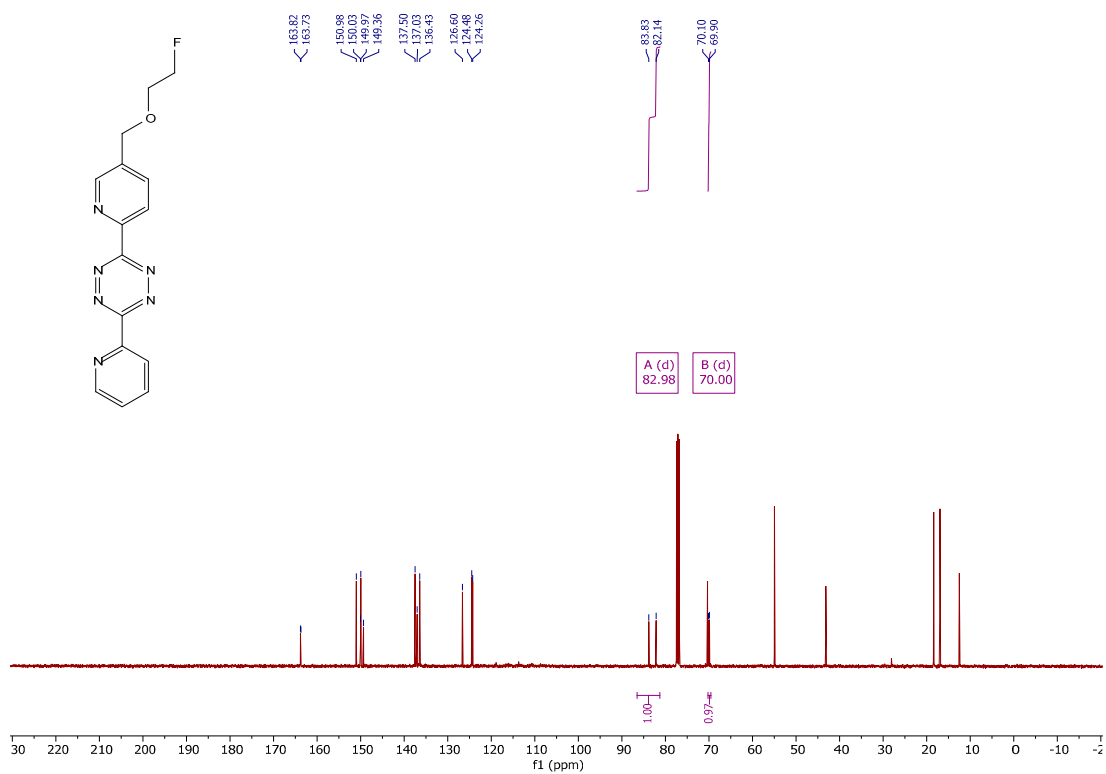

2-((6-(4-(pyridin-2-yl)phenyl)pyridin-3-yl)methoxy)ethyl 4-methylbenzene sulfonate (**38a**)

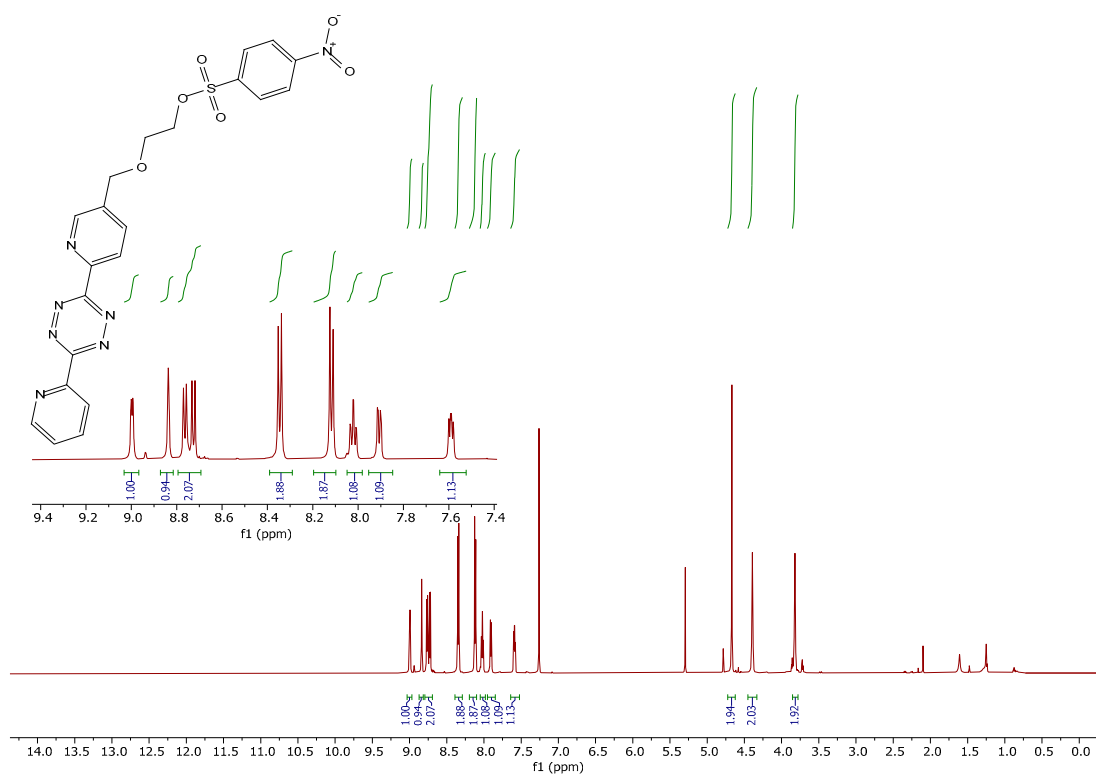

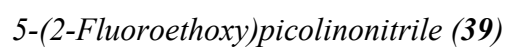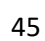

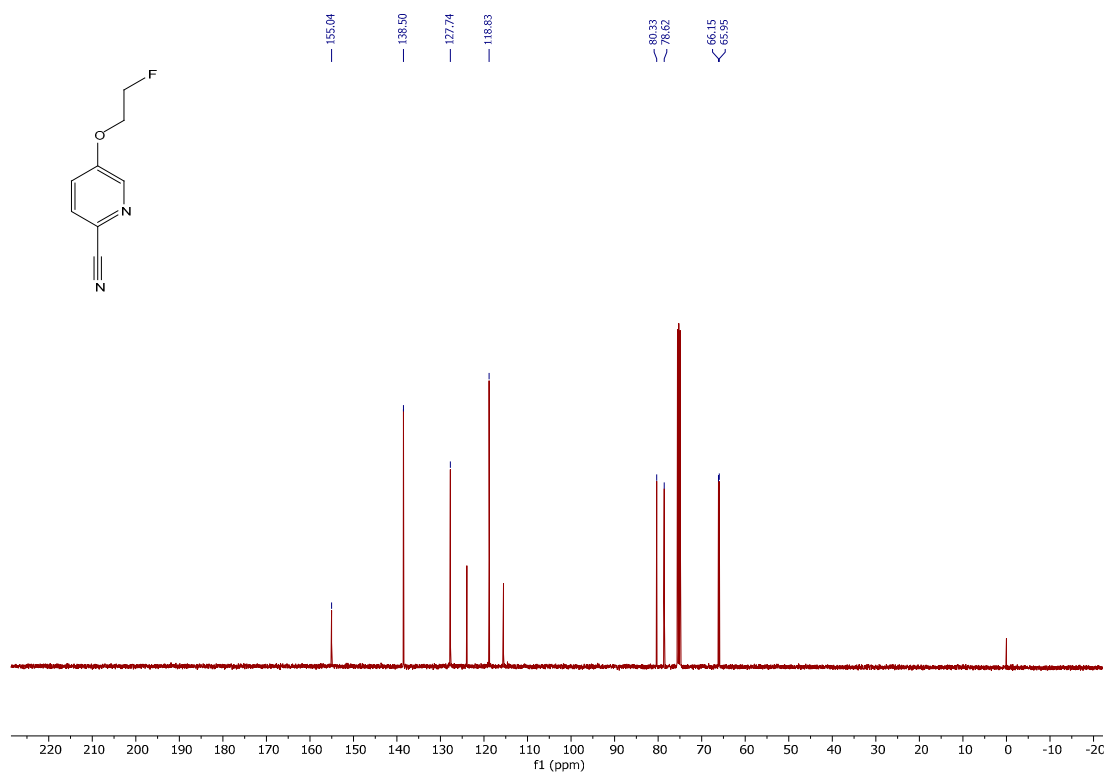

*5-(2-Hydroxyethoxy)picolinonitrile (40)*

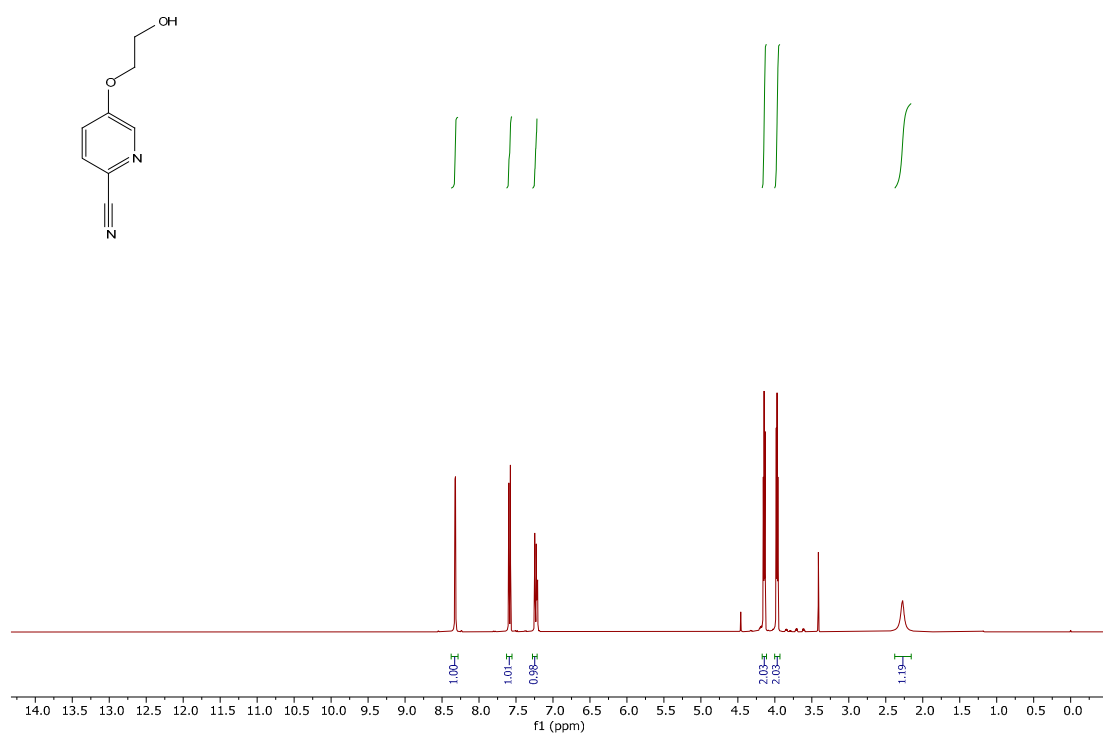

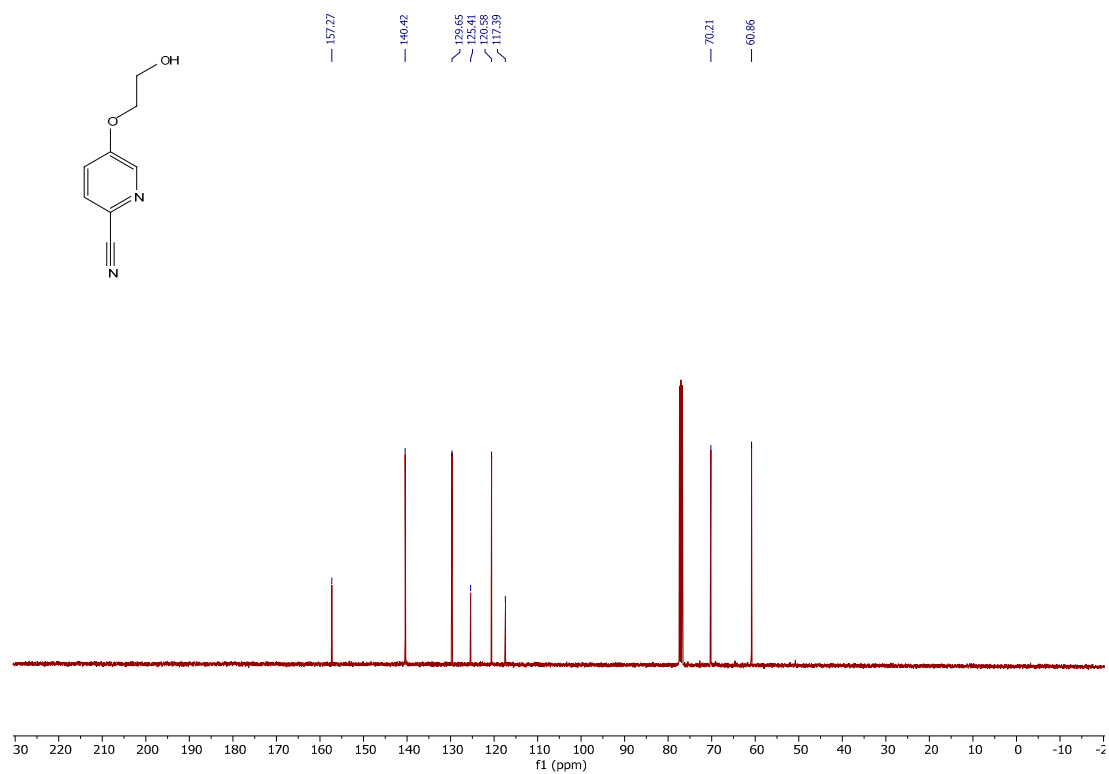

3-(5-(2-Fluoroethoxy)pyridin-2-yl)-6-(pyridin-2-yl)-1,2,4,5-tetrazine (**41**)

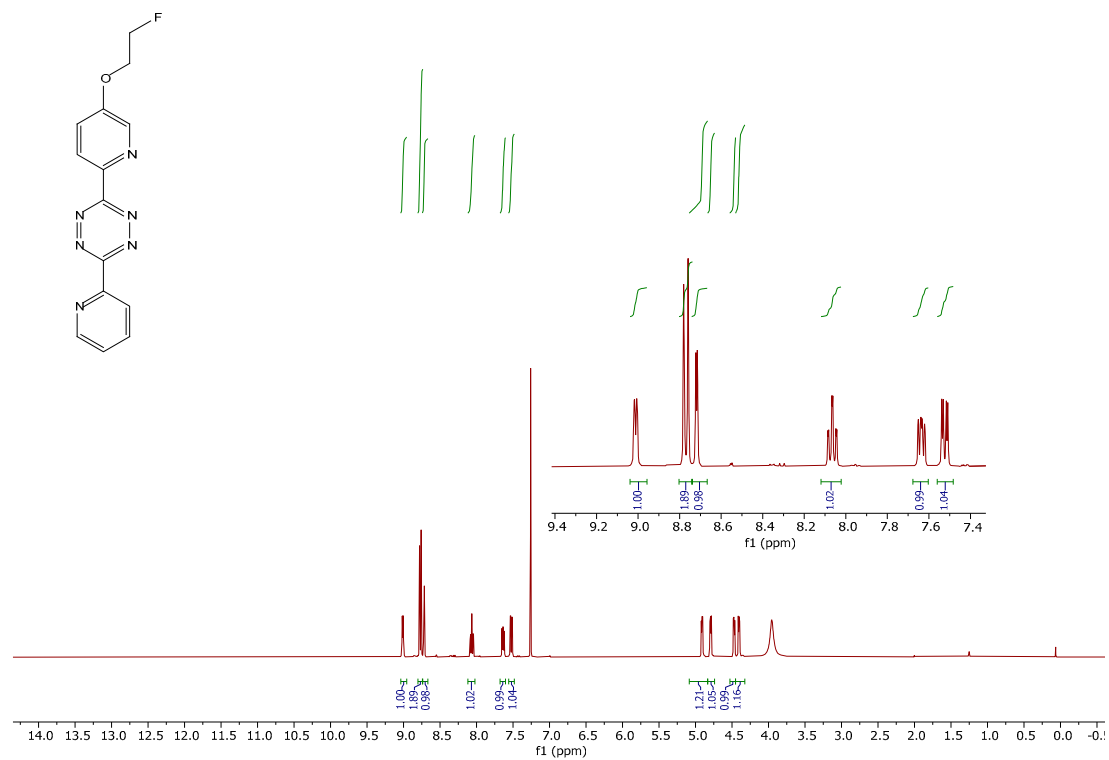

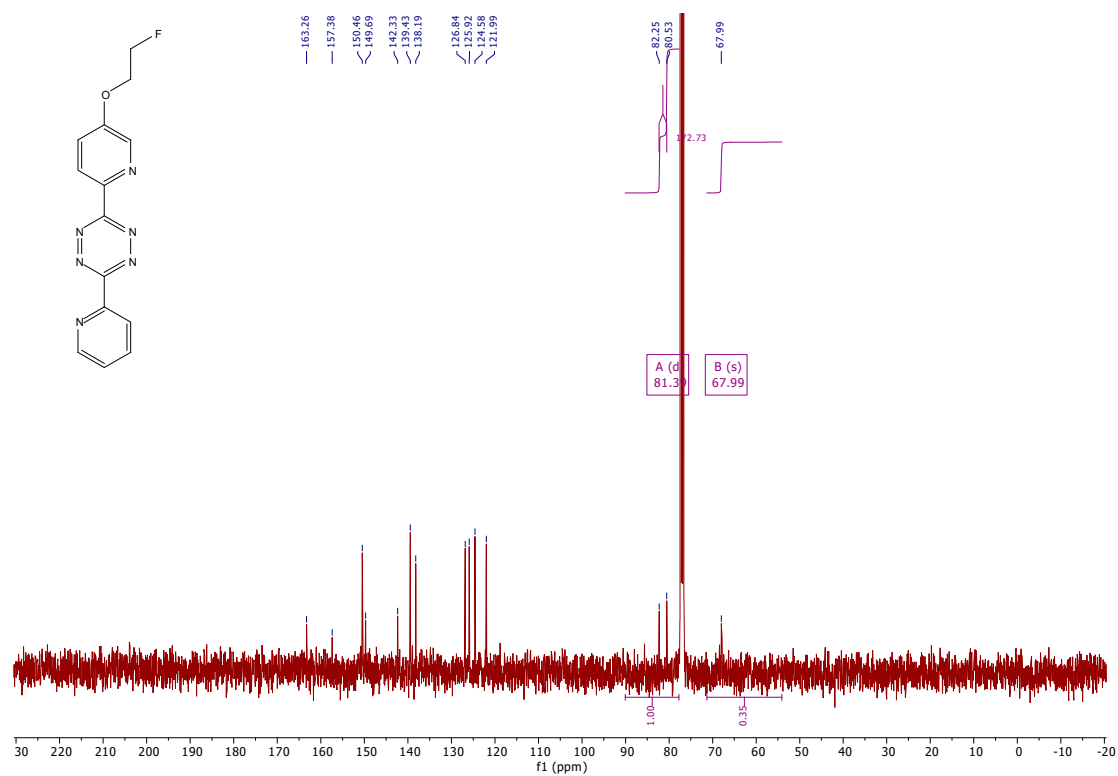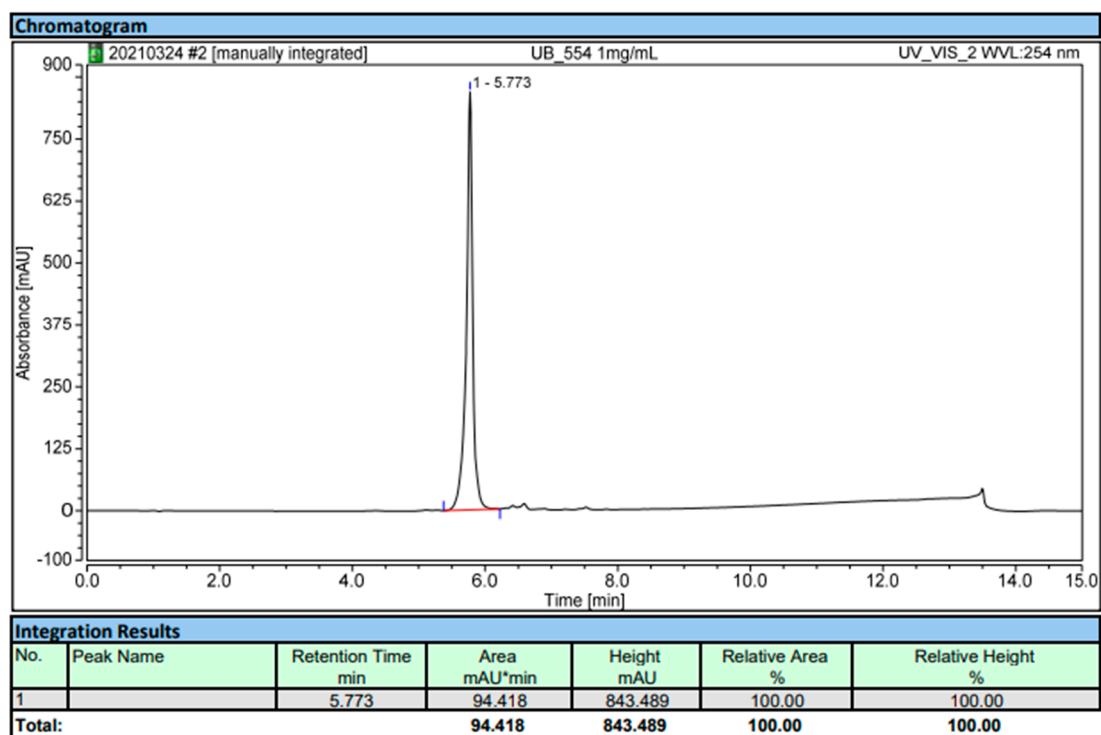

2-((6-(6-(Pyridin-2-yl)-1,2,4,5-tetrazin-3-yl)pyridin-3-yl)oxy)ethan-1-ol (42)



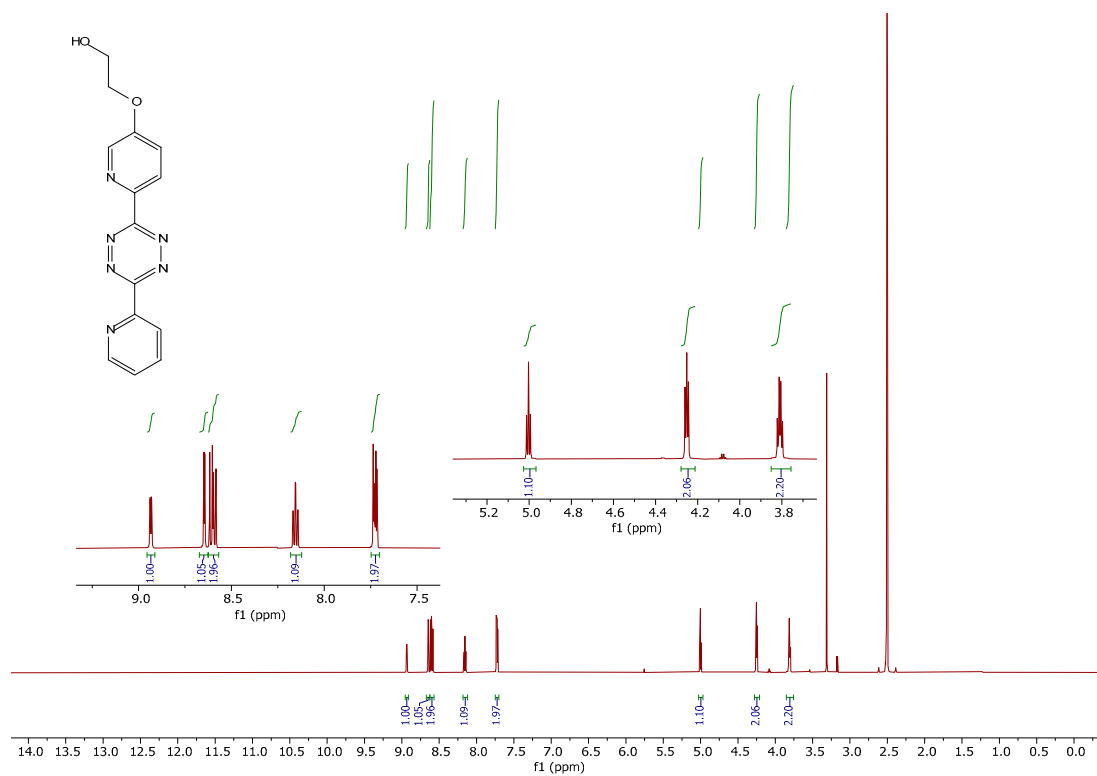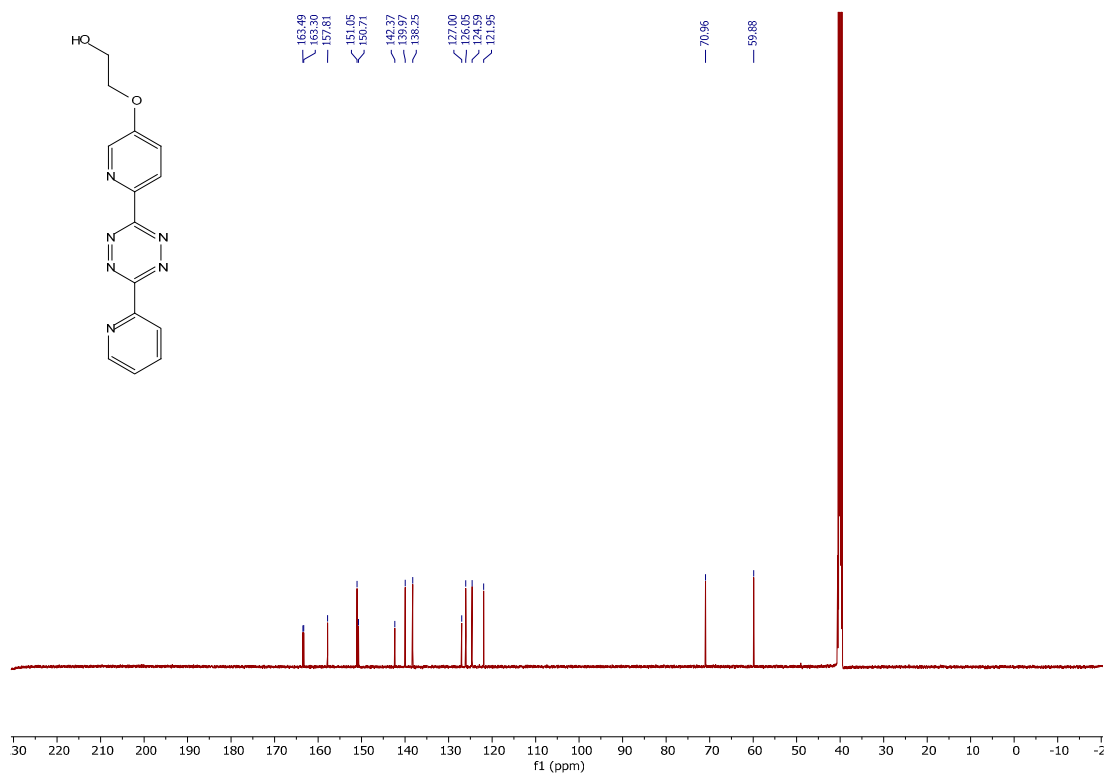

*Di-tert-butyl 2,2'-(((6-cyanopyridin-3-yl)methyl)azanediyl)diacetate (43)*

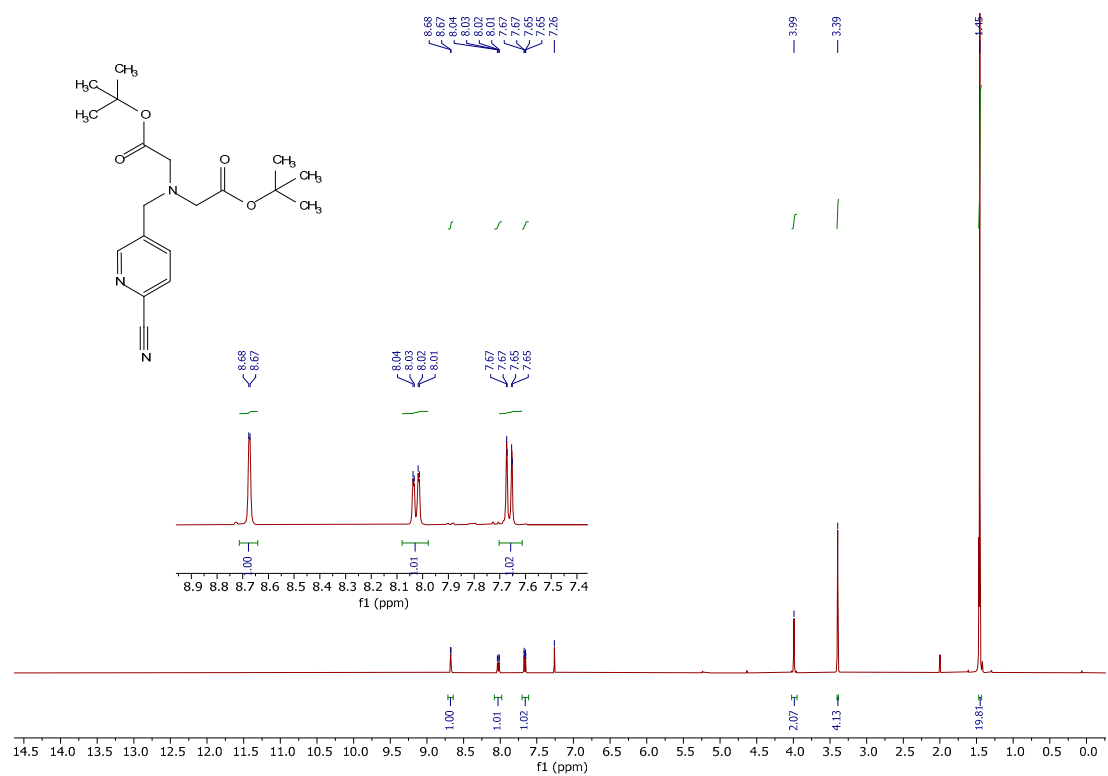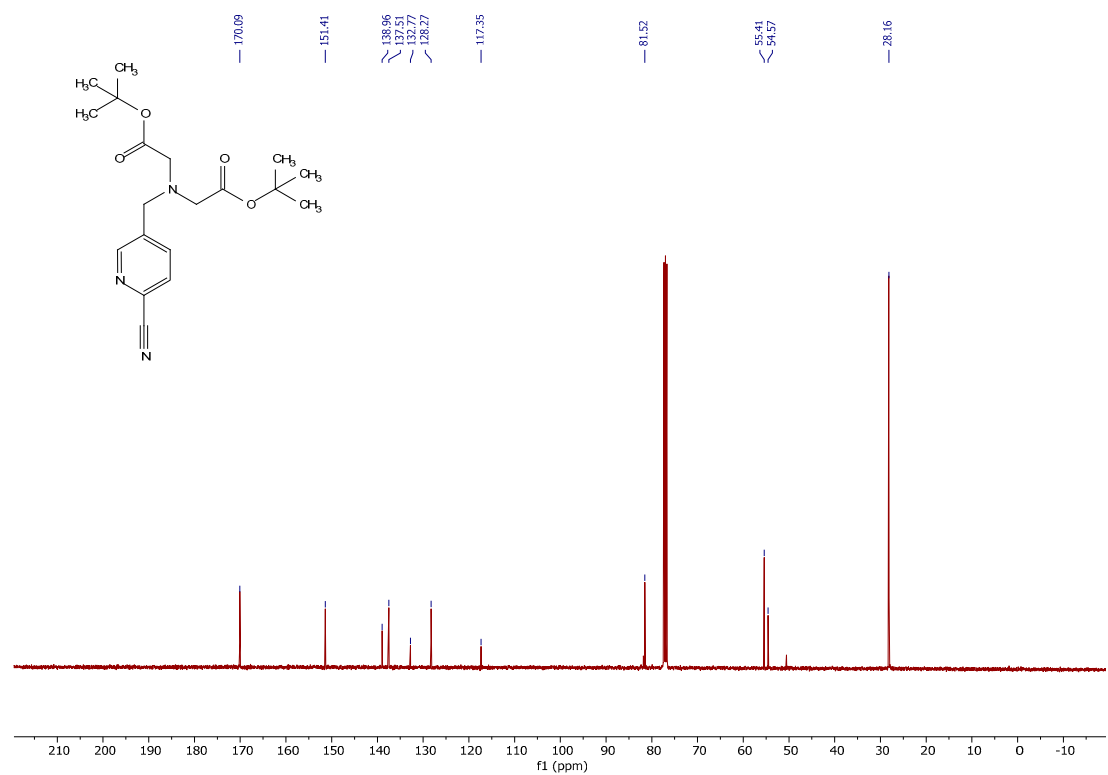

*Di-tert-butyl 2,2'-(((6-(6-(5-(2-fluoroethoxy)pyridin-2-yl)-1,2,4,5-tetrazin-3-yl)pyridin-3-yl)methyl)-azanediyl)diacetate (44)*

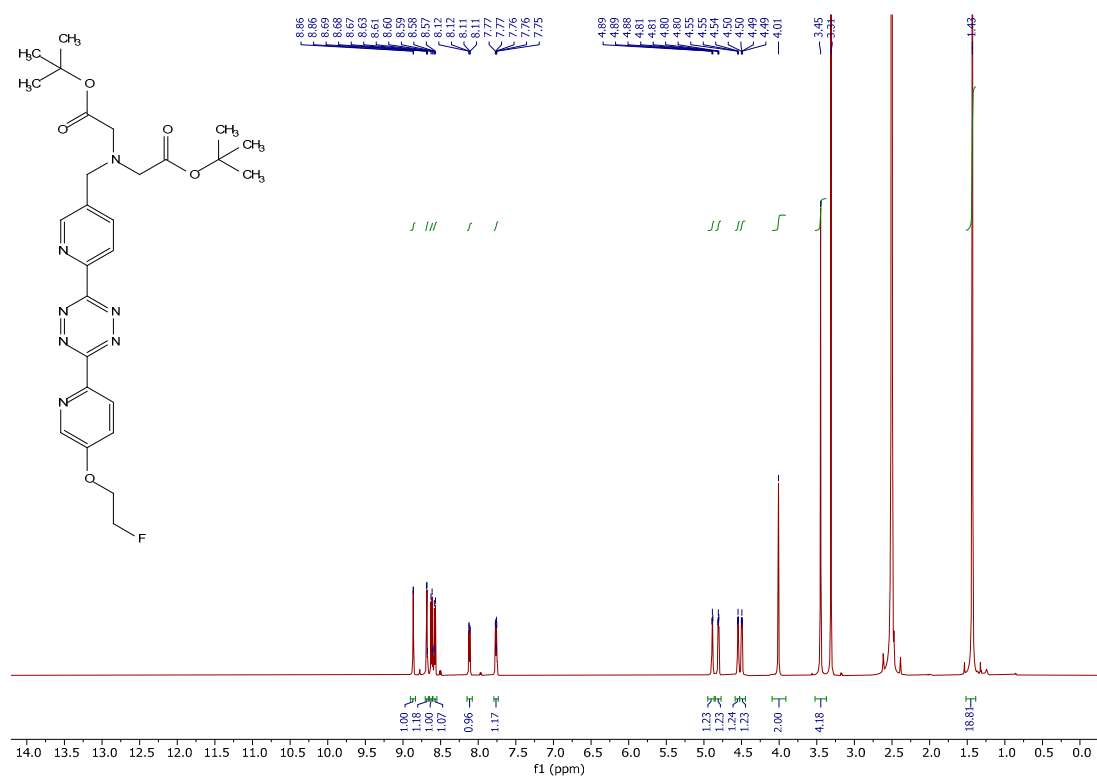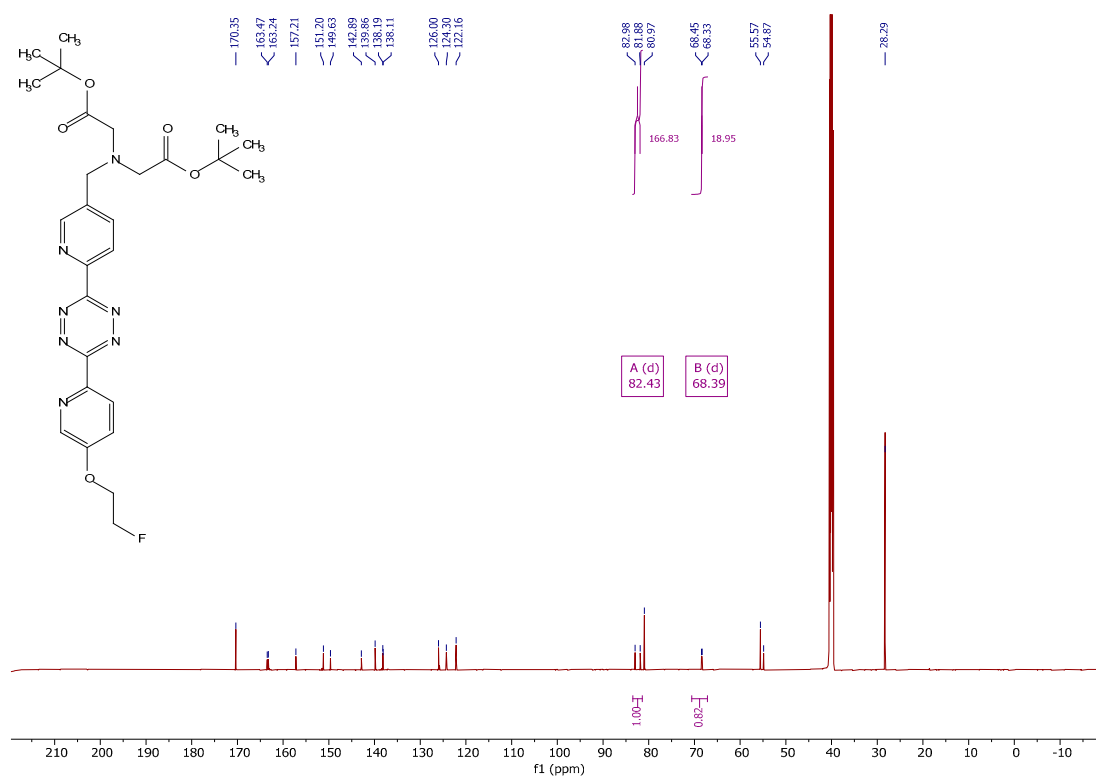



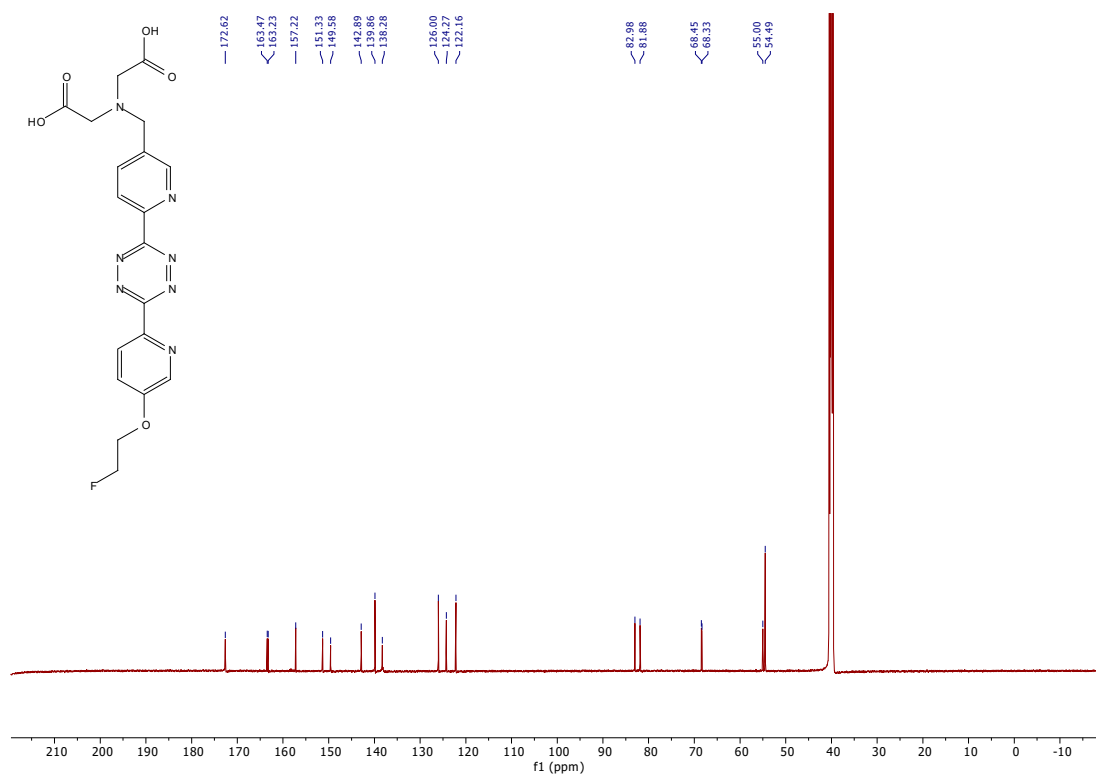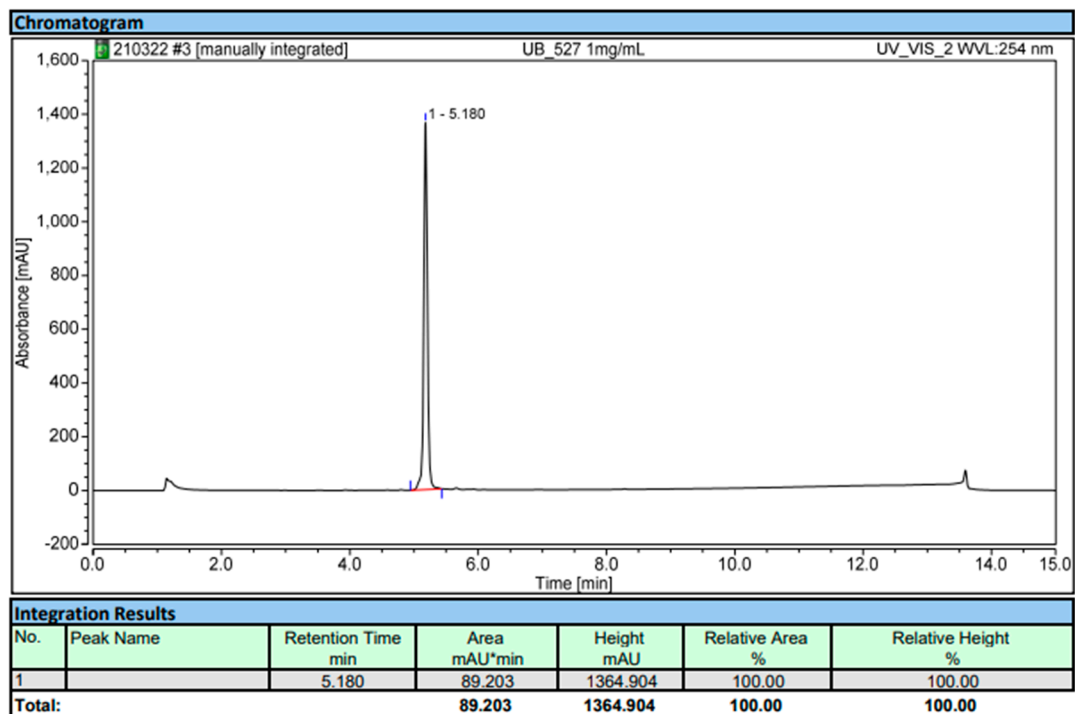

*Di-tert-butyl 2,2'-(((6-(6-(5-(2-(((4-nitrophenyl)sulfonyl)ethoxy)pyridin-2-yl)-1,2,4,5-tetrazin-3-yl)pyridin-3-yl)methyl)azanediyl)diacetate (45a)*

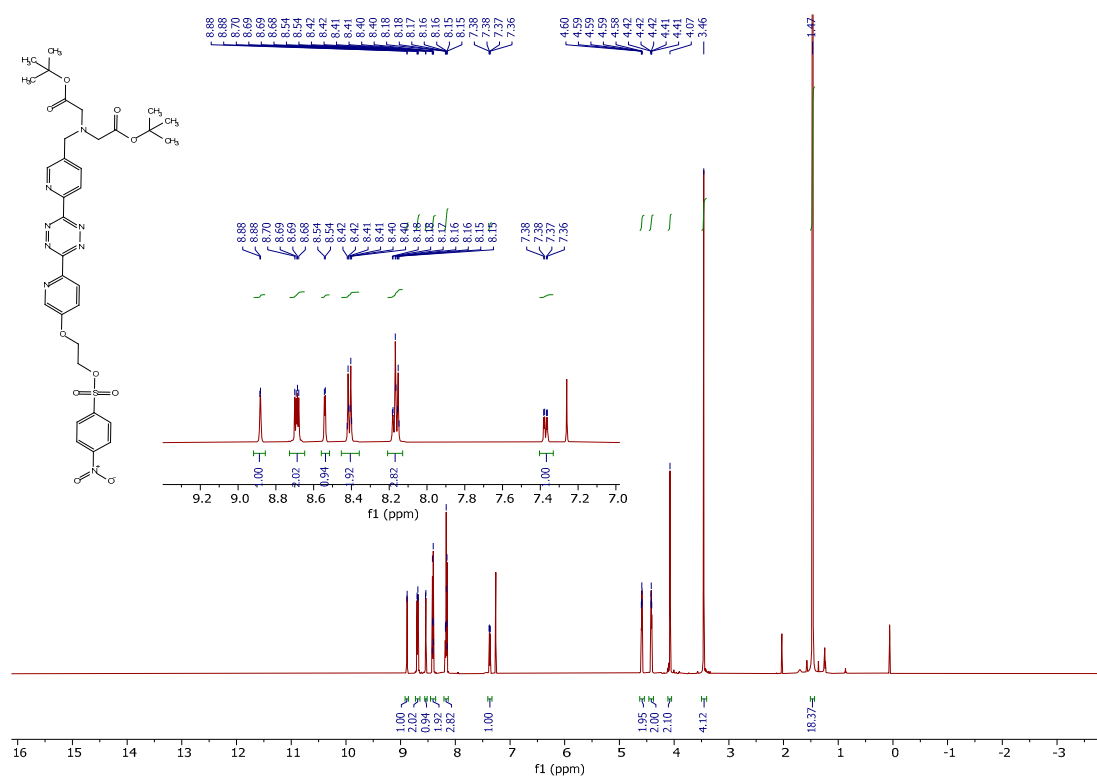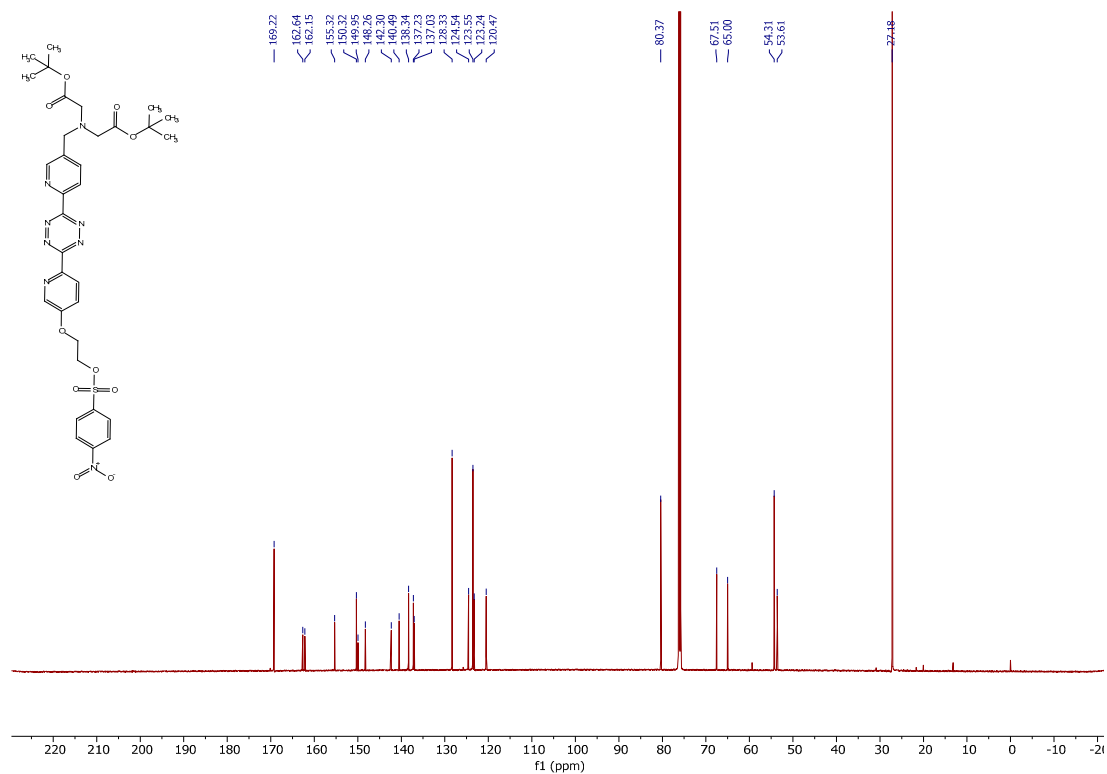

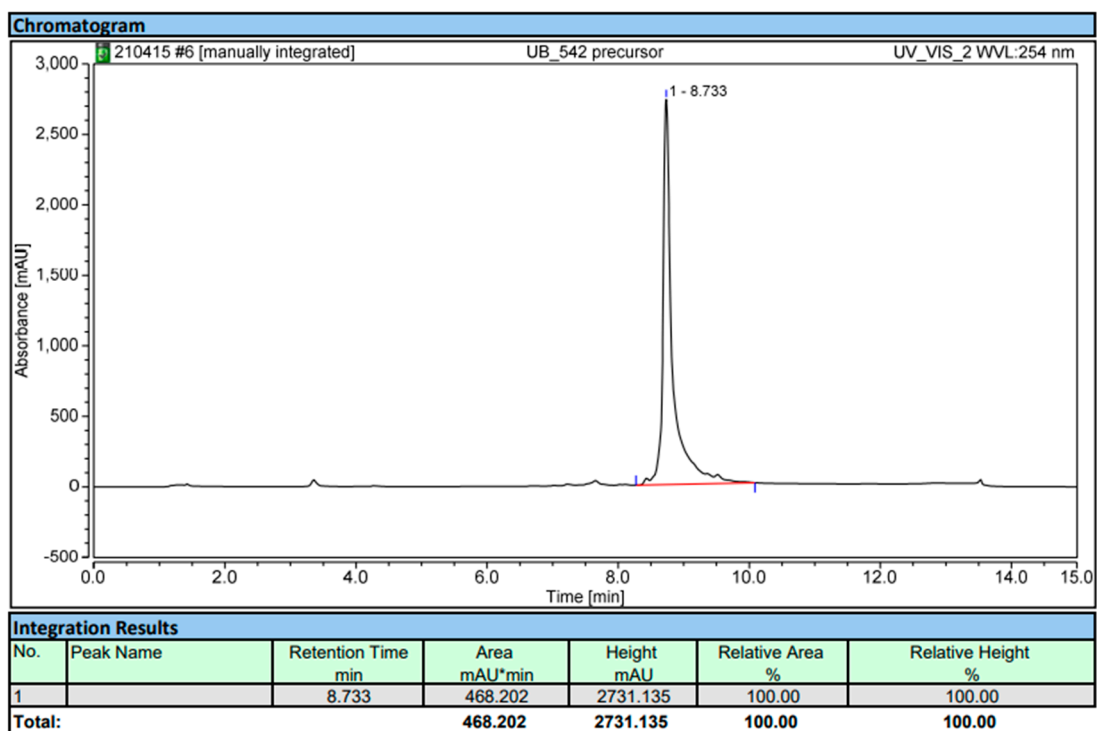

*Di-tert-butyl 2,2'-(((6-(6-(5-(2-hydroxyethoxy)pyridin-2-yl)-1,2,4,5-tetrazin-3-yl)pyridin-3-yl)methyl)azanediyl)diacetate (46)*

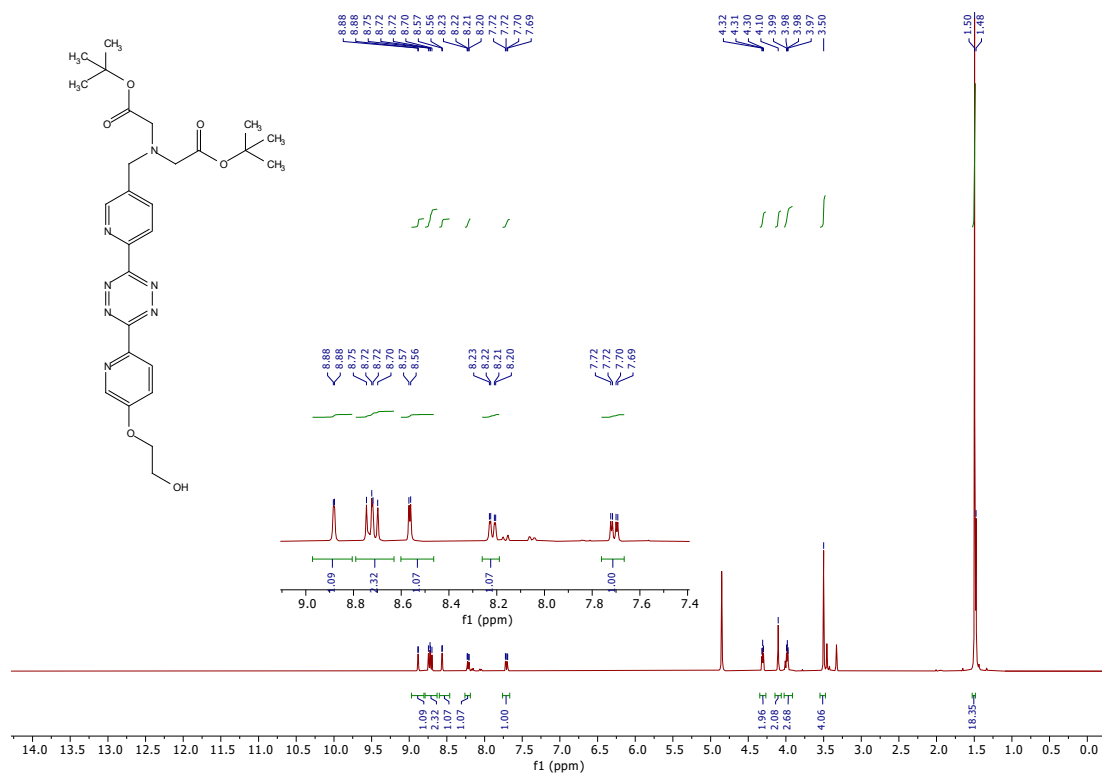





## Labeling of compound [ $^{18}\text{F}$ ]8

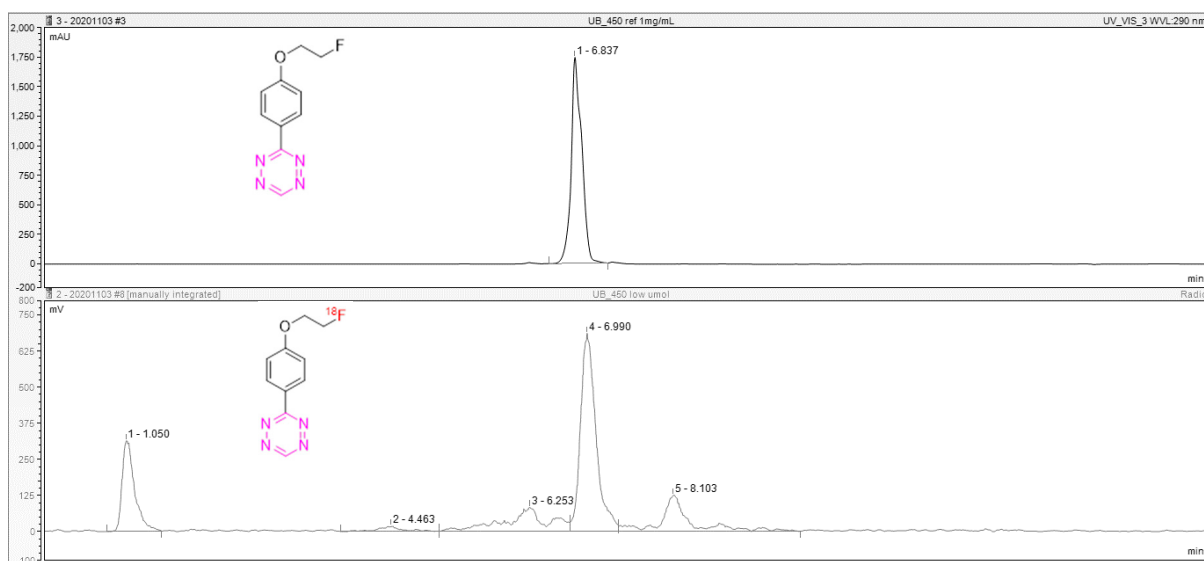

## Labeling of compound [ $^{18}\text{F}$ ]33

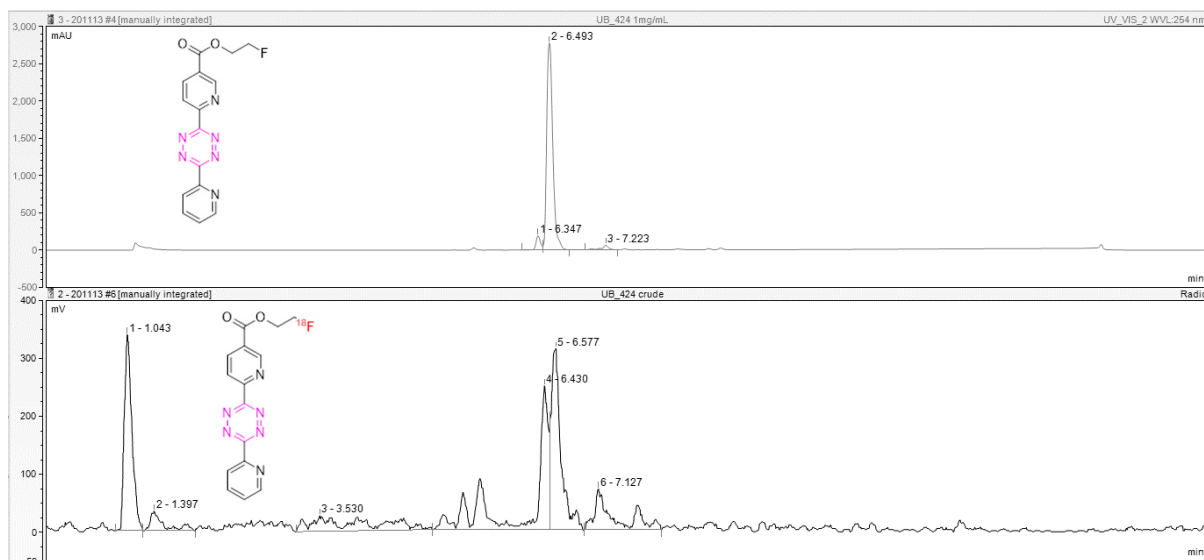

## Labeling of compound [ $^{18}\text{F}$ ]38

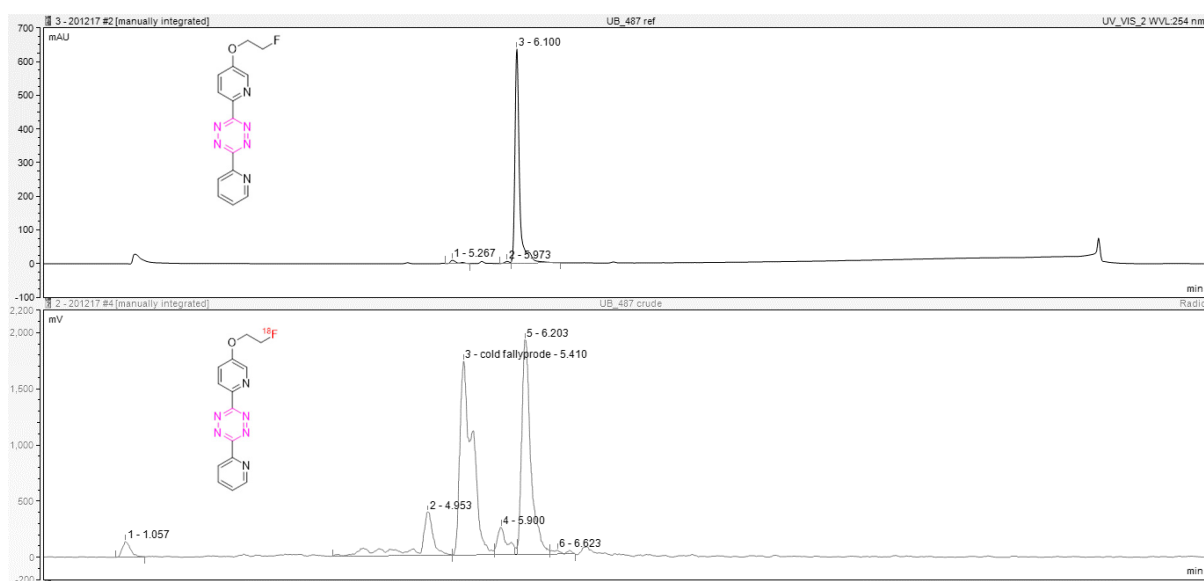

## Labeling of compound [ $^{18}\text{F}$ ]41

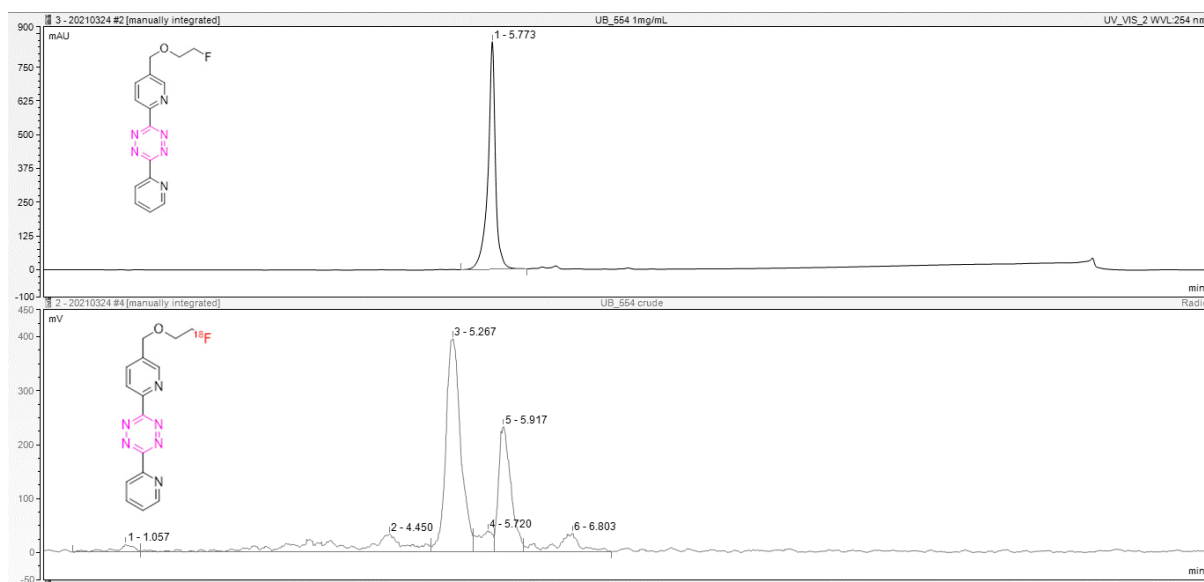

## Labeling of compound [ $^{18}\text{F}$ ]44

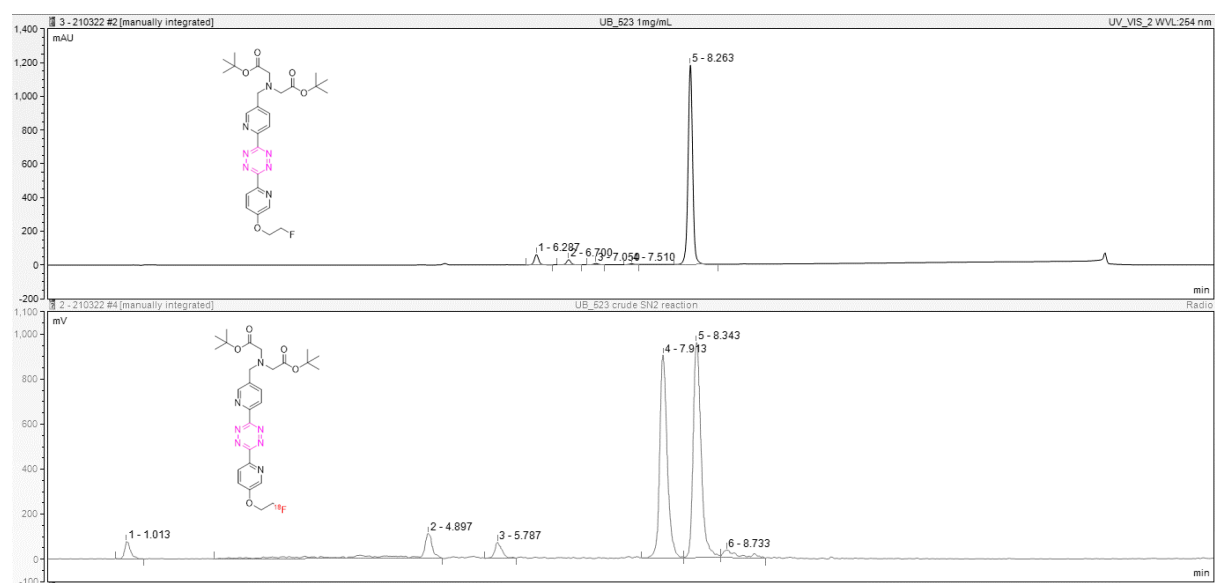

## Deprotection of compound [ $^{18}\text{F}$ ]44

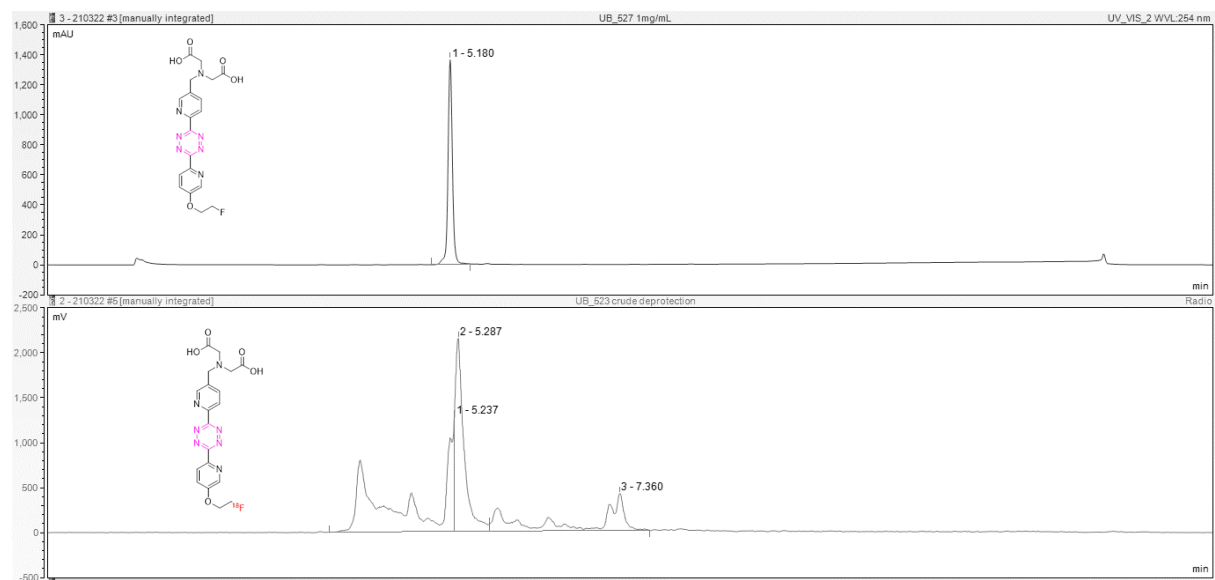

Supplement: s1 [file s1]
